# Supplementary material for: The TRIM-NHL protein NHL-2 is a co-factor in the nuclear and somatic RNAi pathways in C. elegans
Source: eLife. 2018 Dec 21;7:e35478. doi: 10.7554/eLife.35478 (PMC6351104; doi:10.7554/eLife.35478)
Supplement: Supplementary file 1. [file elife-35478-supp1.xlsx]

## Sheet: small RNA
Table S1	After excluding reads that mapped to known ncRNAs, e.g., rRNAs, tRNAs, and snoRNAs, 87% of the remaining reads mapped to the C. elegans genome.
	Small RNA sequencing statistics
Experiment	Total Reads	ncRNA reads (rRNAs,tRNAs,…)	Genome mapping	Exon-Exon Junction	21U-RNAs	Hairpins (sense)	Hairpins (antisense)	miRNAs (sense)	miRNAs (antisense)	mRNAs (sense)	mRNAs (antisense)	Pseudogene (sense)	Pseudogene (antisense)	RMSK (sense)	RMSK (antisense)
N2 20°C replicate 1	7500960	235803	6475034	241234	135613	938196	817.13	934385	849.56	107289	3.86591e+06	22125.7	302784	167728	203802
N2 20°C replicate 2	6011656	328571	5076605	180603	91422.2	795205	351.42	792710	382.21	69684.4	2.94785e+06	16630.6	220044	114210	131984
N2 20°C replicate 3	5306046	194965	4547005	163602	116458	710499	519.41	708641	540.5	66807.1	2.69967e+06	15264.9	205094	108493	126341
N2 25°C replicate 1	8935843	398584	7454356	286491	74401.1	1.22906e+06	660.71	1.22302e+06	679.9	121284	4.27533e+06	23914	409083	227419	245851
N2 25°C replicate 2	17606944	692801	14649929	514219	148352	3.2127e+06	1906.69	3.20204e+06	1912.43	251218	7.78843e+06	44421.6	745500	382504	447936
N2 25°C replicate 3	16817351	1008233	13603694	502483	207772	2.34208e+06	1670.76	2.33487e+06	1597.33	252404	7.55036e+06	46997.3	731145	381295	440083
nhl-2(ok818) 20°C replicate 1	7171910	713373	5677532	173840	54302.2	1.43378e+06	685.49	1.43118e+06	745.98	101598	2.78461e+06	16851.3	226631	133036	163121
nhl-2(ok818) 20°C replicate 2	4474988	493885	3433327	111067	32075.1	737298	385.3	735524	411.75	65013.2	1.78577e+06	10637.7	140442	84390.2	104673
nhl-2(ok818) 20°C replicate 3	4936237	398607	4046015	129356	26815	1.00494e+06	419.92	1.00266e+06	452.88	76590.5	2.07704e+06	12148.2	164203	97690.1	123000
nhl-2(ok818) 25°C replicate 1	10385039	797290	8149064	274521	30741	1.80217e+06	1532.6	1.79908e+06	1405.46	187266	4.45282e+06	21275.4	359858	202394	245645
nhl-2(ok818) 25°C replicate 2	5357386	304946	4328826	133433	20308	1.20428e+06	642.83	1.2014e+06	661.45	101731	2.1796e+06	10534.7	176854	96802.6	121171
nhl-2(ok818) 25°C replicate 3	5854207	77191	749834	24159	3345.38	223441	285.02	223068	143.51	20203.1	359852	1807.22	27096.5	18658.3	21531.1

## Sheet: RNA-seq
Experiment	Total reads	All mapped reads	Uniquely mapped reads
N2 at 20°C replicate 1	20655619	19989188	19497119
N2 at 20°C replicate 2	18982352	18398470	18048457
N2 at 20°C replicate 3	18288753	17737082	17368935
N2 at 25°C replicate 1	21169651	20579617	20057177
N2 at 25°C replicate 2	20728536	20119101	19661316
N2 at 25°C replicate 3	20518246	19868330	19482145
nhl-2 mutants at 20°C replicate 1	19992516	19259149	18921710
nhl-2 mutants at 20°C replicate 2	18518624	17954177	17595786
nhl-2 mutants at 20°C replicate 3	19659613	19034198	18657727
nhl-2 mutants at 25°C replicate 1	18529333	17985941	17590601
nhl-2 mutants at 25°C replicate 2	17662691	17145003	16730580
nhl-2 mutants at 25°C replicate 3	20159433	19558255	19167562
