# Supplementary material for: The TRIM-NHL protein NHL-2 is a co-factor in the nuclear and somatic RNAi pathways in C. elegans
Source: eLife. 2018 Dec 21;7:e35478. doi: 10.7554/eLife.35478 (PMC6351104; doi:10.7554/eLife.35478)
Supplement: Supplementary file 2. [file elife-35478-supp2.xlsx]

## Sheet: gene_lists
Supplementary Table S2	List of genes with altered expression in nhl-2(ok818) at 20°C and 25°C, and genes depleted of 22Gs at either temperature
Depleted of 22G in nhl-2(ok818) 20°C	Up regulated in nhl-2(ok818) 20°C	Down regulated in nhl-2(ok818) 20°C	Depleted of 22G in nhl-2(ok818)25°C	Up regulated in nhl-2(ok818) 25°C	Down regulated in nhl-2(ok818) 25°C
WBGene00000156	WBGene00000002	WBGene00000007	WBGene00000099	WBGene00000001	WBGene00000003
WBGene00000387	WBGene00000013	WBGene00000012	WBGene00000105	WBGene00000002	WBGene00000006
WBGene00000393	WBGene00000018	WBGene00000022	WBGene00000111	WBGene00000010	WBGene00000007
WBGene00000396	WBGene00000090	WBGene00000040	WBGene00000178	WBGene00000013	WBGene00000008
WBGene00000469	WBGene00000103	WBGene00000063	WBGene00000221	WBGene00000018	WBGene00000009
WBGene00000533	WBGene00000137	WBGene00000065	WBGene00000387	WBGene00000056	WBGene00000019
WBGene00000762	WBGene00000213	WBGene00000066	WBGene00000393	WBGene00000075	WBGene00000022
WBGene00000775	WBGene00000253	WBGene00000067	WBGene00000411	WBGene00000079	WBGene00000023
WBGene00000890	WBGene00000257	WBGene00000081	WBGene00000469	WBGene00000083	WBGene00000039
WBGene00000899	WBGene00000273	WBGene00000111	WBGene00000533	WBGene00000090	WBGene00000043
WBGene00000961	WBGene00000301	WBGene00000172	WBGene00000543	WBGene00000094	WBGene00000054
WBGene00000995	WBGene00000372	WBGene00000190	WBGene00000554	WBGene00000098	WBGene00000055
WBGene00001025	WBGene00000373	WBGene00000198	WBGene00000762	WBGene00000099	WBGene00000057
WBGene00001026	WBGene00000387	WBGene00000214	WBGene00000775	WBGene00000101	WBGene00000058
WBGene00001081	WBGene00000396	WBGene00000215	WBGene00000899	WBGene00000106	WBGene00000067
WBGene00001086	WBGene00000413	WBGene00000216	WBGene00000959	WBGene00000113	WBGene00000070
WBGene00001130	WBGene00000415	WBGene00000256	WBGene00001025	WBGene00000115	WBGene00000081
WBGene00001178	WBGene00000421	WBGene00000281	WBGene00001026	WBGene00000116	WBGene00000082
WBGene00001325	WBGene00000430	WBGene00000298	WBGene00001081	WBGene00000117	WBGene00000088
WBGene00001330	WBGene00000435	WBGene00000389	WBGene00001178	WBGene00000120	WBGene00000111
WBGene00001468	WBGene00000453	WBGene00000391	WBGene00001179	WBGene00000121	WBGene00000118
WBGene00001629	WBGene00000460	WBGene00000397	WBGene00001196	WBGene00000123	WBGene00000133
WBGene00001650	WBGene00000461	WBGene00000514	WBGene00001430	WBGene00000137	WBGene00000136
WBGene00001680	WBGene00000462	WBGene00000539	WBGene00001468	WBGene00000140	WBGene00000138
WBGene00001831	WBGene00000463	WBGene00000541	WBGene00001522	WBGene00000144	WBGene00000150
WBGene00001837	WBGene00000469	WBGene00000594	WBGene00001535	WBGene00000155	WBGene00000169
WBGene00001995	WBGene00000478	WBGene00000596	WBGene00001650	WBGene00000156	WBGene00000170
WBGene00002048	WBGene00000482	WBGene00000599	WBGene00001680	WBGene00000157	WBGene00000172
WBGene00002072	WBGene00000503	WBGene00000601	WBGene00001963	WBGene00000160	WBGene00000178
WBGene00002081	WBGene00000535	WBGene00000602	WBGene00001981	WBGene00000161	WBGene00000181
WBGene00002088	WBGene00000557	WBGene00000603	WBGene00001995	WBGene00000162	WBGene00000212
WBGene00002117	WBGene00000558	WBGene00000606	WBGene00002042	WBGene00000165	WBGene00000228
WBGene00002136	WBGene00000561	WBGene00000610	WBGene00002064	WBGene00000168	WBGene00000238
WBGene00002151	WBGene00000630	WBGene00000611	WBGene00002088	WBGene00000171	WBGene00000248
WBGene00002169	WBGene00000664	WBGene00000613	WBGene00002117	WBGene00000186	WBGene00000251
WBGene00002173	WBGene00000670	WBGene00000614	WBGene00002136	WBGene00000190	WBGene00000252
WBGene00002185	WBGene00000675	WBGene00000615	WBGene00002151	WBGene00000192	WBGene00000256
WBGene00002189	WBGene00000690	WBGene00000616	WBGene00002189	WBGene00000197	WBGene00000266
WBGene00002246	WBGene00000695	WBGene00000626	WBGene00002222	WBGene00000213	WBGene00000276
WBGene00002253	WBGene00000731	WBGene00000634	WBGene00002223	WBGene00000217	WBGene00000281
WBGene00002978	WBGene00000870	WBGene00000636	WBGene00002246	WBGene00000227	WBGene00000282
WBGene00003010	WBGene00000884	WBGene00000637	WBGene00002253	WBGene00000231	WBGene00000285
WBGene00003011	WBGene00000898	WBGene00000638	WBGene00002915	WBGene00000239	WBGene00000286
WBGene00003035	WBGene00000961	WBGene00000639	WBGene00002978	WBGene00000249	WBGene00000288
WBGene00003045	WBGene00000989	WBGene00000641	WBGene00003010	WBGene00000250	WBGene00000298
WBGene00003124	WBGene00000995	WBGene00000647	WBGene00003011	WBGene00000253	WBGene00000302
WBGene00003183	WBGene00001045	WBGene00000649	WBGene00003017	WBGene00000254	WBGene00000368
WBGene00003247	WBGene00001059	WBGene00000653	WBGene00003020	WBGene00000257	WBGene00000389
WBGene00003396	WBGene00001075	WBGene00000655	WBGene00003035	WBGene00000264	WBGene00000391
WBGene00003472	WBGene00001076	WBGene00000657	WBGene00003038	WBGene00000265	WBGene00000393
WBGene00003546	WBGene00001080	WBGene00000663	WBGene00003045	WBGene00000271	WBGene00000397
WBGene00003600	WBGene00001086	WBGene00000665	WBGene00003124	WBGene00000273	WBGene00000399
WBGene00003602	WBGene00001087	WBGene00000666	WBGene00003142	WBGene00000274	WBGene00000401
WBGene00003609	WBGene00001103	WBGene00000667	WBGene00003375	WBGene00000275	WBGene00000414
WBGene00003624	WBGene00001104	WBGene00000669	WBGene00003402	WBGene00000289	WBGene00000431
WBGene00003630	WBGene00001105	WBGene00000671	WBGene00003472	WBGene00000294	WBGene00000448
WBGene00003648	WBGene00001160	WBGene00000672	WBGene00003480	WBGene00000301	WBGene00000452
WBGene00003848	WBGene00001165	WBGene00000678	WBGene00003533	WBGene00000366	WBGene00000476
WBGene00003903	WBGene00001186	WBGene00000681	WBGene00003593	WBGene00000367	WBGene00000491
WBGene00003936	WBGene00001249	WBGene00000683	WBGene00003600	WBGene00000369	WBGene00000492
WBGene00003976	WBGene00001258	WBGene00000685	WBGene00003602	WBGene00000372	WBGene00000493
WBGene00004126	WBGene00001365	WBGene00000691	WBGene00003609	WBGene00000373	WBGene00000511
WBGene00004210	WBGene00001377	WBGene00000692	WBGene00003630	WBGene00000376	WBGene00000512
WBGene00004254	WBGene00001387	WBGene00000694	WBGene00003648	WBGene00000377	WBGene00000514
WBGene00004259	WBGene00001395	WBGene00000699	WBGene00003671	WBGene00000383	WBGene00000515
WBGene00004360	WBGene00001432	WBGene00000700	WBGene00003688	WBGene00000386	WBGene00000516
WBGene00004361	WBGene00001435	WBGene00000701	WBGene00003720	WBGene00000387	WBGene00000522
WBGene00004457	WBGene00001436	WBGene00000703	WBGene00003762	WBGene00000388	WBGene00000523
WBGene00004473	WBGene00001437	WBGene00000704	WBGene00003787	WBGene00000396	WBGene00000524
WBGene00004486	WBGene00001440	WBGene00000707	WBGene00003848	WBGene00000403	WBGene00000529
WBGene00004746	WBGene00001470	WBGene00000708	WBGene00003954	WBGene00000405	WBGene00000531
WBGene00004767	WBGene00001477	WBGene00000710	WBGene00003976	WBGene00000406	WBGene00000539
WBGene00004778	WBGene00001484	WBGene00000711	WBGene00004039	WBGene00000407	WBGene00000541
WBGene00004816	WBGene00001491	WBGene00000712	WBGene00004136	WBGene00000411	WBGene00000544
WBGene00004827	WBGene00001493	WBGene00000714	WBGene00004175	WBGene00000413	WBGene00000546
WBGene00004855	WBGene00001500	WBGene00000715	WBGene00004199	WBGene00000415	WBGene00000554
WBGene00004862	WBGene00001544	WBGene00000717	WBGene00004210	WBGene00000416	WBGene00000558
WBGene00004883	WBGene00001546	WBGene00000718	WBGene00004259	WBGene00000417	WBGene00000593
WBGene00004889	WBGene00001565	WBGene00000719	WBGene00004305	WBGene00000418	WBGene00000594
WBGene00004893	WBGene00001577	WBGene00000720	WBGene00004364	WBGene00000420	WBGene00000596
WBGene00004951	WBGene00001583	WBGene00000722	WBGene00004387	WBGene00000422	WBGene00000599
WBGene00004954	WBGene00001591	WBGene00000723	WBGene00004457	WBGene00000423	WBGene00000601
WBGene00005191	WBGene00001688	WBGene00000726	WBGene00004701	WBGene00000439	WBGene00000602
WBGene00005725	WBGene00001693	WBGene00000727	WBGene00004746	WBGene00000444	WBGene00000603
WBGene00006351	WBGene00001711	WBGene00000728	WBGene00004767	WBGene00000451	WBGene00000606
WBGene00006359	WBGene00001767	WBGene00000729	WBGene00004816	WBGene00000453	WBGene00000610
WBGene00006364	WBGene00001820	WBGene00000730	WBGene00004827	WBGene00000459	WBGene00000611
WBGene00006393	WBGene00001828	WBGene00000732	WBGene00004855	WBGene00000460	WBGene00000615
WBGene00006402	WBGene00001830	WBGene00000734	WBGene00004862	WBGene00000461	WBGene00000616
WBGene00006432	WBGene00001833	WBGene00000735	WBGene00004893	WBGene00000462	WBGene00000618
WBGene00006436	WBGene00001841	WBGene00000739	WBGene00004951	WBGene00000463	WBGene00000625
WBGene00006441	WBGene00001853	WBGene00000740	WBGene00004954	WBGene00000465	WBGene00000626
WBGene00006481	WBGene00001854	WBGene00000741	WBGene00005191	WBGene00000469	WBGene00000627
WBGene00006496	WBGene00001857	WBGene00000742	WBGene00005308	WBGene00000473	WBGene00000631
WBGene00006524	WBGene00001858	WBGene00000743	WBGene00005643	WBGene00000474	WBGene00000634
WBGene00006527	WBGene00001898	WBGene00000745	WBGene00005725	WBGene00000478	WBGene00000636
WBGene00006605	WBGene00001949	WBGene00000748	WBGene00006351	WBGene00000479	WBGene00000637
WBGene00006640	WBGene00001960	WBGene00000759	WBGene00006402	WBGene00000480	WBGene00000638
WBGene00006646	WBGene00001963	WBGene00000779	WBGene00006491	WBGene00000482	WBGene00000639
WBGene00006750	WBGene00001976	WBGene00000780	WBGene00006527	WBGene00000496	WBGene00000640
WBGene00006780	WBGene00001980	WBGene00000781	WBGene00006605	WBGene00000498	WBGene00000641
WBGene00006789	WBGene00002078	WBGene00000783	WBGene00006640	WBGene00000499	WBGene00000642
WBGene00006801	WBGene00002085	WBGene00000784	WBGene00006646	WBGene00000503	WBGene00000644
WBGene00006902	WBGene00002102	WBGene00000785	WBGene00006722	WBGene00000506	WBGene00000647
WBGene00007043	WBGene00002117	WBGene00000829	WBGene00006750	WBGene00000507	WBGene00000649
WBGene00007047	WBGene00002124	WBGene00000833	WBGene00006756	WBGene00000519	WBGene00000653
WBGene00007053	WBGene00002125	WBGene00000878	WBGene00006801	WBGene00000527	WBGene00000655
WBGene00007055	WBGene00002188	WBGene00000934	WBGene00006803	WBGene00000530	WBGene00000657
WBGene00007091	WBGene00002233	WBGene00000988	WBGene00006902	WBGene00000532	WBGene00000663
WBGene00007129	WBGene00002240	WBGene00001000	WBGene00006946	WBGene00000534	WBGene00000664
WBGene00007162	WBGene00002246	WBGene00001066	WBGene00007055	WBGene00000535	WBGene00000665
WBGene00007255	WBGene00002248	WBGene00001067	WBGene00007063	WBGene00000545	WBGene00000666
WBGene00007387	WBGene00002252	WBGene00001074	WBGene00007065	WBGene00000547	WBGene00000667
WBGene00007403	WBGene00002263	WBGene00001149	WBGene00007091	WBGene00000548	WBGene00000669
WBGene00007417	WBGene00002282	WBGene00001156	WBGene00007129	WBGene00000549	WBGene00000671
WBGene00007485	WBGene00002637	WBGene00001158	WBGene00007162	WBGene00000557	WBGene00000672
WBGene00007487	WBGene00002889	WBGene00001234	WBGene00007193	WBGene00000564	WBGene00000674
WBGene00007667	WBGene00003001	WBGene00001239	WBGene00007202	WBGene00000565	WBGene00000678
WBGene00007674	WBGene00003002	WBGene00001240	WBGene00007213	WBGene00000566	WBGene00000681
WBGene00007705	WBGene00003045	WBGene00001243	WBGene00007255	WBGene00000591	WBGene00000683
WBGene00007710	WBGene00003055	WBGene00001244	WBGene00007387	WBGene00000592	WBGene00000684
WBGene00007711	WBGene00003071	WBGene00001245	WBGene00007391	WBGene00000597	WBGene00000685
WBGene00007769	WBGene00003072	WBGene00001246	WBGene00007403	WBGene00000609	WBGene00000687
WBGene00007813	WBGene00003089	WBGene00001247	WBGene00007417	WBGene00000646	WBGene00000689
WBGene00007849	WBGene00003111	WBGene00001303	WBGene00007485	WBGene00000661	WBGene00000691
WBGene00007850	WBGene00003112	WBGene00001373	WBGene00007499	WBGene00000670	WBGene00000692
WBGene00007855	WBGene00003133	WBGene00001399	WBGene00007523	WBGene00000673	WBGene00000694
WBGene00007886	WBGene00003210	WBGene00001424	WBGene00007606	WBGene00000675	WBGene00000697
WBGene00007924	WBGene00003233	WBGene00001430	WBGene00007667	WBGene00000677	WBGene00000699
WBGene00007971	WBGene00003367	WBGene00001438	WBGene00007674	WBGene00000690	WBGene00000700
WBGene00007979	WBGene00003377	WBGene00001448	WBGene00007683	WBGene00000693	WBGene00000701
WBGene00008052	WBGene00003402	WBGene00001450	WBGene00007705	WBGene00000708	WBGene00000702
WBGene00008086	WBGene00003473	WBGene00001458	WBGene00007732	WBGene00000713	WBGene00000703
WBGene00008090	WBGene00003522	WBGene00001536	WBGene00007769	WBGene00000716	WBGene00000704
WBGene00008110	WBGene00003530	WBGene00001572	WBGene00007786	WBGene00000731	WBGene00000705
WBGene00008120	WBGene00003585	WBGene00001603	WBGene00007813	WBGene00000751	WBGene00000707
WBGene00008136	WBGene00003595	WBGene00001604	WBGene00007849	WBGene00000752	WBGene00000710
WBGene00008138	WBGene00003601	WBGene00001681	WBGene00007850	WBGene00000770	WBGene00000711
WBGene00008165	WBGene00003605	WBGene00001699	WBGene00007886	WBGene00000772	WBGene00000712
WBGene00008177	WBGene00003614	WBGene00001725	WBGene00007898	WBGene00000774	WBGene00000714
WBGene00008353	WBGene00003702	WBGene00001730	WBGene00007923	WBGene00000776	WBGene00000715
WBGene00008447	WBGene00003766	WBGene00001763	WBGene00007924	WBGene00000786	WBGene00000717
WBGene00008456	WBGene00003767	WBGene00001769	WBGene00007941	WBGene00000794	WBGene00000718
WBGene00008531	WBGene00003769	WBGene00001774	WBGene00007979	WBGene00000799	WBGene00000719
WBGene00008587	WBGene00003772	WBGene00001775	WBGene00008052	WBGene00000800	WBGene00000720
WBGene00008622	WBGene00003778	WBGene00001776	WBGene00008086	WBGene00000803	WBGene00000722
WBGene00008646	WBGene00003792	WBGene00001783	WBGene00008110	WBGene00000804	WBGene00000723
WBGene00008648	WBGene00003794	WBGene00001786	WBGene00008120	WBGene00000812	WBGene00000725
WBGene00008654	WBGene00003798	WBGene00001787	WBGene00008136	WBGene00000813	WBGene00000726
WBGene00008667	WBGene00003828	WBGene00001814	WBGene00008138	WBGene00000816	WBGene00000727
WBGene00008690	WBGene00003858	WBGene00001816	WBGene00008157	WBGene00000818	WBGene00000728
WBGene00008694	WBGene00003879	WBGene00001944	WBGene00008165	WBGene00000834	WBGene00000729
WBGene00008695	WBGene00003919	WBGene00001986	WBGene00008177	WBGene00000836	WBGene00000730
WBGene00008812	WBGene00003965	WBGene00002011	WBGene00008224	WBGene00000837	WBGene00000732
WBGene00008838	WBGene00003970	WBGene00002044	WBGene00008343	WBGene00000838	WBGene00000734
WBGene00008861	WBGene00003977	WBGene00002055	WBGene00008353	WBGene00000840	WBGene00000735
WBGene00008865	WBGene00003983	WBGene00002067	WBGene00008447	WBGene00000846	WBGene00000739
WBGene00008880	WBGene00004077	WBGene00002084	WBGene00008476	WBGene00000865	WBGene00000740
WBGene00008913	WBGene00004095	WBGene00002090	WBGene00008503	WBGene00000868	WBGene00000741
WBGene00008922	WBGene00004132	WBGene00002101	WBGene00008569	WBGene00000870	WBGene00000742
WBGene00008951	WBGene00004140	WBGene00002105	WBGene00008587	WBGene00000871	WBGene00000743
WBGene00009025	WBGene00004148	WBGene00002114	WBGene00008622	WBGene00000872	WBGene00000745
WBGene00009026	WBGene00004152	WBGene00002116	WBGene00008646	WBGene00000874	WBGene00000746
WBGene00009061	WBGene00004166	WBGene00002120	WBGene00008648	WBGene00000875	WBGene00000747
WBGene00009089	WBGene00004179	WBGene00002186	WBGene00008687	WBGene00000876	WBGene00000748
WBGene00009234	WBGene00004187	WBGene00002193	WBGene00008690	WBGene00000884	WBGene00000753
WBGene00009241	WBGene00004203	WBGene00002204	WBGene00008695	WBGene00000886	WBGene00000755
WBGene00009264	WBGene00004204	WBGene00002206	WBGene00008740	WBGene00000897	WBGene00000756
WBGene00009352	WBGene00004208	WBGene00002249	WBGene00008812	WBGene00000898	WBGene00000759
WBGene00009380	WBGene00004209	WBGene00002258	WBGene00008823	WBGene00000900	WBGene00000760
WBGene00009635	WBGene00004215	WBGene00002260	WBGene00008838	WBGene00000905	WBGene00000768
WBGene00009658	WBGene00004216	WBGene00002273	WBGene00008904	WBGene00000908	WBGene00000771
WBGene00009659	WBGene00004224	WBGene00002348	WBGene00008913	WBGene00000911	WBGene00000775
WBGene00009660	WBGene00004227	WBGene00002879	WBGene00008922	WBGene00000913	WBGene00000778
WBGene00009667	WBGene00004234	WBGene00002891	WBGene00009025	WBGene00000914	WBGene00000783
WBGene00009721	WBGene00004236	WBGene00002978	WBGene00009026	WBGene00000917	WBGene00000784
WBGene00009769	WBGene00004259	WBGene00003093	WBGene00009061	WBGene00000935	WBGene00000785
WBGene00009863	WBGene00004335	WBGene00003094	WBGene00009082	WBGene00000962	WBGene00000787
WBGene00009978	WBGene00004355	WBGene00003095	WBGene00009089	WBGene00000968	WBGene00000789
WBGene00010036	WBGene00004371	WBGene00003162	WBGene00009153	WBGene00000974	WBGene00000802
WBGene00010100	WBGene00004383	WBGene00003214	WBGene00009189	WBGene00000980	WBGene00000820
WBGene00010134	WBGene00004728	WBGene00003369	WBGene00009224	WBGene00000989	WBGene00000821
WBGene00010138	WBGene00004732	WBGene00003371	WBGene00009234	WBGene00000990	WBGene00000822
WBGene00010307	WBGene00004737	WBGene00003375	WBGene00009241	WBGene00000995	WBGene00000841
WBGene00010311	WBGene00004745	WBGene00003424	WBGene00009264	WBGene00001002	WBGene00000853
WBGene00010330	WBGene00004747	WBGene00003425	WBGene00009290	WBGene00001016	WBGene00000857
WBGene00010336	WBGene00004765	WBGene00003426	WBGene00009352	WBGene00001023	WBGene00000859
WBGene00010434	WBGene00004771	WBGene00003429	WBGene00009380	WBGene00001031	WBGene00000877
WBGene00010448	WBGene00004782	WBGene00003430	WBGene00009384	WBGene00001041	WBGene00000878
WBGene00010491	WBGene00004786	WBGene00003431	WBGene00009440	WBGene00001045	WBGene00000895
WBGene00010528	WBGene00004813	WBGene00003432	WBGene00009442	WBGene00001049	WBGene00000906
WBGene00010550	WBGene00004814	WBGene00003434	WBGene00009483	WBGene00001050	WBGene00000928
WBGene00010552	WBGene00004815	WBGene00003435	WBGene00009505	WBGene00001051	WBGene00000930
WBGene00010625	WBGene00004816	WBGene00003438	WBGene00009583	WBGene00001056	WBGene00000933
WBGene00010704	WBGene00004818	WBGene00003442	WBGene00009635	WBGene00001058	WBGene00000936
WBGene00010735	WBGene00004819	WBGene00003443	WBGene00009658	WBGene00001059	WBGene00000941
WBGene00010783	WBGene00004820	WBGene00003444	WBGene00009660	WBGene00001061	WBGene00000942
WBGene00010815	WBGene00004821	WBGene00003446	WBGene00009783	WBGene00001068	WBGene00000952
WBGene00010858	WBGene00004827	WBGene00003448	WBGene00009861	WBGene00001073	WBGene00000955
WBGene00010868	WBGene00004855	WBGene00003449	WBGene00009863	WBGene00001075	WBGene00000963
WBGene00010879	WBGene00004857	WBGene00003450	WBGene00009865	WBGene00001076	WBGene00000964
WBGene00010891	WBGene00004873	WBGene00003452	WBGene00009926	WBGene00001077	WBGene00000969
WBGene00010896	WBGene00004874	WBGene00003456	WBGene00009975	WBGene00001078	WBGene00000971
WBGene00010931	WBGene00004890	WBGene00003457	WBGene00010100	WBGene00001080	WBGene00000977
WBGene00010976	WBGene00004905	WBGene00003458	WBGene00010102	WBGene00001081	WBGene00000981
WBGene00011049	WBGene00004947	WBGene00003462	WBGene00010119	WBGene00001082	WBGene00000982
WBGene00011110	WBGene00004998	WBGene00003463	WBGene00010131	WBGene00001085	WBGene00000983
WBGene00011137	WBGene00005008	WBGene00003464	WBGene00010148	WBGene00001086	WBGene00000991
WBGene00011250	WBGene00005023	WBGene00003465	WBGene00010307	WBGene00001087	WBGene00001000
WBGene00011299	WBGene00005657	WBGene00003466	WBGene00010311	WBGene00001088	WBGene00001038
WBGene00011318	WBGene00005949	WBGene00003467	WBGene00010330	WBGene00001093	WBGene00001044
WBGene00011344	WBGene00006063	WBGene00003468	WBGene00010336	WBGene00001102	WBGene00001054
WBGene00011349	WBGene00006308	WBGene00003469	WBGene00010386	WBGene00001103	WBGene00001064
WBGene00011365	WBGene00006324	WBGene00003470	WBGene00010448	WBGene00001104	WBGene00001065
WBGene00011393	WBGene00006331	WBGene00003495	WBGene00010472	WBGene00001110	WBGene00001066
WBGene00011482	WBGene00006366	WBGene00003511	WBGene00010483	WBGene00001130	WBGene00001067
WBGene00011497	WBGene00006379	WBGene00003514	WBGene00010491	WBGene00001148	WBGene00001069
WBGene00011543	WBGene00006380	WBGene00003517	WBGene00010495	WBGene00001156	WBGene00001070
WBGene00011635	WBGene00006418	WBGene00003519	WBGene00010507	WBGene00001160	WBGene00001074
WBGene00011638	WBGene00006498	WBGene00003554	WBGene00010552	WBGene00001161	WBGene00001079
WBGene00011761	WBGene00006523	WBGene00003566	WBGene00010625	WBGene00001164	WBGene00001109
WBGene00011791	WBGene00006538	WBGene00003567	WBGene00010626	WBGene00001165	WBGene00001113
WBGene00011875	WBGene00006545	WBGene00003579	WBGene00010667	WBGene00001166	WBGene00001116
WBGene00011916	WBGene00006547	WBGene00003598	WBGene00010699	WBGene00001173	WBGene00001118
WBGene00012018	WBGene00006552	WBGene00003704	WBGene00010700	WBGene00001175	WBGene00001119
WBGene00012029	WBGene00006556	WBGene00003739	WBGene00010704	WBGene00001186	WBGene00001132
WBGene00012096	WBGene00006557	WBGene00003742	WBGene00010709	WBGene00001193	WBGene00001149
WBGene00012136	WBGene00006559	WBGene00003746	WBGene00010868	WBGene00001196	WBGene00001150
WBGene00012271	WBGene00006575	WBGene00003748	WBGene00010879	WBGene00001209	WBGene00001155
WBGene00012375	WBGene00006592	WBGene00003749	WBGene00010891	WBGene00001215	WBGene00001157
WBGene00012412	WBGene00006602	WBGene00003750	WBGene00010931	WBGene00001224	WBGene00001158
WBGene00012442	WBGene00006611	WBGene00003751	WBGene00010935	WBGene00001253	WBGene00001163
WBGene00012452	WBGene00006641	WBGene00003755	WBGene00010976	WBGene00001258	WBGene00001167
WBGene00012490	WBGene00006705	WBGene00003758	WBGene00011018	WBGene00001259	WBGene00001174
WBGene00012559	WBGene00006775	WBGene00003764	WBGene00011049	WBGene00001281	WBGene00001182
WBGene00012567	WBGene00006776	WBGene00003776	WBGene00011066	WBGene00001309	WBGene00001188
WBGene00012592	WBGene00006778	WBGene00003816	WBGene00011067	WBGene00001320	WBGene00001189
WBGene00012610	WBGene00006816	WBGene00003844	WBGene00011110	WBGene00001324	WBGene00001190
WBGene00012641	WBGene00006870	WBGene00003877	WBGene00011128	WBGene00001329	WBGene00001202
WBGene00012675	WBGene00006902	WBGene00003941	WBGene00011137	WBGene00001334	WBGene00001204
WBGene00012676	WBGene00006938	WBGene00003958	WBGene00011145	WBGene00001335	WBGene00001239
WBGene00012710	WBGene00006941	WBGene00003959	WBGene00011236	WBGene00001365	WBGene00001242
WBGene00012764	WBGene00006956	WBGene00003982	WBGene00011318	WBGene00001372	WBGene00001245
WBGene00012792	WBGene00006962	WBGene00003995	WBGene00011324	WBGene00001377	WBGene00001246
WBGene00012819	WBGene00006981	WBGene00004007	WBGene00011326	WBGene00001401	WBGene00001247
WBGene00012851	WBGene00007027	WBGene00004008	WBGene00011344	WBGene00001404	WBGene00001250
WBGene00012854	WBGene00007028	WBGene00004017	WBGene00011349	WBGene00001412	WBGene00001251
WBGene00012899	WBGene00007030	WBGene00004020	WBGene00011388	WBGene00001428	WBGene00001330
WBGene00012944	WBGene00007042	WBGene00004023	WBGene00011393	WBGene00001430	WBGene00001371
WBGene00012961	WBGene00007053	WBGene00004026	WBGene00011399	WBGene00001431	WBGene00001373
WBGene00013139	WBGene00007103	WBGene00004062	WBGene00011482	WBGene00001432	WBGene00001374
WBGene00013196	WBGene00007140	WBGene00004076	WBGene00011497	WBGene00001435	WBGene00001390
WBGene00013218	WBGene00007182	WBGene00004100	WBGene00011511	WBGene00001436	WBGene00001391
WBGene00013259	WBGene00007211	WBGene00004114	WBGene00011527	WBGene00001437	WBGene00001392
WBGene00013288	WBGene00007214	WBGene00004154	WBGene00011576	WBGene00001438	WBGene00001399
WBGene00013321	WBGene00007302	WBGene00004165	WBGene00011591	WBGene00001444	WBGene00001403
WBGene00013327	WBGene00007321	WBGene00004173	WBGene00011635	WBGene00001470	WBGene00001424
WBGene00013353	WBGene00007324	WBGene00004300	WBGene00011742	WBGene00001478	WBGene00001429
WBGene00013362	WBGene00007351	WBGene00004394	WBGene00011761	WBGene00001481	WBGene00001447
WBGene00013365	WBGene00007365	WBGene00004397	WBGene00011791	WBGene00001482	WBGene00001448
WBGene00013408	WBGene00007375	WBGene00004419	WBGene00011860	WBGene00001484	WBGene00001450
WBGene00013446	WBGene00007384	WBGene00004471	WBGene00011864	WBGene00001485	WBGene00001452
WBGene00013500	WBGene00007433	WBGene00004473	WBGene00011875	WBGene00001488	WBGene00001453
WBGene00013501	WBGene00007479	WBGene00004811	WBGene00012014	WBGene00001491	WBGene00001458
WBGene00013578	WBGene00007501	WBGene00004875	WBGene00012033	WBGene00001492	WBGene00001459
WBGene00013599	WBGene00007525	WBGene00004901	WBGene00012102	WBGene00001495	WBGene00001463
WBGene00013698	WBGene00007533	WBGene00004904	WBGene00012112	WBGene00001499	WBGene00001464
WBGene00013779	WBGene00007560	WBGene00004909	WBGene00012151	WBGene00001500	WBGene00001465
WBGene00013816	WBGene00007588	WBGene00004952	WBGene00012196	WBGene00001510	WBGene00001466
WBGene00014027	WBGene00007598	WBGene00004958	WBGene00012227	WBGene00001511	WBGene00001468
WBGene00014041	WBGene00007642	WBGene00004960	WBGene00012238	WBGene00001513	WBGene00001476
WBGene00014061	WBGene00007682	WBGene00004962	WBGene00012239	WBGene00001514	WBGene00001480
WBGene00014063	WBGene00007687	WBGene00004964	WBGene00012290	WBGene00001527	WBGene00001487
WBGene00014064	WBGene00007691	WBGene00004965	WBGene00012393	WBGene00001536	WBGene00001506
WBGene00014090	WBGene00007758	WBGene00004966	WBGene00012407	WBGene00001538	WBGene00001508
WBGene00014099	WBGene00007761	WBGene00004969	WBGene00012442	WBGene00001546	WBGene00001519
WBGene00014109	WBGene00007765	WBGene00004971	WBGene00012452	WBGene00001562	WBGene00001523
WBGene00014139	WBGene00007772	WBGene00004973	WBGene00012490	WBGene00001563	WBGene00001564
WBGene00014148	WBGene00007789	WBGene00005003	WBGene00012565	WBGene00001565	WBGene00001570
WBGene00014213	WBGene00007833	WBGene00005005	WBGene00012566	WBGene00001568	WBGene00001572
WBGene00014227	WBGene00007961	WBGene00005012	WBGene00012576	WBGene00001569	WBGene00001592
WBGene00014230	WBGene00007982	WBGene00005016	WBGene00012610	WBGene00001574	WBGene00001594
WBGene00014801	WBGene00007983	WBGene00005188	WBGene00012632	WBGene00001578	WBGene00001603
WBGene00015064	WBGene00007989	WBGene00005552	WBGene00012640	WBGene00001579	WBGene00001604
WBGene00015099	WBGene00007990	WBGene00005655	WBGene00012710	WBGene00001583	WBGene00001608
WBGene00015111	WBGene00007992	WBGene00005703	WBGene00012792	WBGene00001589	WBGene00001613
WBGene00015145	WBGene00008016	WBGene00006038	WBGene00012819	WBGene00001595	WBGene00001623
WBGene00015159	WBGene00008066	WBGene00006039	WBGene00012848	WBGene00001596	WBGene00001643
WBGene00015203	WBGene00008070	WBGene00006040	WBGene00012851	WBGene00001597	WBGene00001644
WBGene00015250	WBGene00008080	WBGene00006044	WBGene00012854	WBGene00001598	WBGene00001663
WBGene00015321	WBGene00008102	WBGene00006047	WBGene00012899	WBGene00001599	WBGene00001680
WBGene00015350	WBGene00008138	WBGene00006048	WBGene00012911	WBGene00001600	WBGene00001681
WBGene00015353	WBGene00008145	WBGene00006049	WBGene00012944	WBGene00001601	WBGene00001691
WBGene00015357	WBGene00008183	WBGene00006050	WBGene00013139	WBGene00001606	WBGene00001695
WBGene00015404	WBGene00008195	WBGene00006051	WBGene00013218	WBGene00001607	WBGene00001701
WBGene00015430	WBGene00008252	WBGene00006052	WBGene00013255	WBGene00001609	WBGene00001703
WBGene00015431	WBGene00008294	WBGene00006053	WBGene00013259	WBGene00001612	WBGene00001704
WBGene00015485	WBGene00008295	WBGene00006056	WBGene00013288	WBGene00001620	WBGene00001710
WBGene00015547	WBGene00008314	WBGene00006057	WBGene00013301	WBGene00001628	WBGene00001713
WBGene00015565	WBGene00008390	WBGene00006058	WBGene00013321	WBGene00001632	WBGene00001714
WBGene00015567	WBGene00008412	WBGene00006272	WBGene00013327	WBGene00001633	WBGene00001716
WBGene00015733	WBGene00008439	WBGene00006351	WBGene00013362	WBGene00001645	WBGene00001724
WBGene00015742	WBGene00008476	WBGene00006404	WBGene00013370	WBGene00001647	WBGene00001725
WBGene00015791	WBGene00008522	WBGene00006408	WBGene00013373	WBGene00001648	WBGene00001730
WBGene00015841	WBGene00008538	WBGene00006409	WBGene00013403	WBGene00001678	WBGene00001736
WBGene00015885	WBGene00008563	WBGene00006416	WBGene00013408	WBGene00001679	WBGene00001740
WBGene00015914	WBGene00008565	WBGene00006449	WBGene00013446	WBGene00001683	WBGene00001750
WBGene00015955	WBGene00008584	WBGene00006509	WBGene00013500	WBGene00001686	WBGene00001754
WBGene00015963	WBGene00008589	WBGene00006510	WBGene00013501	WBGene00001688	WBGene00001769
WBGene00015975	WBGene00008596	WBGene00006530	WBGene00013599	WBGene00001692	WBGene00001771
WBGene00016012	WBGene00008611	WBGene00006539	WBGene00013623	WBGene00001693	WBGene00001776
WBGene00016020	WBGene00008612	WBGene00006553	WBGene00013653	WBGene00001708	WBGene00001783
WBGene00016030	WBGene00008613	WBGene00006584	WBGene00013698	WBGene00001709	WBGene00001786
WBGene00016056	WBGene00008680	WBGene00006586	WBGene00013755	WBGene00001746	WBGene00001795
WBGene00016062	WBGene00008682	WBGene00006589	WBGene00013816	WBGene00001753	WBGene00001796
WBGene00016067	WBGene00008710	WBGene00006628	WBGene00013857	WBGene00001760	WBGene00001803
WBGene00016070	WBGene00008714	WBGene00006679	WBGene00013963	WBGene00001761	WBGene00001806
WBGene00016071	WBGene00008719	WBGene00006719	WBGene00013982	WBGene00001764	WBGene00001814
WBGene00016076	WBGene00008732	WBGene00006819	WBGene00014013	WBGene00001767	WBGene00001816
WBGene00016110	WBGene00008748	WBGene00006824	WBGene00014027	WBGene00001777	WBGene00001817
WBGene00016121	WBGene00008760	WBGene00006863	WBGene00014041	WBGene00001790	WBGene00001819
WBGene00016131	WBGene00008782	WBGene00006910	WBGene00014044	WBGene00001792	WBGene00001839
WBGene00016170	WBGene00008784	WBGene00006911	WBGene00014061	WBGene00001793	WBGene00001883
WBGene00016229	WBGene00008800	WBGene00006913	WBGene00014063	WBGene00001808	WBGene00001884
WBGene00016235	WBGene00008822	WBGene00006915	WBGene00014064	WBGene00001812	WBGene00001885
WBGene00016246	WBGene00008847	WBGene00006917	WBGene00014090	WBGene00001820	WBGene00001887
WBGene00016295	WBGene00008851	WBGene00006918	WBGene00014099	WBGene00001821	WBGene00001888
WBGene00016299	WBGene00008862	WBGene00006919	WBGene00014109	WBGene00001827	WBGene00001889
WBGene00016307	WBGene00008905	WBGene00006921	WBGene00014118	WBGene00001828	WBGene00001899
WBGene00016340	WBGene00008958	WBGene00007072	WBGene00014199	WBGene00001829	WBGene00001900
WBGene00016344	WBGene00008964	WBGene00007080	WBGene00014213	WBGene00001831	WBGene00001911
WBGene00016345	WBGene00008971	WBGene00007081	WBGene00014227	WBGene00001832	WBGene00001916
WBGene00016376	WBGene00009029	WBGene00007082	WBGene00014235	WBGene00001833	WBGene00001918
WBGene00016402	WBGene00009041	WBGene00007097	WBGene00014807	WBGene00001834	WBGene00001944
WBGene00016486	WBGene00009089	WBGene00007112	WBGene00015014	WBGene00001836	WBGene00001945
WBGene00016490	WBGene00009123	WBGene00007134	WBGene00015037	WBGene00001838	WBGene00001948
WBGene00016520	WBGene00009133	WBGene00007138	WBGene00015064	WBGene00001840	WBGene00001955
WBGene00016553	WBGene00009156	WBGene00007155	WBGene00015099	WBGene00001841	WBGene00001984
WBGene00016566	WBGene00009202	WBGene00007156	WBGene00015105	WBGene00001843	WBGene00001986
WBGene00016614	WBGene00009212	WBGene00007159	WBGene00015111	WBGene00001852	WBGene00001989
WBGene00016617	WBGene00009226	WBGene00007185	WBGene00015112	WBGene00001853	WBGene00001990
WBGene00016620	WBGene00009261	WBGene00007190	WBGene00015145	WBGene00001854	WBGene00001991
WBGene00016635	WBGene00009285	WBGene00007196	WBGene00015159	WBGene00001855	WBGene00002007
WBGene00016641	WBGene00009297	WBGene00007209	WBGene00015203	WBGene00001856	WBGene00002030
WBGene00016695	WBGene00009311	WBGene00007232	WBGene00015206	WBGene00001858	WBGene00002039
WBGene00016710	WBGene00009314	WBGene00007239	WBGene00015321	WBGene00001860	WBGene00002041
WBGene00016816	WBGene00009368	WBGene00007248	WBGene00015326	WBGene00001865	WBGene00002045
WBGene00016842	WBGene00009381	WBGene00007274	WBGene00015350	WBGene00001869	WBGene00002048
WBGene00016871	WBGene00009431	WBGene00007300	WBGene00015404	WBGene00001874	WBGene00002054
WBGene00016880	WBGene00009460	WBGene00007301	WBGene00015430	WBGene00001898	WBGene00002055
WBGene00016885	WBGene00009488	WBGene00007305	WBGene00015431	WBGene00001905	WBGene00002056
WBGene00016935	WBGene00009503	WBGene00007306	WBGene00015478	WBGene00001906	WBGene00002057
WBGene00016987	WBGene00009537	WBGene00007307	WBGene00015485	WBGene00001920	WBGene00002058
WBGene00016995	WBGene00009539	WBGene00007308	WBGene00015502	WBGene00001921	WBGene00002065
WBGene00017007	WBGene00009546	WBGene00007320	WBGene00015547	WBGene00001922	WBGene00002067
WBGene00017070	WBGene00009573	WBGene00007336	WBGene00015623	WBGene00001929	WBGene00002069
WBGene00017158	WBGene00009617	WBGene00007337	WBGene00015733	WBGene00001930	WBGene00002084
WBGene00017161	WBGene00009647	WBGene00007354	WBGene00015771	WBGene00001931	WBGene00002094
WBGene00017182	WBGene00009653	WBGene00007388	WBGene00015807	WBGene00001932	WBGene00002095
WBGene00017190	WBGene00009658	WBGene00007394	WBGene00015814	WBGene00001934	WBGene00002101
WBGene00017239	WBGene00009696	WBGene00007408	WBGene00015819	WBGene00001936	WBGene00002103
WBGene00017252	WBGene00009698	WBGene00007422	WBGene00015885	WBGene00001937	WBGene00002106
WBGene00017284	WBGene00009722	WBGene00007431	WBGene00015888	WBGene00001938	WBGene00002114
WBGene00017311	WBGene00009723	WBGene00007448	WBGene00015895	WBGene00001939	WBGene00002120
WBGene00017344	WBGene00009724	WBGene00007457	WBGene00015914	WBGene00001940	WBGene00002123
WBGene00017348	WBGene00009729	WBGene00007463	WBGene00015963	WBGene00001941	WBGene00002137
WBGene00017357	WBGene00009773	WBGene00007474	WBGene00015975	WBGene00001942	WBGene00002138
WBGene00017405	WBGene00009791	WBGene00007478	WBGene00015989	WBGene00001946	WBGene00002139
WBGene00017422	WBGene00009861	WBGene00007495	WBGene00016020	WBGene00001949	WBGene00002140
WBGene00017423	WBGene00009895	WBGene00007507	WBGene00016056	WBGene00001950	WBGene00002142
WBGene00017450	WBGene00009898	WBGene00007537	WBGene00016062	WBGene00001977	WBGene00002146
WBGene00017472	WBGene00009899	WBGene00007541	WBGene00016067	WBGene00001979	WBGene00002174
WBGene00017532	WBGene00009926	WBGene00007543	WBGene00016070	WBGene00001980	WBGene00002179
WBGene00017546	WBGene00009939	WBGene00007544	WBGene00016071	WBGene00001981	WBGene00002186
WBGene00017571	WBGene00009951	WBGene00007549	WBGene00016076	WBGene00001985	WBGene00002187
WBGene00017587	WBGene00009957	WBGene00007559	WBGene00016088	WBGene00001994	WBGene00002193
WBGene00017612	WBGene00009963	WBGene00007565	WBGene00016110	WBGene00001996	WBGene00002198
WBGene00017639	WBGene00010006	WBGene00007570	WBGene00016116	WBGene00001998	WBGene00002200
WBGene00017698	WBGene00010033	WBGene00007584	WBGene00016118	WBGene00001999	WBGene00002204
WBGene00017711	WBGene00010066	WBGene00007601	WBGene00016121	WBGene00002000	WBGene00002206
WBGene00017712	WBGene00010093	WBGene00007604	WBGene00016159	WBGene00002003	WBGene00002208
WBGene00017775	WBGene00010099	WBGene00007605	WBGene00016162	WBGene00002004	WBGene00002212
WBGene00017900	WBGene00010101	WBGene00007608	WBGene00016170	WBGene00002005	WBGene00002222
WBGene00017911	WBGene00010104	WBGene00007610	WBGene00016229	WBGene00002012	WBGene00002227
WBGene00017942	WBGene00010105	WBGene00007613	WBGene00016235	WBGene00002015	WBGene00002232
WBGene00017947	WBGene00010106	WBGene00007630	WBGene00016246	WBGene00002016	WBGene00002234
WBGene00017954	WBGene00010142	WBGene00007633	WBGene00016263	WBGene00002017	WBGene00002243
WBGene00017967	WBGene00010149	WBGene00007639	WBGene00016295	WBGene00002019	WBGene00002257
WBGene00018005	WBGene00010158	WBGene00007655	WBGene00016307	WBGene00002020	WBGene00002259
WBGene00018009	WBGene00010174	WBGene00007658	WBGene00016309	WBGene00002024	WBGene00002261
WBGene00018016	WBGene00010199	WBGene00007659	WBGene00016345	WBGene00002027	WBGene00002265
WBGene00018021	WBGene00010219	WBGene00007662	WBGene00016349	WBGene00002028	WBGene00002274
WBGene00018033	WBGene00010234	WBGene00007714	WBGene00016384	WBGene00002029	WBGene00002975
WBGene00018044	WBGene00010285	WBGene00007726	WBGene00016400	WBGene00002031	WBGene00002979
WBGene00018137	WBGene00010321	WBGene00007733	WBGene00016402	WBGene00002034	WBGene00003003
WBGene00018150	WBGene00010365	WBGene00007763	WBGene00016406	WBGene00002036	WBGene00003006
WBGene00018181	WBGene00010411	WBGene00007777	WBGene00016455	WBGene00002047	WBGene00003029
WBGene00018186	WBGene00010461	WBGene00007778	WBGene00016457	WBGene00002061	WBGene00003031
WBGene00018204	WBGene00010475	WBGene00007793	WBGene00016490	WBGene00002066	WBGene00003033
WBGene00018220	WBGene00010493	WBGene00007794	WBGene00016520	WBGene00002068	WBGene00003057
WBGene00018222	WBGene00010504	WBGene00007795	WBGene00016553	WBGene00002073	WBGene00003063
WBGene00018229	WBGene00010519	WBGene00007808	WBGene00016614	WBGene00002075	WBGene00003089
WBGene00018252	WBGene00010573	WBGene00007812	WBGene00016620	WBGene00002076	WBGene00003092
WBGene00018363	WBGene00010585	WBGene00007817	WBGene00016630	WBGene00002077	WBGene00003093
WBGene00018366	WBGene00010642	WBGene00007818	WBGene00016635	WBGene00002078	WBGene00003094
WBGene00018433	WBGene00010658	WBGene00007848	WBGene00016641	WBGene00002079	WBGene00003095
WBGene00018436	WBGene00010689	WBGene00007857	WBGene00016695	WBGene00002102	WBGene00003102
WBGene00018442	WBGene00010706	WBGene00007866	WBGene00016697	WBGene00002117	WBGene00003104
WBGene00018452	WBGene00010726	WBGene00007872	WBGene00016737	WBGene00002118	WBGene00003106
WBGene00018456	WBGene00010738	WBGene00007873	WBGene00016763	WBGene00002124	WBGene00003166
WBGene00018458	WBGene00010776	WBGene00007909	WBGene00016842	WBGene00002125	WBGene00003173
WBGene00018479	WBGene00010785	WBGene00007926	WBGene00016866	WBGene00002130	WBGene00003178
WBGene00018481	WBGene00010792	WBGene00007959	WBGene00016871	WBGene00002131	WBGene00003242
WBGene00018511	WBGene00010796	WBGene00007969	WBGene00016885	WBGene00002136	WBGene00003369
WBGene00018532	WBGene00010808	WBGene00007977	WBGene00016948	WBGene00002141	WBGene00003371
WBGene00018606	WBGene00010827	WBGene00007984	WBGene00016993	WBGene00002143	WBGene00003375
WBGene00018615	WBGene00010893	WBGene00007986	WBGene00017007	WBGene00002144	WBGene00003376
WBGene00018661	WBGene00010899	WBGene00007987	WBGene00017070	WBGene00002148	WBGene00003388
WBGene00018688	WBGene00010931	WBGene00007999	WBGene00017182	WBGene00002150	WBGene00003403
WBGene00018690	WBGene00010953	WBGene00008001	WBGene00017226	WBGene00002151	WBGene00003409
WBGene00018704	WBGene00011016	WBGene00008028	WBGene00017235	WBGene00002163	WBGene00003424
WBGene00018711	WBGene00011049	WBGene00008029	WBGene00017252	WBGene00002169	WBGene00003425
WBGene00018712	WBGene00011101	WBGene00008043	WBGene00017284	WBGene00002180	WBGene00003426
WBGene00018743	WBGene00011107	WBGene00008063	WBGene00017311	WBGene00002190	WBGene00003429
WBGene00018750	WBGene00011185	WBGene00008074	WBGene00017344	WBGene00002192	WBGene00003430
WBGene00018764	WBGene00011229	WBGene00008075	WBGene00017348	WBGene00002215	WBGene00003431
WBGene00018797	WBGene00011231	WBGene00008096	WBGene00017380	WBGene00002219	WBGene00003432
WBGene00018853	WBGene00011240	WBGene00008123	WBGene00017405	WBGene00002220	WBGene00003434
WBGene00018862	WBGene00011267	WBGene00008124	WBGene00017422	WBGene00002221	WBGene00003435
WBGene00018897	WBGene00011278	WBGene00008125	WBGene00017423	WBGene00002225	WBGene00003438
WBGene00018943	WBGene00011345	WBGene00008154	WBGene00017432	WBGene00002226	WBGene00003442
WBGene00019003	WBGene00011362	WBGene00008175	WBGene00017433	WBGene00002228	WBGene00003443
WBGene00019037	WBGene00011383	WBGene00008199	WBGene00017532	WBGene00002229	WBGene00003444
WBGene00019043	WBGene00011393	WBGene00008201	WBGene00017533	WBGene00002231	WBGene00003446
WBGene00019125	WBGene00011418	WBGene00008202	WBGene00017538	WBGene00002240	WBGene00003448
WBGene00019132	WBGene00011427	WBGene00008205	WBGene00017571	WBGene00002245	WBGene00003449
WBGene00019153	WBGene00011432	WBGene00008212	WBGene00017582	WBGene00002246	WBGene00003450
WBGene00019266	WBGene00011445	WBGene00008215	WBGene00017612	WBGene00002248	WBGene00003452
WBGene00019274	WBGene00011456	WBGene00008216	WBGene00017639	WBGene00002251	WBGene00003456
WBGene00019365	WBGene00011475	WBGene00008230	WBGene00017654	WBGene00002260	WBGene00003457
WBGene00019414	WBGene00011508	WBGene00008235	WBGene00017681	WBGene00002263	WBGene00003458
WBGene00019420	WBGene00011509	WBGene00008244	WBGene00017711	WBGene00002267	WBGene00003462
WBGene00019441	WBGene00011517	WBGene00008245	WBGene00017724	WBGene00002269	WBGene00003463
WBGene00019491	WBGene00011562	WBGene00008255	WBGene00017767	WBGene00002275	WBGene00003464
WBGene00019517	WBGene00011573	WBGene00008259	WBGene00017775	WBGene00002276	WBGene00003465
WBGene00019577	WBGene00011582	WBGene00008267	WBGene00017900	WBGene00002297	WBGene00003466
WBGene00019589	WBGene00011596	WBGene00008269	WBGene00017911	WBGene00002324	WBGene00003467
WBGene00019624	WBGene00011605	WBGene00008287	WBGene00017930	WBGene00002368	WBGene00003468
WBGene00019666	WBGene00011613	WBGene00008298	WBGene00017941	WBGene00002497	WBGene00003469
WBGene00019700	WBGene00011629	WBGene00008299	WBGene00017942	WBGene00002583	WBGene00003470
WBGene00019704	WBGene00011672	WBGene00008302	WBGene00017954	WBGene00002637	WBGene00003471
WBGene00019705	WBGene00011675	WBGene00008312	WBGene00017967	WBGene00002717	WBGene00003482
WBGene00019729	WBGene00011699	WBGene00008313	WBGene00017990	WBGene00002827	WBGene00003495
WBGene00019735	WBGene00011704	WBGene00008354	WBGene00018005	WBGene00002845	WBGene00003511
WBGene00019748	WBGene00011723	WBGene00008383	WBGene00018009	WBGene00002889	WBGene00003523
WBGene00019814	WBGene00011725	WBGene00008408	WBGene00018016	WBGene00002915	WBGene00003524
WBGene00019816	WBGene00011763	WBGene00008423	WBGene00018021	WBGene00002957	WBGene00003526
WBGene00019854	WBGene00011791	WBGene00008433	WBGene00018052	WBGene00002982	WBGene00003529
WBGene00019863	WBGene00011797	WBGene00008448	WBGene00018106	WBGene00002988	WBGene00003532
WBGene00019922	WBGene00011799	WBGene00008477	WBGene00018137	WBGene00002989	WBGene00003536
WBGene00020028	WBGene00011833	WBGene00008482	WBGene00018150	WBGene00002992	WBGene00003538
WBGene00020096	WBGene00011848	WBGene00008483	WBGene00018181	WBGene00002994	WBGene00003541
WBGene00020131	WBGene00011906	WBGene00008495	WBGene00018186	WBGene00002996	WBGene00003542
WBGene00020135	WBGene00011979	WBGene00008506	WBGene00018204	WBGene00002997	WBGene00003543
WBGene00020169	WBGene00011980	WBGene00008508	WBGene00018220	WBGene00002998	WBGene00003545
WBGene00020207	WBGene00011984	WBGene00008529	WBGene00018222	WBGene00003001	WBGene00003547
WBGene00020264	WBGene00012009	WBGene00008541	WBGene00018229	WBGene00003002	WBGene00003548
WBGene00020290	WBGene00012021	WBGene00008553	WBGene00018252	WBGene00003010	WBGene00003549
WBGene00020306	WBGene00012038	WBGene00008560	WBGene00018337	WBGene00003012	WBGene00003551
WBGene00020314	WBGene00012041	WBGene00008579	WBGene00018363	WBGene00003014	WBGene00003552
WBGene00020371	WBGene00012063	WBGene00008581	WBGene00018366	WBGene00003021	WBGene00003554
WBGene00020375	WBGene00012064	WBGene00008590	WBGene00018390	WBGene00003022	WBGene00003562
WBGene00020450	WBGene00012065	WBGene00008594	WBGene00018422	WBGene00003025	WBGene00003563
WBGene00020455	WBGene00012066	WBGene00008631	WBGene00018433	WBGene00003026	WBGene00003564
WBGene00020456	WBGene00012096	WBGene00008634	WBGene00018436	WBGene00003036	WBGene00003565
WBGene00020473	WBGene00012101	WBGene00008656	WBGene00018437	WBGene00003037	WBGene00003566
WBGene00020517	WBGene00012103	WBGene00008659	WBGene00018442	WBGene00003040	WBGene00003567
WBGene00020537	WBGene00012113	WBGene00008660	WBGene00018456	WBGene00003043	WBGene00003579
WBGene00020543	WBGene00012140	WBGene00008688	WBGene00018479	WBGene00003047	WBGene00003580
WBGene00020572	WBGene00012175	WBGene00008698	WBGene00018490	WBGene00003048	WBGene00003590
WBGene00020612	WBGene00012186	WBGene00008699	WBGene00018511	WBGene00003055	WBGene00003596
WBGene00020666	WBGene00012198	WBGene00008707	WBGene00018532	WBGene00003060	WBGene00003597
WBGene00020669	WBGene00012226	WBGene00008709	WBGene00018572	WBGene00003071	WBGene00003598
WBGene00020673	WBGene00012238	WBGene00008724	WBGene00018575	WBGene00003072	WBGene00003602
WBGene00020677	WBGene00012239	WBGene00008743	WBGene00018577	WBGene00003083	WBGene00003605
WBGene00020754	WBGene00012243	WBGene00008754	WBGene00018593	WBGene00003085	WBGene00003607
WBGene00020756	WBGene00012261	WBGene00008772	WBGene00018606	WBGene00003086	WBGene00003617
WBGene00020767	WBGene00012317	WBGene00008801	WBGene00018615	WBGene00003091	WBGene00003625
WBGene00020778	WBGene00012326	WBGene00008811	WBGene00018622	WBGene00003096	WBGene00003626
WBGene00020782	WBGene00012335	WBGene00008820	WBGene00018634	WBGene00003111	WBGene00003634
WBGene00020817	WBGene00012404	WBGene00008840	WBGene00018659	WBGene00003133	WBGene00003635
WBGene00020834	WBGene00012420	WBGene00008841	WBGene00018661	WBGene00003134	WBGene00003643
WBGene00020852	WBGene00012444	WBGene00008865	WBGene00018667	WBGene00003150	WBGene00003645
WBGene00021068	WBGene00012448	WBGene00008891	WBGene00018688	WBGene00003151	WBGene00003647
WBGene00021274	WBGene00012458	WBGene00008897	WBGene00018690	WBGene00003153	WBGene00003650
WBGene00021344	WBGene00012573	WBGene00008912	WBGene00018704	WBGene00003154	WBGene00003658
WBGene00021391	WBGene00012583	WBGene00008917	WBGene00018711	WBGene00003155	WBGene00003660
WBGene00021483	WBGene00012663	WBGene00008935	WBGene00018712	WBGene00003156	WBGene00003684
WBGene00021542	WBGene00012767	WBGene00008950	WBGene00018743	WBGene00003157	WBGene00003685
WBGene00021589	WBGene00012777	WBGene00008973	WBGene00018750	WBGene00003158	WBGene00003689
WBGene00021677	WBGene00012796	WBGene00008986	WBGene00018764	WBGene00003159	WBGene00003691
WBGene00021709	WBGene00012810	WBGene00009016	WBGene00018797	WBGene00003161	WBGene00003696
WBGene00021749	WBGene00012825	WBGene00009028	WBGene00018845	WBGene00003164	WBGene00003697
WBGene00021843	WBGene00012841	WBGene00009030	WBGene00018853	WBGene00003167	WBGene00003698
WBGene00021912	WBGene00012844	WBGene00009031	WBGene00018856	WBGene00003177	WBGene00003699
WBGene00021966	WBGene00012851	WBGene00009039	WBGene00018862	WBGene00003183	WBGene00003700
WBGene00022230	WBGene00012899	WBGene00009042	WBGene00018894	WBGene00003184	WBGene00003704
WBGene00022239	WBGene00012916	WBGene00009043	WBGene00018897	WBGene00003185	WBGene00003705
WBGene00022248	WBGene00012936	WBGene00009048	WBGene00018959	WBGene00003196	WBGene00003706
WBGene00022262	WBGene00012959	WBGene00009049	WBGene00019003	WBGene00003210	WBGene00003707
WBGene00022277	WBGene00012961	WBGene00009057	WBGene00019009	WBGene00003218	WBGene00003711
WBGene00022292	WBGene00012980	WBGene00009079	WBGene00019035	WBGene00003219	WBGene00003720
WBGene00022354	WBGene00012982	WBGene00009090	WBGene00019043	WBGene00003220	WBGene00003723
WBGene00022372	WBGene00013006	WBGene00009097	WBGene00019125	WBGene00003222	WBGene00003724
WBGene00022389	WBGene00013007	WBGene00009143	WBGene00019127	WBGene00003224	WBGene00003725
WBGene00022393	WBGene00013008	WBGene00009146	WBGene00019132	WBGene00003228	WBGene00003729
WBGene00022416	WBGene00013082	WBGene00009149	WBGene00019141	WBGene00003229	WBGene00003730
WBGene00022438	WBGene00013086	WBGene00009160	WBGene00019167	WBGene00003230	WBGene00003731
WBGene00022446	WBGene00013145	WBGene00009185	WBGene00019174	WBGene00003231	WBGene00003735
WBGene00022486	WBGene00013166	WBGene00009209	WBGene00019196	WBGene00003241	WBGene00003736
WBGene00022523	WBGene00013202	WBGene00009237	WBGene00019221	WBGene00003246	WBGene00003739
WBGene00022532	WBGene00013230	WBGene00009259	WBGene00019243	WBGene00003253	WBGene00003742
WBGene00022559	WBGene00013233	WBGene00009293	WBGene00019266	WBGene00003258	WBGene00003746
WBGene00022560	WBGene00013234	WBGene00009308	WBGene00019282	WBGene00003367	WBGene00003748
WBGene00022677	WBGene00013240	WBGene00009313	WBGene00019311	WBGene00003368	WBGene00003749
WBGene00022689	WBGene00013278	WBGene00009321	WBGene00019313	WBGene00003372	WBGene00003750
WBGene00022697	WBGene00013280	WBGene00009324	WBGene00019365	WBGene00003373	WBGene00003751
WBGene00022717	WBGene00013334	WBGene00009331	WBGene00019401	WBGene00003377	WBGene00003755
WBGene00022745	WBGene00013370	WBGene00009344	WBGene00019414	WBGene00003380	WBGene00003758
WBGene00023491	WBGene00013403	WBGene00009360	WBGene00019417	WBGene00003384	WBGene00003762
WBGene00044034	WBGene00013404	WBGene00009377	WBGene00019420	WBGene00003389	WBGene00003763
WBGene00044134	WBGene00013408	WBGene00009388	WBGene00019435	WBGene00003390	WBGene00003764
WBGene00044149	WBGene00013416	WBGene00009393	WBGene00019441	WBGene00003392	WBGene00003766
WBGene00044197	WBGene00013465	WBGene00009401	WBGene00019491	WBGene00003393	WBGene00003767
WBGene00044281	WBGene00013480	WBGene00009402	WBGene00019511	WBGene00003395	WBGene00003768
WBGene00044325	WBGene00013481	WBGene00009416	WBGene00019517	WBGene00003396	WBGene00003769
WBGene00044371	WBGene00013484	WBGene00009432	WBGene00019528	WBGene00003397	WBGene00003771
WBGene00044372	WBGene00013500	WBGene00009446	WBGene00019542	WBGene00003404	WBGene00003779
WBGene00044440	WBGene00013501	WBGene00009457	WBGene00019578	WBGene00003405	WBGene00003786
WBGene00044443	WBGene00013508	WBGene00009459	WBGene00019589	WBGene00003406	WBGene00003812
WBGene00044503	WBGene00013511	WBGene00009463	WBGene00019591	WBGene00003408	WBGene00003813
WBGene00044608	WBGene00013527	WBGene00009470	WBGene00019593	WBGene00003410	WBGene00003816
WBGene00044692	WBGene00013583	WBGene00009473	WBGene00019598	WBGene00003412	WBGene00003821
WBGene00044693	WBGene00013591	WBGene00009481	WBGene00019624	WBGene00003413	WBGene00003839
WBGene00044720	WBGene00013654	WBGene00009483	WBGene00019638	WBGene00003414	WBGene00003842
WBGene00044784	WBGene00013698	WBGene00009492	WBGene00019700	WBGene00003417	WBGene00003843
WBGene00044989	WBGene00013721	WBGene00009493	WBGene00019702	WBGene00003422	WBGene00003850
WBGene00045056	WBGene00013739	WBGene00009501	WBGene00019705	WBGene00003473	WBGene00003859
WBGene00045255	WBGene00013794	WBGene00009502	WBGene00019710	WBGene00003474	WBGene00003877
WBGene00045302	WBGene00013796	WBGene00009513	WBGene00019723	WBGene00003476	WBGene00003879
WBGene00045382	WBGene00013797	WBGene00009515	WBGene00019729	WBGene00003478	WBGene00003887
WBGene00045495	WBGene00013799	WBGene00009517	WBGene00019735	WBGene00003479	WBGene00003890
WBGene00050910	WBGene00013816	WBGene00009520	WBGene00019770	WBGene00003485	WBGene00003906
WBGene00077490	WBGene00013847	WBGene00009526	WBGene00019814	WBGene00003499	WBGene00003931
WBGene00077756	WBGene00013856	WBGene00009528	WBGene00019816	WBGene00003504	WBGene00003932
WBGene00086555	WBGene00013884	WBGene00009548	WBGene00019854	WBGene00003508	WBGene00003941
WBGene00138720	WBGene00013926	WBGene00009549	WBGene00019863	WBGene00003522	WBGene00003943
WBGene00164985	WBGene00013969	WBGene00009550	WBGene00019908	WBGene00003530	WBGene00003956
WBGene00185101	WBGene00013972	WBGene00009581	WBGene00019922	WBGene00003546	WBGene00003957
WBGene00194699	WBGene00014000	WBGene00009592	WBGene00019973	WBGene00003555	WBGene00003958
WBGene00194707	WBGene00014030	WBGene00009605	WBGene00020028	WBGene00003561	WBGene00003959
WBGene00194906	WBGene00014040	WBGene00009621	WBGene00020112	WBGene00003568	WBGene00003964
WBGene00194923	WBGene00014067	WBGene00009641	WBGene00020113	WBGene00003582	WBGene00003968
WBGene00194983	WBGene00014089	WBGene00009646	WBGene00020131	WBGene00003588	WBGene00003969
WBGene00195183	WBGene00014143	WBGene00009680	WBGene00020135	WBGene00003595	WBGene00003978
WBGene00195185	WBGene00014144	WBGene00009681	WBGene00020170	WBGene00003601	WBGene00003986
WBGene00195186	WBGene00014149	WBGene00009682	WBGene00020207	WBGene00003622	WBGene00003995
WBGene00206376	WBGene00014159	WBGene00009683	WBGene00020264	WBGene00003652	WBGene00003999
WBGene00206390	WBGene00014199	WBGene00009684	WBGene00020295	WBGene00003656	WBGene00004000
WBGene00206459	WBGene00014206	WBGene00009685	WBGene00020306	WBGene00003661	WBGene00004001
WBGene00206492	WBGene00014668	WBGene00009706	WBGene00020314	WBGene00003662	WBGene00004002
WBGene00206507	WBGene00014698	WBGene00009708	WBGene00020334	WBGene00003664	WBGene00004006
WBGene00219315	WBGene00015013	WBGene00009710	WBGene00020363	WBGene00003665	WBGene00004007
	WBGene00015019	WBGene00009714	WBGene00020371	WBGene00003732	WBGene00004008
	WBGene00015043	WBGene00009746	WBGene00020375	WBGene00003738	WBGene00004013
	WBGene00015044	WBGene00009751	WBGene00020403	WBGene00003743	WBGene00004017
	WBGene00015045	WBGene00009753	WBGene00020450	WBGene00003777	WBGene00004020
	WBGene00015057	WBGene00009755	WBGene00020455	WBGene00003778	WBGene00004024
	WBGene00015112	WBGene00009759	WBGene00020456	WBGene00003783	WBGene00004030
	WBGene00015163	WBGene00009798	WBGene00020473	WBGene00003784	WBGene00004035
	WBGene00015187	WBGene00009807	WBGene00020537	WBGene00003785	WBGene00004058
	WBGene00015188	WBGene00009813	WBGene00020543	WBGene00003787	WBGene00004062
	WBGene00015218	WBGene00009884	WBGene00020560	WBGene00003788	WBGene00004084
	WBGene00015322	WBGene00009896	WBGene00020572	WBGene00003789	WBGene00004112
	WBGene00015332	WBGene00009914	WBGene00020612	WBGene00003790	WBGene00004119
	WBGene00015350	WBGene00009938	WBGene00020666	WBGene00003791	WBGene00004120
	WBGene00015355	WBGene00009941	WBGene00020672	WBGene00003792	WBGene00004122
	WBGene00015456	WBGene00009948	WBGene00020673	WBGene00003793	WBGene00004124
	WBGene00015464	WBGene00009956	WBGene00020677	WBGene00003794	WBGene00004127
	WBGene00015522	WBGene00009959	WBGene00020754	WBGene00003795	WBGene00004131
	WBGene00015541	WBGene00009962	WBGene00020756	WBGene00003796	WBGene00004133
	WBGene00015587	WBGene00009982	WBGene00020782	WBGene00003797	WBGene00004145
	WBGene00015595	WBGene00009995	WBGene00020817	WBGene00003798	WBGene00004154
	WBGene00015607	WBGene00010034	WBGene00020824	WBGene00003799	WBGene00004165
	WBGene00015608	WBGene00010046	WBGene00020834	WBGene00003800	WBGene00004169
	WBGene00015610	WBGene00010065	WBGene00020852	WBGene00003801	WBGene00004173
	WBGene00015613	WBGene00010070	WBGene00020933	WBGene00003802	WBGene00004177
	WBGene00015640	WBGene00010082	WBGene00021018	WBGene00003803	WBGene00004183
	WBGene00015647	WBGene00010083	WBGene00021055	WBGene00003804	WBGene00004193
	WBGene00015660	WBGene00010091	WBGene00021112	WBGene00003805	WBGene00004196
	WBGene00015679	WBGene00010114	WBGene00021174	WBGene00003818	WBGene00004197
	WBGene00015776	WBGene00010130	WBGene00021187	WBGene00003826	WBGene00004202
	WBGene00015824	WBGene00010136	WBGene00021188	WBGene00003827	WBGene00004211
	WBGene00015940	WBGene00010155	WBGene00021213	WBGene00003828	WBGene00004216
	WBGene00016052	WBGene00010166	WBGene00021240	WBGene00003830	WBGene00004218
	WBGene00016071	WBGene00010183	WBGene00021268	WBGene00003837	WBGene00004219
	WBGene00016080	WBGene00010212	WBGene00021274	WBGene00003851	WBGene00004222
	WBGene00016084	WBGene00010225	WBGene00021375	WBGene00003864	WBGene00004226
	WBGene00016088	WBGene00010226	WBGene00021391	WBGene00003865	WBGene00004231
	WBGene00016095	WBGene00010241	WBGene00021483	WBGene00003868	WBGene00004232
	WBGene00016096	WBGene00010246	WBGene00021589	WBGene00003882	WBGene00004236
	WBGene00016136	WBGene00010254	WBGene00021607	WBGene00003883	WBGene00004237
	WBGene00016147	WBGene00010256	WBGene00021651	WBGene00003891	WBGene00004264
	WBGene00016187	WBGene00010265	WBGene00021665	WBGene00003898	WBGene00004265
	WBGene00016189	WBGene00010266	WBGene00021709	WBGene00003901	WBGene00004275
	WBGene00016202	WBGene00010277	WBGene00021710	WBGene00003905	WBGene00004278
	WBGene00016274	WBGene00010289	WBGene00021835	WBGene00003911	WBGene00004285
	WBGene00016295	WBGene00010296	WBGene00021843	WBGene00003912	WBGene00004300
	WBGene00016298	WBGene00010300	WBGene00021881	WBGene00003914	WBGene00004301
	WBGene00016307	WBGene00010314	WBGene00021887	WBGene00003916	WBGene00004309
	WBGene00016309	WBGene00010317	WBGene00021966	WBGene00003917	WBGene00004315
	WBGene00016337	WBGene00010339	WBGene00021976	WBGene00003918	WBGene00004321
	WBGene00016359	WBGene00010366	WBGene00021977	WBGene00003919	WBGene00004328
	WBGene00016407	WBGene00010368	WBGene00021978	WBGene00003921	WBGene00004363
	WBGene00016422	WBGene00010373	WBGene00022052	WBGene00003930	WBGene00004364
	WBGene00016453	WBGene00010377	WBGene00022198	WBGene00003936	WBGene00004368
	WBGene00016457	WBGene00010379	WBGene00022211	WBGene00003954	WBGene00004394
	WBGene00016520	WBGene00010381	WBGene00022225	WBGene00003955	WBGene00004397
	WBGene00016545	WBGene00010425	WBGene00022237	WBGene00003961	WBGene00004398
	WBGene00016546	WBGene00010426	WBGene00022239	WBGene00003965	WBGene00004401
	WBGene00016547	WBGene00010446	WBGene00022249	WBGene00003967	WBGene00004408
	WBGene00016549	WBGene00010466	WBGene00022262	WBGene00003970	WBGene00004414
	WBGene00016550	WBGene00010473	WBGene00022277	WBGene00003976	WBGene00004418
	WBGene00016553	WBGene00010474	WBGene00022322	WBGene00003977	WBGene00004421
	WBGene00016578	WBGene00010485	WBGene00022334	WBGene00003979	WBGene00004423
	WBGene00016594	WBGene00010486	WBGene00022352	WBGene00003983	WBGene00004426
	WBGene00016603	WBGene00010508	WBGene00022393	WBGene00003987	WBGene00004437
	WBGene00016657	WBGene00010510	WBGene00022413	WBGene00003989	WBGene00004438
	WBGene00016697	WBGene00010516	WBGene00022416	WBGene00003990	WBGene00004441
	WBGene00016735	WBGene00010520	WBGene00022438	WBGene00003992	WBGene00004444
	WBGene00016783	WBGene00010531	WBGene00022441	WBGene00003994	WBGene00004449
	WBGene00016788	WBGene00010547	WBGene00022446	WBGene00003998	WBGene00004452
	WBGene00016836	WBGene00010563	WBGene00022484	WBGene00004016	WBGene00004455
	WBGene00016841	WBGene00010574	WBGene00022485	WBGene00004025	WBGene00004470
	WBGene00016845	WBGene00010575	WBGene00022486	WBGene00004027	WBGene00004471
	WBGene00016866	WBGene00010579	WBGene00022523	WBGene00004028	WBGene00004473
	WBGene00016868	WBGene00010611	WBGene00022532	WBGene00004029	WBGene00004475
	WBGene00016880	WBGene00010612	WBGene00022558	WBGene00004031	WBGene00004477
	WBGene00016886	WBGene00010633	WBGene00022559	WBGene00004034	WBGene00004478
	WBGene00016894	WBGene00010650	WBGene00022560	WBGene00004042	WBGene00004486
	WBGene00017012	WBGene00010651	WBGene00022569	WBGene00004043	WBGene00004489
	WBGene00017028	WBGene00010657	WBGene00022583	WBGene00004044	WBGene00004507
	WBGene00017046	WBGene00010660	WBGene00022601	WBGene00004047	WBGene00004771
	WBGene00017083	WBGene00010679	WBGene00022677	WBGene00004049	WBGene00004773
	WBGene00017116	WBGene00010681	WBGene00022689	WBGene00004050	WBGene00004779
	WBGene00017133	WBGene00010693	WBGene00022697	WBGene00004063	WBGene00004789
	WBGene00017135	WBGene00010701	WBGene00022717	WBGene00004075	WBGene00004790
	WBGene00017140	WBGene00010712	WBGene00022729	WBGene00004077	WBGene00004796
	WBGene00017142	WBGene00010719	WBGene00022730	WBGene00004078	WBGene00004801
	WBGene00017143	WBGene00010728	WBGene00022731	WBGene00004086	WBGene00004809
	WBGene00017201	WBGene00010745	WBGene00022785	WBGene00004089	WBGene00004810
	WBGene00017208	WBGene00010749	WBGene00022786	WBGene00004093	WBGene00004811
	WBGene00017211	WBGene00010760	WBGene00022788	WBGene00004094	WBGene00004856
	WBGene00017249	WBGene00010763	WBGene00022793	WBGene00004095	WBGene00004859
	WBGene00017251	WBGene00010829	WBGene00043156	WBGene00004105	WBGene00004898
	WBGene00017252	WBGene00010833	WBGene00043995	WBGene00004106	WBGene00004901
	WBGene00017253	WBGene00010834	WBGene00044032	WBGene00004109	WBGene00004904
	WBGene00017254	WBGene00010859	WBGene00044034	WBGene00004110	WBGene00004907
	WBGene00017274	WBGene00010865	WBGene00044045	WBGene00004116	WBGene00004909
	WBGene00017296	WBGene00010869	WBGene00044137	WBGene00004125	WBGene00004910
	WBGene00017298	WBGene00010874	WBGene00044149	WBGene00004132	WBGene00004921
	WBGene00017303	WBGene00010876	WBGene00044154	WBGene00004134	WBGene00004923
	WBGene00017343	WBGene00010883	WBGene00044167	WBGene00004136	WBGene00004924
	WBGene00017390	WBGene00010885	WBGene00044197	WBGene00004140	WBGene00004925
	WBGene00017405	WBGene00010886	WBGene00044200	WBGene00004143	WBGene00004926
	WBGene00017406	WBGene00010896	WBGene00044253	WBGene00004147	WBGene00004950
	WBGene00017408	WBGene00010900	WBGene00044281	WBGene00004148	WBGene00004958
	WBGene00017423	WBGene00010920	WBGene00044319	WBGene00004155	WBGene00004960
	WBGene00017467	WBGene00010925	WBGene00044371	WBGene00004157	WBGene00004962
	WBGene00017481	WBGene00010933	WBGene00044372	WBGene00004163	WBGene00004963
	WBGene00017484	WBGene00010960	WBGene00044439	WBGene00004164	WBGene00004964
	WBGene00017485	WBGene00010963	WBGene00044440	WBGene00004166	WBGene00004965
	WBGene00017490	WBGene00010965	WBGene00044443	WBGene00004167	WBGene00004966
	WBGene00017498	WBGene00010967	WBGene00044460	WBGene00004168	WBGene00004969
	WBGene00017499	WBGene00010969	WBGene00044461	WBGene00004178	WBGene00004971
	WBGene00017500	WBGene00010980	WBGene00044478	WBGene00004179	WBGene00004972
	WBGene00017501	WBGene00010988	WBGene00044503	WBGene00004180	WBGene00004973
	WBGene00017535	WBGene00011006	WBGene00044560	WBGene00004181	WBGene00004974
	WBGene00017546	WBGene00011059	WBGene00044614	WBGene00004187	WBGene00004976
	WBGene00017562	WBGene00011070	WBGene00044675	WBGene00004188	WBGene00004998
	WBGene00017563	WBGene00011072	WBGene00044692	WBGene00004203	WBGene00005011
	WBGene00017601	WBGene00011082	WBGene00044693	WBGene00004204	WBGene00005012
	WBGene00017677	WBGene00011114	WBGene00044742	WBGene00004206	WBGene00005013
	WBGene00017699	WBGene00011120	WBGene00044784	WBGene00004207	WBGene00005016
	WBGene00017713	WBGene00011128	WBGene00045056	WBGene00004208	WBGene00005017
	WBGene00017729	WBGene00011132	WBGene00045255	WBGene00004209	WBGene00005018
	WBGene00017752	WBGene00011133	WBGene00045289	WBGene00004215	WBGene00005153
	WBGene00017755	WBGene00011134	WBGene00045292	WBGene00004217	WBGene00005188
	WBGene00017756	WBGene00011171	WBGene00045302	WBGene00004220	WBGene00005189
	WBGene00017781	WBGene00011172	WBGene00045382	WBGene00004227	WBGene00005191
	WBGene00017796	WBGene00011173	WBGene00045495	WBGene00004239	WBGene00005222
	WBGene00017806	WBGene00011176	WBGene00050910	WBGene00004241	WBGene00005523
	WBGene00017811	WBGene00011184	WBGene00077490	WBGene00004242	WBGene00005548
	WBGene00017812	WBGene00011191	WBGene00077756	WBGene00004243	WBGene00005602
	WBGene00017834	WBGene00011203	WBGene00077761	WBGene00004244	WBGene00005653
	WBGene00017840	WBGene00011214	WBGene00077787	WBGene00004254	WBGene00005655
	WBGene00017908	WBGene00011244	WBGene00164974	WBGene00004259	WBGene00005657
	WBGene00017911	WBGene00011269	WBGene00164985	WBGene00004270	WBGene00005703
	WBGene00017951	WBGene00011284	WBGene00185101	WBGene00004272	WBGene00005712
	WBGene00017990	WBGene00011289	WBGene00194661	WBGene00004276	WBGene00005780
	WBGene00018021	WBGene00011295	WBGene00194699	WBGene00004297	WBGene00005832
	WBGene00018041	WBGene00011321	WBGene00194923	WBGene00004302	WBGene00005833
	WBGene00018103	WBGene00011322	WBGene00194981	WBGene00004304	WBGene00005899
	WBGene00018104	WBGene00011336	WBGene00194982	WBGene00004305	WBGene00005929
	WBGene00018106	WBGene00011339	WBGene00194983	WBGene00004307	WBGene00006038
	WBGene00018118	WBGene00011340	WBGene00195183	WBGene00004308	WBGene00006039
	WBGene00018195	WBGene00011378	WBGene00195185	WBGene00004312	WBGene00006040
	WBGene00018204	WBGene00011379	WBGene00195186	WBGene00004313	WBGene00006044
	WBGene00018215	WBGene00011401	WBGene00195239	WBGene00004314	WBGene00006047
	WBGene00018236	WBGene00011425	WBGene00195244	WBGene00004326	WBGene00006048
	WBGene00018242	WBGene00011438	WBGene00206492	WBGene00004333	WBGene00006049
	WBGene00018245	WBGene00011460	WBGene00206507	WBGene00004335	WBGene00006050
	WBGene00018248	WBGene00011462	WBGene00219302	WBGene00004337	WBGene00006051
	WBGene00018267	WBGene00011466	WBGene00219315	WBGene00004338	WBGene00006052
	WBGene00018268	WBGene00011467		WBGene00004339	WBGene00006053
	WBGene00018269	WBGene00011473		WBGene00004343	WBGene00006056
	WBGene00018278	WBGene00011478		WBGene00004351	WBGene00006057
	WBGene00018286	WBGene00011487		WBGene00004352	WBGene00006058
	WBGene00018353	WBGene00011491		WBGene00004353	WBGene00006060
	WBGene00018354	WBGene00011493		WBGene00004354	WBGene00006062
	WBGene00018355	WBGene00011539		WBGene00004355	WBGene00006064
	WBGene00018384	WBGene00011554		WBGene00004367	WBGene00006067
	WBGene00018416	WBGene00011616		WBGene00004371	WBGene00006075
	WBGene00018436	WBGene00011668		WBGene00004373	WBGene00006193
	WBGene00018437	WBGene00011670		WBGene00004374	WBGene00006212
	WBGene00018438	WBGene00011679		WBGene00004375	WBGene00006224
	WBGene00018442	WBGene00011683		WBGene00004377	WBGene00006309
	WBGene00018444	WBGene00011749		WBGene00004380	WBGene00006310
	WBGene00018452	WBGene00011753		WBGene00004384	WBGene00006319
	WBGene00018456	WBGene00011795		WBGene00004386	WBGene00006321
	WBGene00018458	WBGene00011844		WBGene00004388	WBGene00006353
	WBGene00018459	WBGene00011910		WBGene00004389	WBGene00006363
	WBGene00018460	WBGene00011911		WBGene00004391	WBGene00006366
	WBGene00018461	WBGene00011918		WBGene00004392	WBGene00006408
	WBGene00018465	WBGene00011919		WBGene00004403	WBGene00006409
	WBGene00018489	WBGene00011926		WBGene00004458	WBGene00006416
	WBGene00018511	WBGene00011936		WBGene00004459	WBGene00006438
	WBGene00018520	WBGene00011938		WBGene00004460	WBGene00006449
	WBGene00018546	WBGene00011951		WBGene00004461	WBGene00006464
	WBGene00018566	WBGene00011954		WBGene00004462	WBGene00006467
	WBGene00018568	WBGene00011968		WBGene00004463	WBGene00006473
	WBGene00018606	WBGene00012012		WBGene00004465	WBGene00006486
	WBGene00018607	WBGene00012034		WBGene00004466	WBGene00006495
	WBGene00018630	WBGene00012087		WBGene00004467	WBGene00006509
	WBGene00018643	WBGene00012091		WBGene00004468	WBGene00006510
	WBGene00018681	WBGene00012134		WBGene00004501	WBGene00006522
	WBGene00018707	WBGene00012169		WBGene00004502	WBGene00006531
	WBGene00018740	WBGene00012173		WBGene00004503	WBGene00006533
	WBGene00018743	WBGene00012177		WBGene00004505	WBGene00006535
	WBGene00018746	WBGene00012180		WBGene00004506	WBGene00006553
	WBGene00018763	WBGene00012207		WBGene00004510	WBGene00006572
	WBGene00018766	WBGene00012223		WBGene00004681	WBGene00006578
	WBGene00018771	WBGene00012250		WBGene00004684	WBGene00006580
	WBGene00018778	WBGene00012251		WBGene00004698	WBGene00006582
	WBGene00018828	WBGene00012280		WBGene00004700	WBGene00006583
	WBGene00018900	WBGene00012285		WBGene00004701	WBGene00006584
	WBGene00018913	WBGene00012294		WBGene00004702	WBGene00006588
	WBGene00018990	WBGene00012296		WBGene00004704	WBGene00006589
	WBGene00019002	WBGene00012308		WBGene00004705	WBGene00006591
	WBGene00019034	WBGene00012323		WBGene00004706	WBGene00006609
	WBGene00019035	WBGene00012357		WBGene00004723	WBGene00006611
	WBGene00019037	WBGene00012379		WBGene00004728	WBGene00006614
	WBGene00019039	WBGene00012402		WBGene00004729	WBGene00006618
	WBGene00019040	WBGene00012407		WBGene00004732	WBGene00006623
	WBGene00019041	WBGene00012421		WBGene00004737	WBGene00006625
	WBGene00019042	WBGene00012482		WBGene00004738	WBGene00006627
	WBGene00019043	WBGene00012500		WBGene00004743	WBGene00006628
	WBGene00019045	WBGene00012502		WBGene00004745	WBGene00006629
	WBGene00019082	WBGene00012547		WBGene00004747	WBGene00006636
	WBGene00019087	WBGene00012549		WBGene00004750	WBGene00006637
	WBGene00019154	WBGene00012591		WBGene00004751	WBGene00006640
	WBGene00019208	WBGene00012595		WBGene00004756	WBGene00006644
	WBGene00019239	WBGene00012604		WBGene00004762	WBGene00006645
	WBGene00019243	WBGene00012631		WBGene00004765	WBGene00006656
	WBGene00019263	WBGene00012633		WBGene00004767	WBGene00006661
	WBGene00019268	WBGene00012634		WBGene00004768	WBGene00006663
	WBGene00019311	WBGene00012638		WBGene00004769	WBGene00006664
	WBGene00019312	WBGene00012642		WBGene00004775	WBGene00006668
	WBGene00019313	WBGene00012683		WBGene00004782	WBGene00006671
	WBGene00019368	WBGene00012711		WBGene00004786	WBGene00006672
	WBGene00019412	WBGene00012721		WBGene00004795	WBGene00006677
	WBGene00019413	WBGene00012728		WBGene00004798	WBGene00006679
	WBGene00019414	WBGene00012741		WBGene00004804	WBGene00006681
	WBGene00019415	WBGene00012757		WBGene00004806	WBGene00006683
	WBGene00019416	WBGene00012760		WBGene00004808	WBGene00006686
	WBGene00019417	WBGene00012761		WBGene00004813	WBGene00006689
	WBGene00019418	WBGene00012781		WBGene00004814	WBGene00006693
	WBGene00019420	WBGene00012784		WBGene00004815	WBGene00006719
	WBGene00019426	WBGene00012786		WBGene00004816	WBGene00006741
	WBGene00019470	WBGene00012809		WBGene00004818	WBGene00006749
	WBGene00019471	WBGene00012822		WBGene00004819	WBGene00006752
	WBGene00019473	WBGene00012827		WBGene00004820	WBGene00006765
	WBGene00019479	WBGene00012830		WBGene00004821	WBGene00006772
	WBGene00019514	WBGene00012831		WBGene00004823	WBGene00006798
	WBGene00019547	WBGene00012834		WBGene00004827	WBGene00006814
	WBGene00019564	WBGene00012855		WBGene00004829	WBGene00006815
	WBGene00019591	WBGene00012871		WBGene00004873	WBGene00006818
	WBGene00019592	WBGene00012901		WBGene00004874	WBGene00006824
	WBGene00019611	WBGene00012909		WBGene00004884	WBGene00006826
	WBGene00019634	WBGene00012911		WBGene00004886	WBGene00006827
	WBGene00019662	WBGene00012912		WBGene00004888	WBGene00006830
	WBGene00019687	WBGene00012919		WBGene00004892	WBGene00006832
	WBGene00019690	WBGene00012925		WBGene00004893	WBGene00006836
	WBGene00019698	WBGene00012926		WBGene00004895	WBGene00006844
	WBGene00019700	WBGene00012937		WBGene00004896	WBGene00006863
	WBGene00019703	WBGene00012965		WBGene00004897	WBGene00006873
	WBGene00019704	WBGene00012979		WBGene00004905	WBGene00006874
	WBGene00019705	WBGene00013025		WBGene00004908	WBGene00006895
	WBGene00019748	WBGene00013033		WBGene00004915	WBGene00006915
	WBGene00019791	WBGene00013052		WBGene00004927	WBGene00006935
	WBGene00019797	WBGene00013076		WBGene00004930	WBGene00006942
	WBGene00019814	WBGene00013085		WBGene00004932	WBGene00006948
	WBGene00019815	WBGene00013087		WBGene00004945	WBGene00006950
	WBGene00019817	WBGene00013090		WBGene00004946	WBGene00006952
	WBGene00019855	WBGene00013104		WBGene00004947	WBGene00006954
	WBGene00019862	WBGene00013119		WBGene00004949	WBGene00006955
	WBGene00019871	WBGene00013120		WBGene00004952	WBGene00006971
	WBGene00019921	WBGene00013125		WBGene00004953	WBGene00006978
	WBGene00019922	WBGene00013138		WBGene00004980	WBGene00006982
	WBGene00019923	WBGene00013142		WBGene00004984	WBGene00006983
	WBGene00019925	WBGene00013165		WBGene00004987	WBGene00006987
	WBGene00019927	WBGene00013169		WBGene00005003	WBGene00007044
	WBGene00019938	WBGene00013186		WBGene00005007	WBGene00007049
	WBGene00019940	WBGene00013192		WBGene00005008	WBGene00007060
	WBGene00019952	WBGene00013194		WBGene00005009	WBGene00007070
	WBGene00019956	WBGene00013207		WBGene00005010	WBGene00007080
	WBGene00019961	WBGene00013238		WBGene00005014	WBGene00007081
	WBGene00019968	WBGene00013279		WBGene00005020	WBGene00007082
	WBGene00020010	WBGene00013290		WBGene00005023	WBGene00007096
	WBGene00020073	WBGene00013299		WBGene00005024	WBGene00007097
	WBGene00020080	WBGene00013303		WBGene00005025	WBGene00007112
	WBGene00020148	WBGene00013304		WBGene00005040	WBGene00007117
	WBGene00020160	WBGene00013311		WBGene00005058	WBGene00007119
	WBGene00020182	WBGene00013437		WBGene00005077	WBGene00007130
	WBGene00020204	WBGene00013449		WBGene00005078	WBGene00007141
	WBGene00020205	WBGene00013473		WBGene00005104	WBGene00007142
	WBGene00020208	WBGene00013474		WBGene00005241	WBGene00007149
	WBGene00020222	WBGene00013521		WBGene00005349	WBGene00007155
	WBGene00020250	WBGene00013523		WBGene00005408	WBGene00007156
	WBGene00020258	WBGene00013526		WBGene00005552	WBGene00007159
	WBGene00020261	WBGene00013568		WBGene00005642	WBGene00007169
	WBGene00020276	WBGene00013575		WBGene00005643	WBGene00007170
	WBGene00020343	WBGene00013600		WBGene00005644	WBGene00007177
	WBGene00020354	WBGene00013608		WBGene00005718	WBGene00007178
	WBGene00020362	WBGene00013622		WBGene00006063	WBGene00007185
	WBGene00020379	WBGene00013636		WBGene00006311	WBGene00007190
	WBGene00020421	WBGene00013637		WBGene00006324	WBGene00007191
	WBGene00020438	WBGene00013656		WBGene00006331	WBGene00007194
	WBGene00020473	WBGene00013657		WBGene00006349	WBGene00007197
	WBGene00020508	WBGene00013671		WBGene00006351	WBGene00007198
	WBGene00020509	WBGene00013684		WBGene00006364	WBGene00007203
	WBGene00020522	WBGene00013690		WBGene00006367	WBGene00007209
	WBGene00020537	WBGene00013693		WBGene00006368	WBGene00007210
	WBGene00020541	WBGene00013696		WBGene00006374	WBGene00007219
	WBGene00020542	WBGene00013700		WBGene00006379	WBGene00007222
	WBGene00020543	WBGene00013710		WBGene00006381	WBGene00007224
	WBGene00020544	WBGene00013713		WBGene00006383	WBGene00007229
	WBGene00020613	WBGene00013716		WBGene00006384	WBGene00007230
	WBGene00020649	WBGene00013723		WBGene00006387	WBGene00007232
	WBGene00020665	WBGene00013771		WBGene00006388	WBGene00007239
	WBGene00020672	WBGene00013781		WBGene00006389	WBGene00007244
	WBGene00020674	WBGene00013785		WBGene00006391	WBGene00007248
	WBGene00020700	WBGene00013800		WBGene00006393	WBGene00007249
	WBGene00020706	WBGene00013801		WBGene00006394	WBGene00007250
	WBGene00020721	WBGene00013811		WBGene00006396	WBGene00007251
	WBGene00020741	WBGene00013853		WBGene00006405	WBGene00007262
	WBGene00020758	WBGene00013854		WBGene00006406	WBGene00007264
	WBGene00020776	WBGene00013858		WBGene00006414	WBGene00007268
	WBGene00020825	WBGene00013879		WBGene00006431	WBGene00007269
	WBGene00020834	WBGene00013886		WBGene00006437	WBGene00007274
	WBGene00020835	WBGene00013887		WBGene00006443	WBGene00007275
	WBGene00020891	WBGene00013888		WBGene00006446	WBGene00007296
	WBGene00020909	WBGene00013889		WBGene00006447	WBGene00007300
	WBGene00020911	WBGene00013895		WBGene00006463	WBGene00007301
	WBGene00020940	WBGene00013901		WBGene00006466	WBGene00007305
	WBGene00020992	WBGene00013927		WBGene00006474	WBGene00007306
	WBGene00021002	WBGene00013928		WBGene00006476	WBGene00007307
	WBGene00021032	WBGene00013930		WBGene00006477	WBGene00007308
	WBGene00021050	WBGene00013933		WBGene00006481	WBGene00007316
	WBGene00021053	WBGene00013956		WBGene00006483	WBGene00007320
	WBGene00021092	WBGene00013979		WBGene00006493	WBGene00007323
	WBGene00021165	WBGene00013987		WBGene00006498	WBGene00007335
	WBGene00021167	WBGene00013988		WBGene00006499	WBGene00007336
	WBGene00021180	WBGene00013999		WBGene00006504	WBGene00007337
	WBGene00021186	WBGene00014003		WBGene00006516	WBGene00007343
	WBGene00021199	WBGene00014007		WBGene00006523	WBGene00007344
	WBGene00021204	WBGene00014029		WBGene00006528	WBGene00007353
	WBGene00021236	WBGene00014082		WBGene00006529	WBGene00007354
	WBGene00021263	WBGene00014104		WBGene00006536	WBGene00007368
	WBGene00021293	WBGene00014116		WBGene00006537	WBGene00007381
	WBGene00021299	WBGene00014121		WBGene00006539	WBGene00007382
	WBGene00021365	WBGene00014132		WBGene00006541	WBGene00007384
	WBGene00021389	WBGene00014136		WBGene00006542	WBGene00007388
	WBGene00021458	WBGene00014137		WBGene00006545	WBGene00007392
	WBGene00021463	WBGene00014154		WBGene00006546	WBGene00007393
	WBGene00021464	WBGene00014157		WBGene00006547	WBGene00007394
	WBGene00021468	WBGene00014158		WBGene00006549	WBGene00007397
	WBGene00021469	WBGene00014168		WBGene00006552	WBGene00007398
	WBGene00021491	WBGene00014169		WBGene00006555	WBGene00007404
	WBGene00021505	WBGene00014174		WBGene00006556	WBGene00007405
	WBGene00021519	WBGene00014179		WBGene00006557	WBGene00007408
	WBGene00021533	WBGene00014197		WBGene00006558	WBGene00007414
	WBGene00021542	WBGene00014223		WBGene00006559	WBGene00007415
	WBGene00021557	WBGene00014240		WBGene00006562	WBGene00007420
	WBGene00021559	WBGene00014246		WBGene00006563	WBGene00007422
	WBGene00021567	WBGene00014247		WBGene00006568	WBGene00007423
	WBGene00021576	WBGene00014997		WBGene00006571	WBGene00007424
	WBGene00021580	WBGene00015002		WBGene00006577	WBGene00007427
	WBGene00021605	WBGene00015024		WBGene00006579	WBGene00007446
	WBGene00021717	WBGene00015034		WBGene00006590	WBGene00007448
	WBGene00021719	WBGene00015050		WBGene00006592	WBGene00007457
	WBGene00021731	WBGene00015051		WBGene00006593	WBGene00007460
	WBGene00021773	WBGene00015084		WBGene00006596	WBGene00007462
	WBGene00021774	WBGene00015089		WBGene00006602	WBGene00007474
	WBGene00021779	WBGene00015094		WBGene00006603	WBGene00007478
	WBGene00021810	WBGene00015097		WBGene00006605	WBGene00007495
	WBGene00021861	WBGene00015106		WBGene00006606	WBGene00007503
	WBGene00021862	WBGene00015152		WBGene00006619	WBGene00007507
	WBGene00021863	WBGene00015182		WBGene00006626	WBGene00007508
	WBGene00021886	WBGene00015185		WBGene00006638	WBGene00007509
	WBGene00021898	WBGene00015190		WBGene00006647	WBGene00007512
	WBGene00021913	WBGene00015193		WBGene00006648	WBGene00007525
	WBGene00021919	WBGene00015198		WBGene00006670	WBGene00007537
	WBGene00021977	WBGene00015210		WBGene00006695	WBGene00007538
	WBGene00022024	WBGene00015223		WBGene00006697	WBGene00007541
	WBGene00022076	WBGene00015224		WBGene00006699	WBGene00007543
	WBGene00022112	WBGene00015225		WBGene00006700	WBGene00007544
	WBGene00022135	WBGene00015227		WBGene00006702	WBGene00007546
	WBGene00022149	WBGene00015230		WBGene00006706	WBGene00007549
	WBGene00022231	WBGene00015258		WBGene00006710	WBGene00007555
	WBGene00022262	WBGene00015259		WBGene00006720	WBGene00007557
	WBGene00022265	WBGene00015260		WBGene00006727	WBGene00007559
	WBGene00022334	WBGene00015281		WBGene00006729	WBGene00007560
	WBGene00022349	WBGene00015306		WBGene00006733	WBGene00007562
	WBGene00022360	WBGene00015326		WBGene00006737	WBGene00007563
	WBGene00022369	WBGene00015331		WBGene00006763	WBGene00007565
	WBGene00022418	WBGene00015339		WBGene00006768	WBGene00007570
	WBGene00022555	WBGene00015340		WBGene00006769	WBGene00007584
	WBGene00022557	WBGene00015345		WBGene00006770	WBGene00007590
	WBGene00022558	WBGene00015348		WBGene00006773	WBGene00007592
	WBGene00022559	WBGene00015386		WBGene00006775	WBGene00007597
	WBGene00022561	WBGene00015389		WBGene00006776	WBGene00007600
	WBGene00022591	WBGene00015403		WBGene00006785	WBGene00007601
	WBGene00022612	WBGene00015422		WBGene00006791	WBGene00007604
	WBGene00022643	WBGene00015442		WBGene00006793	WBGene00007607
	WBGene00022718	WBGene00015467		WBGene00006795	WBGene00007608
	WBGene00022741	WBGene00015472		WBGene00006802	WBGene00007610
	WBGene00022770	WBGene00015512		WBGene00006804	WBGene00007611
	WBGene00022797	WBGene00015516		WBGene00006808	WBGene00007613
	WBGene00022816	WBGene00015558		WBGene00006810	WBGene00007617
	WBGene00023423	WBGene00015572		WBGene00006816	WBGene00007628
	WBGene00023491	WBGene00015573		WBGene00006817	WBGene00007631
	WBGene00023497	WBGene00015593		WBGene00006829	WBGene00007632
	WBGene00044008	WBGene00015605		WBGene00006840	WBGene00007633
	WBGene00044024	WBGene00015623		WBGene00006843	WBGene00007639
	WBGene00044066	WBGene00015627		WBGene00006845	WBGene00007641
	WBGene00044197	WBGene00015629		WBGene00006856	WBGene00007648
	WBGene00044200	WBGene00015634		WBGene00006864	WBGene00007650
	WBGene00044212	WBGene00015655		WBGene00006868	WBGene00007653
	WBGene00044242	WBGene00015661		WBGene00006869	WBGene00007660
	WBGene00044281	WBGene00015676		WBGene00006876	WBGene00007685
	WBGene00044303	WBGene00015688		WBGene00006888	WBGene00007688
	WBGene00044314	WBGene00015689		WBGene00006896	WBGene00007695
	WBGene00044371	WBGene00015696		WBGene00006902	WBGene00007699
	WBGene00044372	WBGene00015713		WBGene00006914	WBGene00007700
	WBGene00044379	WBGene00015759		WBGene00006916	WBGene00007708
	WBGene00044417	WBGene00015765		WBGene00006925	WBGene00007714
	WBGene00044479	WBGene00015780		WBGene00006926	WBGene00007716
	WBGene00044492	WBGene00015803		WBGene00006927	WBGene00007717
	WBGene00044502	WBGene00015820		WBGene00006928	WBGene00007721
	WBGene00044564	WBGene00015823		WBGene00006929	WBGene00007722
	WBGene00044567	WBGene00015828		WBGene00006930	WBGene00007724
	WBGene00044689	WBGene00015829		WBGene00006938	WBGene00007725
	WBGene00044692	WBGene00015839		WBGene00006940	WBGene00007726
	WBGene00044694	WBGene00015855		WBGene00006941	WBGene00007727
	WBGene00044698	WBGene00015865		WBGene00006943	WBGene00007733
	WBGene00044725	WBGene00015907		WBGene00006957	WBGene00007735
	WBGene00044733	WBGene00015908		WBGene00006958	WBGene00007740
	WBGene00044767	WBGene00015913		WBGene00006962	WBGene00007743
	WBGene00044772	WBGene00015917		WBGene00006963	WBGene00007748
	WBGene00044796	WBGene00015929		WBGene00006964	WBGene00007751
	WBGene00044798	WBGene00015931		WBGene00006974	WBGene00007753
	WBGene00044998	WBGene00015932		WBGene00006977	WBGene00007763
	WBGene00045058	WBGene00015937		WBGene00006980	WBGene00007764
	WBGene00045299	WBGene00015944		WBGene00006988	WBGene00007775
	WBGene00045300	WBGene00015949		WBGene00006993	WBGene00007777
	WBGene00045301	WBGene00015954		WBGene00006994	WBGene00007778
	WBGene00045379	WBGene00015956		WBGene00006996	WBGene00007791
	WBGene00045417	WBGene00015987		WBGene00006997	WBGene00007792
	WBGene00045486	WBGene00015994		WBGene00007017	WBGene00007793
	WBGene00045498	WBGene00015997		WBGene00007024	WBGene00007794
	WBGene00077490	WBGene00016030		WBGene00007027	WBGene00007795
	WBGene00077508	WBGene00016040		WBGene00007028	WBGene00007801
	WBGene00077663	WBGene00016053		WBGene00007030	WBGene00007804
	WBGene00086555	WBGene00016054		WBGene00007042	WBGene00007806
	WBGene00189954	WBGene00016058		WBGene00007047	WBGene00007811
	WBGene00195155	WBGene00016125		WBGene00007048	WBGene00007812
	WBGene00206414	WBGene00016146		WBGene00007053	WBGene00007817
	WBGene00206417	WBGene00016161		WBGene00007062	WBGene00007823
	WBGene00206500	WBGene00016164		WBGene00007089	WBGene00007824
	WBGene00206519	WBGene00016179		WBGene00007090	WBGene00007841
	WBGene00219208	WBGene00016180		WBGene00007092	WBGene00007849
	WBGene00219210	WBGene00016181		WBGene00007102	WBGene00007857
	WBGene00219217	WBGene00016204		WBGene00007103	WBGene00007862
		WBGene00016258		WBGene00007109	WBGene00007863
		WBGene00016286		WBGene00007115	WBGene00007866
		WBGene00016288		WBGene00007118	WBGene00007883
		WBGene00016294		WBGene00007122	WBGene00007888
		WBGene00016312		WBGene00007135	WBGene00007890
		WBGene00016322		WBGene00007145	WBGene00007891
		WBGene00016327		WBGene00007150	WBGene00007892
		WBGene00016336		WBGene00007153	WBGene00007898
		WBGene00016340		WBGene00007168	WBGene00007903
		WBGene00016351		WBGene00007171	WBGene00007904
		WBGene00016357		WBGene00007175	WBGene00007905
		WBGene00016358		WBGene00007182	WBGene00007916
		WBGene00016388		WBGene00007184	WBGene00007919
		WBGene00016398		WBGene00007186	WBGene00007926
		WBGene00016399		WBGene00007188	WBGene00007931
		WBGene00016403		WBGene00007196	WBGene00007934
		WBGene00016414		WBGene00007202	WBGene00007938
		WBGene00016416		WBGene00007211	WBGene00007945
		WBGene00016420		WBGene00007214	WBGene00007948
		WBGene00016431		WBGene00007218	WBGene00007950
		WBGene00016433		WBGene00007221	WBGene00007954
		WBGene00016436		WBGene00007225	WBGene00007957
		WBGene00016440		WBGene00007227	WBGene00007958
		WBGene00016447		WBGene00007256	WBGene00007973
		WBGene00016451		WBGene00007271	WBGene00007977
		WBGene00016462		WBGene00007277	WBGene00007980
		WBGene00016491		WBGene00007282	WBGene00007981
		WBGene00016502		WBGene00007283	WBGene00007984
		WBGene00016512		WBGene00007285	WBGene00007986
		WBGene00016523		WBGene00007286	WBGene00007987
		WBGene00016541		WBGene00007290	WBGene00007989
		WBGene00016577		WBGene00007297	WBGene00007996
		WBGene00016595		WBGene00007299	WBGene00007998
		WBGene00016596		WBGene00007303	WBGene00007999
		WBGene00016605		WBGene00007309	WBGene00008001
		WBGene00016607		WBGene00007313	WBGene00008010
		WBGene00016612		WBGene00007315	WBGene00008029
		WBGene00016614		WBGene00007324	WBGene00008030
		WBGene00016644		WBGene00007327	WBGene00008032
		WBGene00016658		WBGene00007329	WBGene00008033
		WBGene00016659		WBGene00007332	WBGene00008038
		WBGene00016664		WBGene00007333	WBGene00008039
		WBGene00016675		WBGene00007342	WBGene00008043
		WBGene00016679		WBGene00007348	WBGene00008044
		WBGene00016680		WBGene00007351	WBGene00008063
		WBGene00016683		WBGene00007352	WBGene00008074
		WBGene00016707		WBGene00007362	WBGene00008075
		WBGene00016742		WBGene00007363	WBGene00008076
		WBGene00016752		WBGene00007366	WBGene00008079
		WBGene00016753		WBGene00007372	WBGene00008089
		WBGene00016757		WBGene00007375	WBGene00008091
		WBGene00016759		WBGene00007391	WBGene00008099
		WBGene00016809		WBGene00007400	WBGene00008106
		WBGene00016825		WBGene00007403	WBGene00008123
		WBGene00016826		WBGene00007417	WBGene00008124
		WBGene00016839		WBGene00007419	WBGene00008125
		WBGene00016843		WBGene00007428	WBGene00008127
		WBGene00016872		WBGene00007433	WBGene00008137
		WBGene00016874		WBGene00007440	WBGene00008141
		WBGene00016891		WBGene00007445	WBGene00008150
		WBGene00016898		WBGene00007452	WBGene00008151
		WBGene00016942		WBGene00007458	WBGene00008152
		WBGene00016953		WBGene00007459	WBGene00008153
		WBGene00016954		WBGene00007464	WBGene00008154
		WBGene00017026		WBGene00007497	WBGene00008155
		WBGene00017032		WBGene00007499	WBGene00008175
		WBGene00017055		WBGene00007500	WBGene00008176
		WBGene00017056		WBGene00007501	WBGene00008185
		WBGene00017058		WBGene00007505	WBGene00008186
		WBGene00017059		WBGene00007513	WBGene00008191
		WBGene00017068		WBGene00007532	WBGene00008199
		WBGene00017112		WBGene00007533	WBGene00008200
		WBGene00017114		WBGene00007534	WBGene00008201
		WBGene00017163		WBGene00007554	WBGene00008202
		WBGene00017175		WBGene00007556	WBGene00008205
		WBGene00017179		WBGene00007561	WBGene00008211
		WBGene00017183		WBGene00007578	WBGene00008213
		WBGene00017199		WBGene00007583	WBGene00008215
		WBGene00017200		WBGene00007588	WBGene00008220
		WBGene00017218		WBGene00007598	WBGene00008226
		WBGene00017219		WBGene00007602	WBGene00008227
		WBGene00017227		WBGene00007603	WBGene00008228
		WBGene00017246		WBGene00007622	WBGene00008229
		WBGene00017247		WBGene00007624	WBGene00008230
		WBGene00017279		WBGene00007637	WBGene00008231
		WBGene00017312		WBGene00007640	WBGene00008233
		WBGene00017320		WBGene00007642	WBGene00008234
		WBGene00017325		WBGene00007643	WBGene00008235
		WBGene00017334		WBGene00007645	WBGene00008243
		WBGene00017335		WBGene00007658	WBGene00008244
		WBGene00017364		WBGene00007687	WBGene00008245
		WBGene00017384		WBGene00007691	WBGene00008246
		WBGene00017386		WBGene00007696	WBGene00008247
		WBGene00017387		WBGene00007697	WBGene00008254
		WBGene00017413		WBGene00007705	WBGene00008255
		WBGene00017417		WBGene00007706	WBGene00008258
		WBGene00017418		WBGene00007709	WBGene00008259
		WBGene00017426		WBGene00007710	WBGene00008260
		WBGene00017448		WBGene00007711	WBGene00008272
		WBGene00017471		WBGene00007736	WBGene00008273
		WBGene00017473		WBGene00007752	WBGene00008277
		WBGene00017542		WBGene00007757	WBGene00008287
		WBGene00017550		WBGene00007762	WBGene00008299
		WBGene00017553		WBGene00007765	WBGene00008301
		WBGene00017559		WBGene00007766	WBGene00008303
		WBGene00017573		WBGene00007771	WBGene00008304
		WBGene00017574		WBGene00007773	WBGene00008312
		WBGene00017591		WBGene00007774	WBGene00008313
		WBGene00017600		WBGene00007782	WBGene00008315
		WBGene00017613		WBGene00007784	WBGene00008332
		WBGene00017621		WBGene00007788	WBGene00008354
		WBGene00017636		WBGene00007789	WBGene00008381
		WBGene00017647		WBGene00007818	WBGene00008383
		WBGene00017658		WBGene00007836	WBGene00008392
		WBGene00017660		WBGene00007860	WBGene00008395
		WBGene00017672		WBGene00007864	WBGene00008401
		WBGene00017673		WBGene00007867	WBGene00008407
		WBGene00017678		WBGene00007872	WBGene00008408
		WBGene00017703		WBGene00007873	WBGene00008413
		WBGene00017705		WBGene00007875	WBGene00008423
		WBGene00017712		WBGene00007876	WBGene00008425
		WBGene00017719		WBGene00007886	WBGene00008433
		WBGene00017727		WBGene00007887	WBGene00008435
		WBGene00017764		WBGene00007913	WBGene00008436
		WBGene00017784		WBGene00007915	WBGene00008443
		WBGene00017802		WBGene00007917	WBGene00008448
		WBGene00017808		WBGene00007922	WBGene00008454
		WBGene00017851		WBGene00007925	WBGene00008455
		WBGene00017853		WBGene00007942	WBGene00008462
		WBGene00017902		WBGene00007944	WBGene00008482
		WBGene00017907		WBGene00007956	WBGene00008487
		WBGene00017909		WBGene00007961	WBGene00008495
		WBGene00017910		WBGene00007963	WBGene00008496
		WBGene00017922		WBGene00007964	WBGene00008497
		WBGene00017926		WBGene00007965	WBGene00008500
		WBGene00017955		WBGene00007966	WBGene00008508
		WBGene00017962		WBGene00007975	WBGene00008512
		WBGene00017970		WBGene00007979	WBGene00008519
		WBGene00017978		WBGene00007985	WBGene00008520
		WBGene00017999		WBGene00007988	WBGene00008522
		WBGene00018004		WBGene00007991	WBGene00008529
		WBGene00018025		WBGene00008000	WBGene00008541
		WBGene00018031		WBGene00008003	WBGene00008542
		WBGene00018048		WBGene00008005	WBGene00008547
		WBGene00018081		WBGene00008006	WBGene00008553
		WBGene00018082		WBGene00008016	WBGene00008554
		WBGene00018083		WBGene00008018	WBGene00008556
		WBGene00018087		WBGene00008035	WBGene00008559
		WBGene00018097		WBGene00008052	WBGene00008560
		WBGene00018098		WBGene00008053	WBGene00008568
		WBGene00018120		WBGene00008061	WBGene00008571
		WBGene00018121		WBGene00008066	WBGene00008572
		WBGene00018122		WBGene00008068	WBGene00008575
		WBGene00018123		WBGene00008070	WBGene00008577
		WBGene00018124		WBGene00008078	WBGene00008579
		WBGene00018125		WBGene00008080	WBGene00008581
		WBGene00018134		WBGene00008081	WBGene00008590
		WBGene00018158		WBGene00008105	WBGene00008594
		WBGene00018162		WBGene00008119	WBGene00008598
		WBGene00018163		WBGene00008132	WBGene00008602
		WBGene00018166		WBGene00008133	WBGene00008603
		WBGene00018167		WBGene00008138	WBGene00008605
		WBGene00018170		WBGene00008139	WBGene00008607
		WBGene00018178		WBGene00008140	WBGene00008620
		WBGene00018194		WBGene00008143	WBGene00008623
		WBGene00018206		WBGene00008145	WBGene00008629
		WBGene00018207		WBGene00008157	WBGene00008631
		WBGene00018250		WBGene00008166	WBGene00008634
		WBGene00018253		WBGene00008169	WBGene00008649
		WBGene00018297		WBGene00008170	WBGene00008650
		WBGene00018301		WBGene00008172	WBGene00008651
		WBGene00018303		WBGene00008174	WBGene00008652
		WBGene00018315		WBGene00008183	WBGene00008655
		WBGene00018332		WBGene00008207	WBGene00008659
		WBGene00018336		WBGene00008210	WBGene00008660
		WBGene00018343		WBGene00008218	WBGene00008662
		WBGene00018345		WBGene00008219	WBGene00008669
		WBGene00018347		WBGene00008232	WBGene00008681
		WBGene00018359		WBGene00008252	WBGene00008688
		WBGene00018360		WBGene00008274	WBGene00008692
		WBGene00018380		WBGene00008278	WBGene00008694
		WBGene00018393		WBGene00008281	WBGene00008707
		WBGene00018488		WBGene00008295	WBGene00008709
		WBGene00018492		WBGene00008333	WBGene00008711
		WBGene00018497		WBGene00008338	WBGene00008724
		WBGene00018500		WBGene00008339	WBGene00008725
		WBGene00018525		WBGene00008340	WBGene00008730
		WBGene00018526		WBGene00008341	WBGene00008731
		WBGene00018528		WBGene00008343	WBGene00008732
		WBGene00018530		WBGene00008350	WBGene00008734
		WBGene00018531		WBGene00008356	WBGene00008743
		WBGene00018538		WBGene00008357	WBGene00008744
		WBGene00018548		WBGene00008358	WBGene00008754
		WBGene00018563		WBGene00008359	WBGene00008759
		WBGene00018575		WBGene00008360	WBGene00008770
		WBGene00018616		WBGene00008361	WBGene00008772
		WBGene00018619		WBGene00008362	WBGene00008773
		WBGene00018645		WBGene00008365	WBGene00008776
		WBGene00018649		WBGene00008377	WBGene00008787
		WBGene00018724		WBGene00008378	WBGene00008792
		WBGene00018729		WBGene00008380	WBGene00008793
		WBGene00018730		WBGene00008384	WBGene00008801
		WBGene00018744		WBGene00008385	WBGene00008803
		WBGene00018745		WBGene00008388	WBGene00008804
		WBGene00018760		WBGene00008389	WBGene00008811
		WBGene00018773		WBGene00008390	WBGene00008820
		WBGene00018792		WBGene00008393	WBGene00008821
		WBGene00018811		WBGene00008394	WBGene00008832
		WBGene00018813		WBGene00008397	WBGene00008840
		WBGene00018823		WBGene00008399	WBGene00008850
		WBGene00018885		WBGene00008417	WBGene00008851
		WBGene00018895		WBGene00008422	WBGene00008854
		WBGene00018926		WBGene00008432	WBGene00008862
		WBGene00018930		WBGene00008440	WBGene00008870
		WBGene00018945		WBGene00008447	WBGene00008871
		WBGene00018969		WBGene00008464	WBGene00008874
		WBGene00018980		WBGene00008480	WBGene00008886
		WBGene00019015		WBGene00008484	WBGene00008897
		WBGene00019024		WBGene00008485	WBGene00008900
		WBGene00019026		WBGene00008494	WBGene00008907
		WBGene00019030		WBGene00008503	WBGene00008910
		WBGene00019062		WBGene00008510	WBGene00008912
		WBGene00019063		WBGene00008515	WBGene00008913
		WBGene00019081		WBGene00008526	WBGene00008914
		WBGene00019086		WBGene00008532	WBGene00008915
		WBGene00019090		WBGene00008533	WBGene00008916
		WBGene00019105		WBGene00008535	WBGene00008917
		WBGene00019111		WBGene00008536	WBGene00008923
		WBGene00019151		WBGene00008537	WBGene00008925
		WBGene00019152		WBGene00008538	WBGene00008929
		WBGene00019165		WBGene00008546	WBGene00008934
		WBGene00019182		WBGene00008549	WBGene00008935
		WBGene00019197		WBGene00008555	WBGene00008945
		WBGene00019213		WBGene00008561	WBGene00008950
		WBGene00019214		WBGene00008563	WBGene00008978
		WBGene00019248		WBGene00008565	WBGene00008989
		WBGene00019255		WBGene00008566	WBGene00008993
		WBGene00019262		WBGene00008580	WBGene00008994
		WBGene00019273		WBGene00008583	WBGene00008998
		WBGene00019322		WBGene00008584	WBGene00009005
		WBGene00019337		WBGene00008586	WBGene00009008
		WBGene00019406		WBGene00008596	WBGene00009016
		WBGene00019410		WBGene00008611	WBGene00009023
		WBGene00019430		WBGene00008612	WBGene00009028
		WBGene00019431		WBGene00008621	WBGene00009030
		WBGene00019450		WBGene00008622	WBGene00009031
		WBGene00019461		WBGene00008632	WBGene00009039
		WBGene00019489		WBGene00008633	WBGene00009042
		WBGene00019515		WBGene00008645	WBGene00009043
		WBGene00019530		WBGene00008654	WBGene00009048
		WBGene00019531		WBGene00008670	WBGene00009049
		WBGene00019537		WBGene00008677	WBGene00009056
		WBGene00019540		WBGene00008680	WBGene00009057
		WBGene00019550		WBGene00008682	WBGene00009068
		WBGene00019561		WBGene00008684	WBGene00009075
		WBGene00019562		WBGene00008685	WBGene00009079
		WBGene00019572		WBGene00008686	WBGene00009081
		WBGene00019586		WBGene00008710	WBGene00009090
		WBGene00019599		WBGene00008714	WBGene00009097
		WBGene00019601		WBGene00008720	WBGene00009099
		WBGene00019605		WBGene00008723	WBGene00009100
		WBGene00019626		WBGene00008729	WBGene00009101
		WBGene00019642		WBGene00008740	WBGene00009115
		WBGene00019645		WBGene00008747	WBGene00009125
		WBGene00019654		WBGene00008755	WBGene00009129
		WBGene00019660		WBGene00008774	WBGene00009143
		WBGene00019663		WBGene00008775	WBGene00009146
		WBGene00019684		WBGene00008780	WBGene00009149
		WBGene00019688		WBGene00008782	WBGene00009154
		WBGene00019689		WBGene00008784	WBGene00009160
		WBGene00019727		WBGene00008789	WBGene00009165
		WBGene00019744		WBGene00008800	WBGene00009171
		WBGene00019754		WBGene00008812	WBGene00009178
		WBGene00019772		WBGene00008822	WBGene00009182
		WBGene00019783		WBGene00008823	WBGene00009185
		WBGene00019785		WBGene00008824	WBGene00009193
		WBGene00019830		WBGene00008825	WBGene00009195
		WBGene00019840		WBGene00008838	WBGene00009205
		WBGene00019900		WBGene00008841	WBGene00009209
		WBGene00019920		WBGene00008844	WBGene00009216
		WBGene00019932		WBGene00008847	WBGene00009217
		WBGene00019945		WBGene00008848	WBGene00009218
		WBGene00019949		WBGene00008849	WBGene00009221
		WBGene00019951		WBGene00008878	WBGene00009236
		WBGene00020003		WBGene00008882	WBGene00009237
		WBGene00020029		WBGene00008904	WBGene00009239
		WBGene00020033		WBGene00008921	WBGene00009241
		WBGene00020039		WBGene00008922	WBGene00009246
		WBGene00020040		WBGene00008944	WBGene00009250
		WBGene00020054		WBGene00008955	WBGene00009255
		WBGene00020070		WBGene00008959	WBGene00009257
		WBGene00020071		WBGene00008964	WBGene00009259
		WBGene00020072		WBGene00008968	WBGene00009261
		WBGene00020084		WBGene00008975	WBGene00009266
		WBGene00020105		WBGene00008991	WBGene00009268
		WBGene00020116		WBGene00008996	WBGene00009269
		WBGene00020121		WBGene00008999	WBGene00009271
		WBGene00020128		WBGene00009006	WBGene00009274
		WBGene00020144		WBGene00009035	WBGene00009291
		WBGene00020146		WBGene00009045	WBGene00009293
		WBGene00020155		WBGene00009052	WBGene00009304
		WBGene00020156		WBGene00009063	WBGene00009308
		WBGene00020187		WBGene00009064	WBGene00009313
		WBGene00020201		WBGene00009065	WBGene00009316
		WBGene00020216		WBGene00009067	WBGene00009321
		WBGene00020223		WBGene00009069	WBGene00009324
		WBGene00020237		WBGene00009086	WBGene00009325
		WBGene00020265		WBGene00009088	WBGene00009331
		WBGene00020282		WBGene00009089	WBGene00009333
		WBGene00020289		WBGene00009106	WBGene00009334
		WBGene00020313		WBGene00009112	WBGene00009344
		WBGene00020325		WBGene00009113	WBGene00009349
		WBGene00020350		WBGene00009118	WBGene00009355
		WBGene00020353		WBGene00009132	WBGene00009356
		WBGene00020356		WBGene00009141	WBGene00009358
		WBGene00020360		WBGene00009156	WBGene00009360
		WBGene00020369		WBGene00009157	WBGene00009377
		WBGene00020370		WBGene00009158	WBGene00009386
		WBGene00020372		WBGene00009164	WBGene00009388
		WBGene00020414		WBGene00009172	WBGene00009389
		WBGene00020416		WBGene00009173	WBGene00009390
		WBGene00020444		WBGene00009174	WBGene00009400
		WBGene00020471		WBGene00009180	WBGene00009401
		WBGene00020507		WBGene00009186	WBGene00009402
		WBGene00020531		WBGene00009188	WBGene00009403
		WBGene00020560		WBGene00009192	WBGene00009405
		WBGene00020567		WBGene00009201	WBGene00009406
		WBGene00020589		WBGene00009202	WBGene00009412
		WBGene00020609		WBGene00009212	WBGene00009413
		WBGene00020616		WBGene00009213	WBGene00009416
		WBGene00020617		WBGene00009215	WBGene00009429
		WBGene00020659		WBGene00009219	WBGene00009430
		WBGene00020661		WBGene00009222	WBGene00009432
		WBGene00020713		WBGene00009233	WBGene00009433
		WBGene00020715		WBGene00009234	WBGene00009434
		WBGene00020722		WBGene00009245	WBGene00009446
		WBGene00020730		WBGene00009254	WBGene00009447
		WBGene00020732		WBGene00009262	WBGene00009449
		WBGene00020756		WBGene00009267	WBGene00009457
		WBGene00020788		WBGene00009270	WBGene00009458
		WBGene00020840		WBGene00009272	WBGene00009459
		WBGene00020841		WBGene00009283	WBGene00009463
		WBGene00020860		WBGene00009284	WBGene00009467
		WBGene00020869		WBGene00009285	WBGene00009470
		WBGene00020873		WBGene00009286	WBGene00009471
		WBGene00020881		WBGene00009287	WBGene00009473
		WBGene00020890		WBGene00009290	WBGene00009475
		WBGene00020895		WBGene00009297	WBGene00009476
		WBGene00020905		WBGene00009300	WBGene00009483
		WBGene00020913		WBGene00009301	WBGene00009485
		WBGene00020921		WBGene00009302	WBGene00009487
		WBGene00020938		WBGene00009311	WBGene00009489
		WBGene00020944		WBGene00009314	WBGene00009492
		WBGene00020945		WBGene00009342	WBGene00009493
		WBGene00020952		WBGene00009343	WBGene00009496
		WBGene00020954		WBGene00009346	WBGene00009501
		WBGene00020987		WBGene00009361	WBGene00009502
		WBGene00020989		WBGene00009364	WBGene00009512
		WBGene00020990		WBGene00009365	WBGene00009513
		WBGene00020991		WBGene00009366	WBGene00009515
		WBGene00021006		WBGene00009367	WBGene00009518
		WBGene00021007		WBGene00009368	WBGene00009526
		WBGene00021020		WBGene00009370	WBGene00009528
		WBGene00021070		WBGene00009372	WBGene00009532
		WBGene00021072		WBGene00009385	WBGene00009533
		WBGene00021089		WBGene00009396	WBGene00009548
		WBGene00021096		WBGene00009404	WBGene00009549
		WBGene00021113		WBGene00009408	WBGene00009550
		WBGene00021118		WBGene00009427	WBGene00009560
		WBGene00021142		WBGene00009435	WBGene00009561
		WBGene00021154		WBGene00009441	WBGene00009572
		WBGene00021178		WBGene00009444	WBGene00009577
		WBGene00021190		WBGene00009445	WBGene00009581
		WBGene00021207		WBGene00009448	WBGene00009589
		WBGene00021214		WBGene00009451	WBGene00009592
		WBGene00021252		WBGene00009456	WBGene00009595
		WBGene00021268		WBGene00009460	WBGene00009605
		WBGene00021275		WBGene00009466	WBGene00009620
		WBGene00021286		WBGene00009469	WBGene00009621
		WBGene00021288		WBGene00009477	WBGene00009624
		WBGene00021298		WBGene00009498	WBGene00009625
		WBGene00021322		WBGene00009499	WBGene00009641
		WBGene00021326		WBGene00009507	WBGene00009643
		WBGene00021340		WBGene00009508	WBGene00009645
		WBGene00021354		WBGene00009537	WBGene00009646
		WBGene00021358		WBGene00009539	WBGene00009649
		WBGene00021381		WBGene00009542	WBGene00009660
		WBGene00021386		WBGene00009546	WBGene00009666
		WBGene00021398		WBGene00009551	WBGene00009670
		WBGene00021401		WBGene00009552	WBGene00009677
		WBGene00021420		WBGene00009553	WBGene00009680
		WBGene00021427		WBGene00009556	WBGene00009681
		WBGene00021428		WBGene00009580	WBGene00009682
		WBGene00021448		WBGene00009583	WBGene00009683
		WBGene00021471		WBGene00009587	WBGene00009684
		WBGene00021472		WBGene00009594	WBGene00009685
		WBGene00021565		WBGene00009606	WBGene00009695
		WBGene00021579		WBGene00009617	WBGene00009704
		WBGene00021581		WBGene00009618	WBGene00009705
		WBGene00021583		WBGene00009627	WBGene00009706
		WBGene00021586		WBGene00009634	WBGene00009708
		WBGene00021587		WBGene00009636	WBGene00009710
		WBGene00021590		WBGene00009637	WBGene00009711
		WBGene00021600		WBGene00009638	WBGene00009714
		WBGene00021608		WBGene00009639	WBGene00009716
		WBGene00021616		WBGene00009640	WBGene00009723
		WBGene00021619		WBGene00009648	WBGene00009724
		WBGene00021620		WBGene00009654	WBGene00009741
		WBGene00021623		WBGene00009658	WBGene00009746
		WBGene00021625		WBGene00009659	WBGene00009747
		WBGene00021650		WBGene00009661	WBGene00009748
		WBGene00021690		WBGene00009662	WBGene00009751
		WBGene00021703		WBGene00009665	WBGene00009753
		WBGene00021720		WBGene00009668	WBGene00009754
		WBGene00021787		WBGene00009674	WBGene00009755
		WBGene00021796		WBGene00009696	WBGene00009759
		WBGene00021873		WBGene00009698	WBGene00009777
		WBGene00021874		WBGene00009701	WBGene00009781
		WBGene00021878		WBGene00009729	WBGene00009782
		WBGene00021880		WBGene00009744	WBGene00009785
		WBGene00021895		WBGene00009770	WBGene00009791
		WBGene00021968		WBGene00009787	WBGene00009796
		WBGene00021969		WBGene00009789	WBGene00009798
		WBGene00021993		WBGene00009793	WBGene00009800
		WBGene00021996		WBGene00009803	WBGene00009805
		WBGene00021997		WBGene00009820	WBGene00009806
		WBGene00022002		WBGene00009823	WBGene00009807
		WBGene00022005		WBGene00009834	WBGene00009813
		WBGene00022006		WBGene00009851	WBGene00009824
		WBGene00022007		WBGene00009861	WBGene00009830
		WBGene00022030		WBGene00009862	WBGene00009842
		WBGene00022032		WBGene00009878	WBGene00009843
		WBGene00022064		WBGene00009883	WBGene00009848
		WBGene00022072		WBGene00009897	WBGene00009850
		WBGene00022090		WBGene00009898	WBGene00009857
		WBGene00022093		WBGene00009921	WBGene00009879
		WBGene00022102		WBGene00009924	WBGene00009882
		WBGene00022122		WBGene00009930	WBGene00009884
		WBGene00022125		WBGene00009937	WBGene00009886
		WBGene00022132		WBGene00009939	WBGene00009890
		WBGene00022133		WBGene00009940	WBGene00009893
		WBGene00022143		WBGene00009946	WBGene00009895
		WBGene00022155		WBGene00009951	WBGene00009896
		WBGene00022157		WBGene00009974	WBGene00009903
		WBGene00022162		WBGene00009975	WBGene00009904
		WBGene00022188		WBGene00009977	WBGene00009908
		WBGene00022201		WBGene00010002	WBGene00009914
		WBGene00022246		WBGene00010006	WBGene00009916
		WBGene00022261		WBGene00010011	WBGene00009925
		WBGene00022270		WBGene00010013	WBGene00009938
		WBGene00022383		WBGene00010028	WBGene00009941
		WBGene00022385		WBGene00010036	WBGene00009942
		WBGene00022410		WBGene00010037	WBGene00009943
		WBGene00022411		WBGene00010048	WBGene00009947
		WBGene00022444		WBGene00010051	WBGene00009948
		WBGene00022467		WBGene00010053	WBGene00009956
		WBGene00022490		WBGene00010054	WBGene00009957
		WBGene00022497		WBGene00010061	WBGene00009959
		WBGene00022505		WBGene00010064	WBGene00009962
		WBGene00022541		WBGene00010066	WBGene00009963
		WBGene00022550		WBGene00010080	WBGene00009968
		WBGene00022570		WBGene00010081	WBGene00009971
		WBGene00022589		WBGene00010084	WBGene00009982
		WBGene00022610		WBGene00010085	WBGene00009983
		WBGene00022617		WBGene00010087	WBGene00009984
		WBGene00022621		WBGene00010093	WBGene00009985
		WBGene00022632		WBGene00010098	WBGene00009995
		WBGene00022634		WBGene00010100	WBGene00010001
		WBGene00022645		WBGene00010101	WBGene00010005
		WBGene00022649		WBGene00010104	WBGene00010008
		WBGene00022650		WBGene00010105	WBGene00010014
		WBGene00022652		WBGene00010106	WBGene00010019
		WBGene00022679		WBGene00010113	WBGene00010034
		WBGene00022680		WBGene00010120	WBGene00010035
		WBGene00022705		WBGene00010124	WBGene00010045
		WBGene00022707		WBGene00010139	WBGene00010046
		WBGene00022708		WBGene00010142	WBGene00010047
		WBGene00022709		WBGene00010149	WBGene00010058
		WBGene00022751		WBGene00010158	WBGene00010059
		WBGene00022753		WBGene00010159	WBGene00010063
		WBGene00022754		WBGene00010160	WBGene00010065
		WBGene00022760		WBGene00010174	WBGene00010070
		WBGene00022761		WBGene00010194	WBGene00010072
		WBGene00022777		WBGene00010195	WBGene00010073
		WBGene00022778		WBGene00010196	WBGene00010074
		WBGene00022780		WBGene00010197	WBGene00010079
		WBGene00022782		WBGene00010198	WBGene00010082
		WBGene00022814		WBGene00010199	WBGene00010083
		WBGene00022849		WBGene00010204	WBGene00010086
		WBGene00022875		WBGene00010219	WBGene00010091
		WBGene00022876		WBGene00010229	WBGene00010111
		WBGene00022884		WBGene00010233	WBGene00010114
		WBGene00022886		WBGene00010234	WBGene00010117
		WBGene00022888		WBGene00010240	WBGene00010125
		WBGene00023424		WBGene00010244	WBGene00010133
		WBGene00023432		WBGene00010260	WBGene00010135
		WBGene00023483		WBGene00010262	WBGene00010136
		WBGene00043062		WBGene00010263	WBGene00010137
		WBGene00043147		WBGene00010264	WBGene00010146
		WBGene00043743		WBGene00010279	WBGene00010147
		WBGene00043980		WBGene00010280	WBGene00010150
		WBGene00043985		WBGene00010281	WBGene00010152
		WBGene00044003		WBGene00010304	WBGene00010155
		WBGene00044006		WBGene00010348	WBGene00010172
		WBGene00044007		WBGene00010351	WBGene00010175
		WBGene00044062		WBGene00010353	WBGene00010179
		WBGene00044107		WBGene00010356	WBGene00010181
		WBGene00044109		WBGene00010362	WBGene00010187
		WBGene00044122		WBGene00010363	WBGene00010191
		WBGene00044174		WBGene00010364	WBGene00010212
		WBGene00044175		WBGene00010367	WBGene00010225
		WBGene00044177		WBGene00010370	WBGene00010226
		WBGene00044227		WBGene00010396	WBGene00010228
		WBGene00044237		WBGene00010399	WBGene00010230
		WBGene00044243		WBGene00010401	WBGene00010231
		WBGene00044271		WBGene00010406	WBGene00010236
		WBGene00044272		WBGene00010409	WBGene00010237
		WBGene00044273		WBGene00010411	WBGene00010238
		WBGene00044274		WBGene00010420	WBGene00010239
		WBGene00044280		WBGene00010427	WBGene00010241
		WBGene00044287		WBGene00010428	WBGene00010245
		WBGene00044298		WBGene00010440	WBGene00010246
		WBGene00044339		WBGene00010465	WBGene00010247
		WBGene00044349		WBGene00010470	WBGene00010254
		WBGene00044367		WBGene00010471	WBGene00010265
		WBGene00044382		WBGene00010476	WBGene00010266
		WBGene00044388		WBGene00010477	WBGene00010267
		WBGene00044402		WBGene00010483	WBGene00010269
		WBGene00044418		WBGene00010491	WBGene00010273
		WBGene00044445		WBGene00010492	WBGene00010285
		WBGene00044447		WBGene00010493	WBGene00010289
		WBGene00044450		WBGene00010495	WBGene00010290
		WBGene00044451		WBGene00010504	WBGene00010292
		WBGene00044457		WBGene00010519	WBGene00010293
		WBGene00044474		WBGene00010537	WBGene00010296
		WBGene00044475		WBGene00010539	WBGene00010300
		WBGene00044476		WBGene00010542	WBGene00010301
		WBGene00044529		WBGene00010549	WBGene00010309
		WBGene00044544		WBGene00010551	WBGene00010311
		WBGene00044569		WBGene00010552	WBGene00010314
		WBGene00044633		WBGene00010553	WBGene00010323
		WBGene00044634		WBGene00010555	WBGene00010324
		WBGene00044644		WBGene00010561	WBGene00010328
		WBGene00044674		WBGene00010565	WBGene00010336
		WBGene00044684		WBGene00010568	WBGene00010340
		WBGene00044696		WBGene00010569	WBGene00010341
		WBGene00044741		WBGene00010583	WBGene00010342
		WBGene00044777		WBGene00010593	WBGene00010345
		WBGene00044783		WBGene00010606	WBGene00010355
		WBGene00044784		WBGene00010609	WBGene00010357
		WBGene00044790		WBGene00010613	WBGene00010366
		WBGene00044801		WBGene00010621	WBGene00010368
		WBGene00044802		WBGene00010641	WBGene00010373
		WBGene00044810		WBGene00010659	WBGene00010374
		WBGene00044911		WBGene00010663	WBGene00010377
		WBGene00044912		WBGene00010664	WBGene00010378
		WBGene00044988		WBGene00010667	WBGene00010381
		WBGene00045013		WBGene00010670	WBGene00010385
		WBGene00045239		WBGene00010671	WBGene00010386
		WBGene00045275		WBGene00010677	WBGene00010391
		WBGene00045276		WBGene00010678	WBGene00010421
		WBGene00045305		WBGene00010684	WBGene00010422
		WBGene00045306		WBGene00010685	WBGene00010424
		WBGene00045331		WBGene00010689	WBGene00010446
		WBGene00045355		WBGene00010690	WBGene00010448
		WBGene00045387		WBGene00010691	WBGene00010456
		WBGene00045390		WBGene00010693	WBGene00010460
		WBGene00045393		WBGene00010705	WBGene00010461
		WBGene00045401		WBGene00010706	WBGene00010466
		WBGene00045416		WBGene00010708	WBGene00010467
		WBGene00045457		WBGene00010720	WBGene00010468
		WBGene00045458		WBGene00010726	WBGene00010474
		WBGene00050881		WBGene00010730	WBGene00010475
		WBGene00050899		WBGene00010731	WBGene00010485
		WBGene00050915		WBGene00010734	WBGene00010486
		WBGene00050940		WBGene00010736	WBGene00010487
		WBGene00050956		WBGene00010747	WBGene00010499
		WBGene00077497		WBGene00010757	WBGene00010503
		WBGene00077519		WBGene00010759	WBGene00010508
		WBGene00077563		WBGene00010767	WBGene00010509
		WBGene00077593		WBGene00010769	WBGene00010510
		WBGene00077684		WBGene00010770	WBGene00010512
		WBGene00077685		WBGene00010785	WBGene00010513
		WBGene00077696		WBGene00010787	WBGene00010514
		WBGene00077775		WBGene00010806	WBGene00010516
		WBGene00086554		WBGene00010807	WBGene00010524
		WBGene00086567		WBGene00010808	WBGene00010525
		WBGene00086568		WBGene00010810	WBGene00010526
		WBGene00194647		WBGene00010815	WBGene00010531
		WBGene00194654		WBGene00010827	WBGene00010540
		WBGene00194664		WBGene00010828	WBGene00010544
		WBGene00194700		WBGene00010836	WBGene00010545
		WBGene00194703		WBGene00010839	WBGene00010547
		WBGene00194711		WBGene00010840	WBGene00010563
		WBGene00194787		WBGene00010842	WBGene00010566
		WBGene00194816		WBGene00010872	WBGene00010571
		WBGene00194855		WBGene00010882	WBGene00010574
		WBGene00194864		WBGene00010908	WBGene00010575
		WBGene00194894		WBGene00010910	WBGene00010578
		WBGene00194902		WBGene00010912	WBGene00010579
		WBGene00194908		WBGene00010923	WBGene00010587
		WBGene00194925		WBGene00010953	WBGene00010594
		WBGene00194935		WBGene00010958	WBGene00010595
		WBGene00195068		WBGene00010972	WBGene00010605
		WBGene00195075		WBGene00010975	WBGene00010611
		WBGene00195076		WBGene00010976	WBGene00010612
		WBGene00195164		WBGene00010981	WBGene00010623
		WBGene00195182		WBGene00010989	WBGene00010630
		WBGene00195246		WBGene00011000	WBGene00010633
		WBGene00206354		WBGene00011010	WBGene00010634
		WBGene00206368		WBGene00011011	WBGene00010638
		WBGene00206372		WBGene00011012	WBGene00010644
		WBGene00206419		WBGene00011036	WBGene00010648
		WBGene00219216		WBGene00011037	WBGene00010650
		WBGene00219289		WBGene00011038	WBGene00010651
		WBGene00219296		WBGene00011044	WBGene00010653
				WBGene00011047	WBGene00010655
				WBGene00011049	WBGene00010657
				WBGene00011050	WBGene00010658
				WBGene00011054	WBGene00010660
				WBGene00011061	WBGene00010661
				WBGene00011063	WBGene00010672
				WBGene00011068	WBGene00010675
				WBGene00011069	WBGene00010679
				WBGene00011071	WBGene00010682
				WBGene00011087	WBGene00010683
				WBGene00011089	WBGene00010703
				WBGene00011107	WBGene00010712
				WBGene00011111	WBGene00010714
				WBGene00011112	WBGene00010715
				WBGene00011124	WBGene00010716
				WBGene00011142	WBGene00010717
				WBGene00011146	WBGene00010718
				WBGene00011152	WBGene00010719
				WBGene00011153	WBGene00010723
				WBGene00011190	WBGene00010727
				WBGene00011195	WBGene00010728
				WBGene00011202	WBGene00010732
				WBGene00011205	WBGene00010740
				WBGene00011226	WBGene00010741
				WBGene00011229	WBGene00010742
				WBGene00011231	WBGene00010744
				WBGene00011240	WBGene00010745
				WBGene00011250	WBGene00010749
				WBGene00011258	WBGene00010755
				WBGene00011267	WBGene00010760
				WBGene00011275	WBGene00010761
				WBGene00011276	WBGene00010763
				WBGene00011279	WBGene00010765
				WBGene00011282	WBGene00010774
				WBGene00011299	WBGene00010779
				WBGene00011300	WBGene00010784
				WBGene00011304	WBGene00010789
				WBGene00011312	WBGene00010793
				WBGene00011315	WBGene00010809
				WBGene00011318	WBGene00010811
				WBGene00011324	WBGene00010812
				WBGene00011329	WBGene00010813
				WBGene00011338	WBGene00010822
				WBGene00011349	WBGene00010829
				WBGene00011350	WBGene00010834
				WBGene00011352	WBGene00010848
				WBGene00011362	WBGene00010850
				WBGene00011368	WBGene00010851
				WBGene00011376	WBGene00010856
				WBGene00011388	WBGene00010859
				WBGene00011393	WBGene00010863
				WBGene00011399	WBGene00010868
				WBGene00011407	WBGene00010869
				WBGene00011417	WBGene00010870
				WBGene00011418	WBGene00010871
				WBGene00011420	WBGene00010873
				WBGene00011431	WBGene00010874
				WBGene00011432	WBGene00010876
				WBGene00011434	WBGene00010881
				WBGene00011449	WBGene00010883
				WBGene00011463	WBGene00010885
				WBGene00011464	WBGene00010886
				WBGene00011475	WBGene00010887
				WBGene00011486	WBGene00010888
				WBGene00011489	WBGene00010896
				WBGene00011501	WBGene00010900
				WBGene00011505	WBGene00010902
				WBGene00011509	WBGene00010906
				WBGene00011529	WBGene00010915
				WBGene00011560	WBGene00010920
				WBGene00011562	WBGene00010924
				WBGene00011580	WBGene00010925
				WBGene00011583	WBGene00010933
				WBGene00011584	WBGene00010935
				WBGene00011589	WBGene00010936
				WBGene00011597	WBGene00010944
				WBGene00011604	WBGene00010946
				WBGene00011605	WBGene00010948
				WBGene00011614	WBGene00010960
				WBGene00011615	WBGene00010965
				WBGene00011625	WBGene00010967
				WBGene00011629	WBGene00010969
				WBGene00011636	WBGene00010970
				WBGene00011638	WBGene00010977
				WBGene00011642	WBGene00010980
				WBGene00011645	WBGene00010983
				WBGene00011647	WBGene00010986
				WBGene00011680	WBGene00010988
				WBGene00011687	WBGene00010991
				WBGene00011688	WBGene00010992
				WBGene00011694	WBGene00010998
				WBGene00011704	WBGene00011001
				WBGene00011706	WBGene00011004
				WBGene00011713	WBGene00011006
				WBGene00011720	WBGene00011008
				WBGene00011722	WBGene00011019
				WBGene00011729	WBGene00011021
				WBGene00011733	WBGene00011026
				WBGene00011735	WBGene00011027
				WBGene00011742	WBGene00011039
				WBGene00011746	WBGene00011042
				WBGene00011761	WBGene00011059
				WBGene00011763	WBGene00011072
				WBGene00011773	WBGene00011073
				WBGene00011775	WBGene00011076
				WBGene00011791	WBGene00011082
				WBGene00011804	WBGene00011090
				WBGene00011805	WBGene00011097
				WBGene00011806	WBGene00011098
				WBGene00011807	WBGene00011102
				WBGene00011809	WBGene00011108
				WBGene00011815	WBGene00011114
				WBGene00011819	WBGene00011120
				WBGene00011820	WBGene00011123
				WBGene00011828	WBGene00011128
				WBGene00011833	WBGene00011129
				WBGene00011834	WBGene00011130
				WBGene00011835	WBGene00011132
				WBGene00011862	WBGene00011133
				WBGene00011867	WBGene00011134
				WBGene00011870	WBGene00011135
				WBGene00011871	WBGene00011167
				WBGene00011884	WBGene00011171
				WBGene00011887	WBGene00011172
				WBGene00011890	WBGene00011173
				WBGene00011892	WBGene00011174
				WBGene00011894	WBGene00011176
				WBGene00011898	WBGene00011177
				WBGene00011923	WBGene00011179
				WBGene00011932	WBGene00011180
				WBGene00011935	WBGene00011183
				WBGene00011939	WBGene00011184
				WBGene00011940	WBGene00011185
				WBGene00011945	WBGene00011191
				WBGene00011959	WBGene00011200
				WBGene00011962	WBGene00011203
				WBGene00011979	WBGene00011207
				WBGene00011980	WBGene00011212
				WBGene00011981	WBGene00011213
				WBGene00011984	WBGene00011214
				WBGene00011985	WBGene00011215
				WBGene00011986	WBGene00011217
				WBGene00011988	WBGene00011227
				WBGene00011994	WBGene00011235
				WBGene00012000	WBGene00011238
				WBGene00012002	WBGene00011241
				WBGene00012015	WBGene00011244
				WBGene00012019	WBGene00011257
				WBGene00012020	WBGene00011262
				WBGene00012021	WBGene00011269
				WBGene00012028	WBGene00011277
				WBGene00012038	WBGene00011278
				WBGene00012041	WBGene00011283
				WBGene00012063	WBGene00011284
				WBGene00012064	WBGene00011286
				WBGene00012065	WBGene00011289
				WBGene00012073	WBGene00011290
				WBGene00012074	WBGene00011295
				WBGene00012095	WBGene00011297
				WBGene00012104	WBGene00011321
				WBGene00012106	WBGene00011322
				WBGene00012110	WBGene00011325
				WBGene00012111	WBGene00011328
				WBGene00012117	WBGene00011333
				WBGene00012119	WBGene00011334
				WBGene00012122	WBGene00011335
				WBGene00012128	WBGene00011336
				WBGene00012140	WBGene00011337
				WBGene00012149	WBGene00011339
				WBGene00012151	WBGene00011340
				WBGene00012156	WBGene00011351
				WBGene00012167	WBGene00011365
				WBGene00012175	WBGene00011373
				WBGene00012176	WBGene00011374
				WBGene00012182	WBGene00011378
				WBGene00012187	WBGene00011379
				WBGene00012188	WBGene00011381
				WBGene00012198	WBGene00011382
				WBGene00012203	WBGene00011392
				WBGene00012208	WBGene00011400
				WBGene00012209	WBGene00011401
				WBGene00012211	WBGene00011404
				WBGene00012212	WBGene00011412
				WBGene00012213	WBGene00011414
				WBGene00012220	WBGene00011422
				WBGene00012221	WBGene00011423
				WBGene00012222	WBGene00011425
				WBGene00012230	WBGene00011428
				WBGene00012231	WBGene00011429
				WBGene00012236	WBGene00011438
				WBGene00012238	WBGene00011439
				WBGene00012240	WBGene00011440
				WBGene00012241	WBGene00011445
				WBGene00012243	WBGene00011446
				WBGene00012245	WBGene00011448
				WBGene00012276	WBGene00011452
				WBGene00012299	WBGene00011454
				WBGene00012300	WBGene00011460
				WBGene00012301	WBGene00011462
				WBGene00012316	WBGene00011466
				WBGene00012317	WBGene00011467
				WBGene00012319	WBGene00011469
				WBGene00012324	WBGene00011472
				WBGene00012325	WBGene00011473
				WBGene00012326	WBGene00011478
				WBGene00012337	WBGene00011479
				WBGene00012347	WBGene00011480
				WBGene00012348	WBGene00011487
				WBGene00012352	WBGene00011491
				WBGene00012353	WBGene00011492
				WBGene00012356	WBGene00011493
				WBGene00012360	WBGene00011494
				WBGene00012362	WBGene00011495
				WBGene00012369	WBGene00011498
				WBGene00012370	WBGene00011499
				WBGene00012387	WBGene00011517
				WBGene00012389	WBGene00011520
				WBGene00012395	WBGene00011530
				WBGene00012404	WBGene00011533
				WBGene00012405	WBGene00011538
				WBGene00012420	WBGene00011548
				WBGene00012423	WBGene00011554
				WBGene00012431	WBGene00011556
				WBGene00012434	WBGene00011557
				WBGene00012435	WBGene00011559
				WBGene00012436	WBGene00011571
				WBGene00012442	WBGene00011579
				WBGene00012458	WBGene00011590
				WBGene00012463	WBGene00011592
				WBGene00012466	WBGene00011593
				WBGene00012468	WBGene00011594
				WBGene00012469	WBGene00011619
				WBGene00012472	WBGene00011665
				WBGene00012474	WBGene00011668
				WBGene00012481	WBGene00011669
				WBGene00012484	WBGene00011671
				WBGene00012490	WBGene00011672
				WBGene00012492	WBGene00011676
				WBGene00012512	WBGene00011677
				WBGene00012522	WBGene00011684
				WBGene00012524	WBGene00011685
				WBGene00012530	WBGene00011692
				WBGene00012543	WBGene00011699
				WBGene00012546	WBGene00011707
				WBGene00012551	WBGene00011708
				WBGene00012552	WBGene00011721
				WBGene00012555	WBGene00011724
				WBGene00012557	WBGene00011727
				WBGene00012562	WBGene00011730
				WBGene00012565	WBGene00011736
				WBGene00012581	WBGene00011745
				WBGene00012584	WBGene00011749
				WBGene00012588	WBGene00011753
				WBGene00012600	WBGene00011755
				WBGene00012641	WBGene00011756
				WBGene00012650	WBGene00011768
				WBGene00012651	WBGene00011777
				WBGene00012663	WBGene00011790
				WBGene00012672	WBGene00011793
				WBGene00012674	WBGene00011795
				WBGene00012694	WBGene00011796
				WBGene00012695	WBGene00011798
				WBGene00012700	WBGene00011800
				WBGene00012704	WBGene00011801
				WBGene00012715	WBGene00011808
				WBGene00012716	WBGene00011817
				WBGene00012717	WBGene00011821
				WBGene00012718	WBGene00011824
				WBGene00012719	WBGene00011836
				WBGene00012727	WBGene00011838
				WBGene00012730	WBGene00011839
				WBGene00012733	WBGene00011850
				WBGene00012734	WBGene00011854
				WBGene00012740	WBGene00011855
				WBGene00012747	WBGene00011856
				WBGene00012750	WBGene00011857
				WBGene00012762	WBGene00011880
				WBGene00012765	WBGene00011888
				WBGene00012767	WBGene00011891
				WBGene00012769	WBGene00011895
				WBGene00012788	WBGene00011900
				WBGene00012789	WBGene00011904
				WBGene00012790	WBGene00011906
				WBGene00012792	WBGene00011909
				WBGene00012795	WBGene00011910
				WBGene00012802	WBGene00011911
				WBGene00012803	WBGene00011913
				WBGene00012804	WBGene00011918
				WBGene00012810	WBGene00011919
				WBGene00012828	WBGene00011921
				WBGene00012835	WBGene00011926
				WBGene00012841	WBGene00011927
				WBGene00012844	WBGene00011929
				WBGene00012845	WBGene00011936
				WBGene00012851	WBGene00011938
				WBGene00012868	WBGene00011944
				WBGene00012878	WBGene00011951
				WBGene00012880	WBGene00011954
				WBGene00012888	WBGene00011961
				WBGene00012894	WBGene00011964
				WBGene00012896	WBGene00011966
				WBGene00012897	WBGene00011968
				WBGene00012899	WBGene00011973
				WBGene00012900	WBGene00011974
				WBGene00012907	WBGene00012003
				WBGene00012916	WBGene00012007
				WBGene00012920	WBGene00012008
				WBGene00012935	WBGene00012010
				WBGene00012936	WBGene00012011
				WBGene00012958	WBGene00012012
				WBGene00012971	WBGene00012013
				WBGene00012972	WBGene00012014
				WBGene00012973	WBGene00012018
				WBGene00012976	WBGene00012032
				WBGene00012981	WBGene00012034
				WBGene00012982	WBGene00012035
				WBGene00012990	WBGene00012039
				WBGene00012994	WBGene00012059
				WBGene00012995	WBGene00012062
				WBGene00013000	WBGene00012070
				WBGene00013006	WBGene00012081
				WBGene00013007	WBGene00012087
				WBGene00013008	WBGene00012097
				WBGene00013011	WBGene00012100
				WBGene00013014	WBGene00012101
				WBGene00013015	WBGene00012102
				WBGene00013018	WBGene00012107
				WBGene00013019	WBGene00012113
				WBGene00013021	WBGene00012114
				WBGene00013024	WBGene00012120
				WBGene00013030	WBGene00012124
				WBGene00013034	WBGene00012127
				WBGene00013038	WBGene00012134
				WBGene00013075	WBGene00012135
				WBGene00013078	WBGene00012138
				WBGene00013086	WBGene00012143
				WBGene00013093	WBGene00012144
				WBGene00013095	WBGene00012152
				WBGene00013096	WBGene00012159
				WBGene00013106	WBGene00012162
				WBGene00013127	WBGene00012168
				WBGene00013128	WBGene00012169
				WBGene00013137	WBGene00012171
				WBGene00013156	WBGene00012172
				WBGene00013160	WBGene00012173
				WBGene00013164	WBGene00012174
				WBGene00013168	WBGene00012177
				WBGene00013177	WBGene00012180
				WBGene00013187	WBGene00012186
				WBGene00013189	WBGene00012191
				WBGene00013193	WBGene00012197
				WBGene00013196	WBGene00012204
				WBGene00013202	WBGene00012207
				WBGene00013208	WBGene00012216
				WBGene00013209	WBGene00012219
				WBGene00013212	WBGene00012223
				WBGene00013214	WBGene00012226
				WBGene00013216	WBGene00012249
				WBGene00013219	WBGene00012250
				WBGene00013223	WBGene00012257
				WBGene00013224	WBGene00012261
				WBGene00013225	WBGene00012273
				WBGene00013230	WBGene00012278
				WBGene00013231	WBGene00012279
				WBGene00013232	WBGene00012282
				WBGene00013233	WBGene00012291
				WBGene00013234	WBGene00012293
				WBGene00013235	WBGene00012294
[truncated: 2,372 more rows]
