# Supplementary figures and images for: The TRIM-NHL protein NHL-2 is a co-factor in the nuclear and somatic RNAi pathways in C. elegans
Source: eLife journal article supplement (doi:10.7554/elife.35478), 2018-12-21

**A**

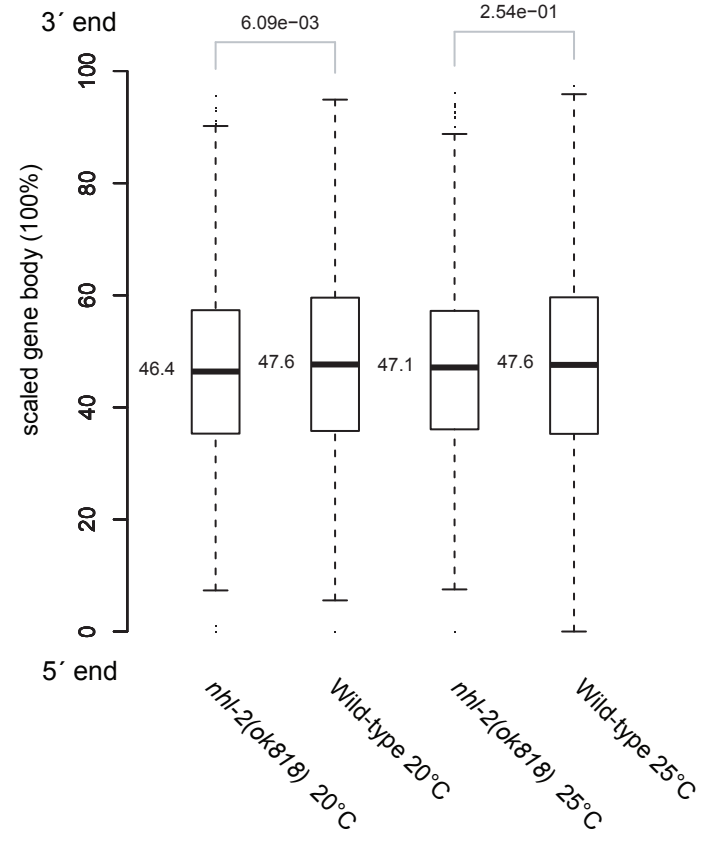

**B**

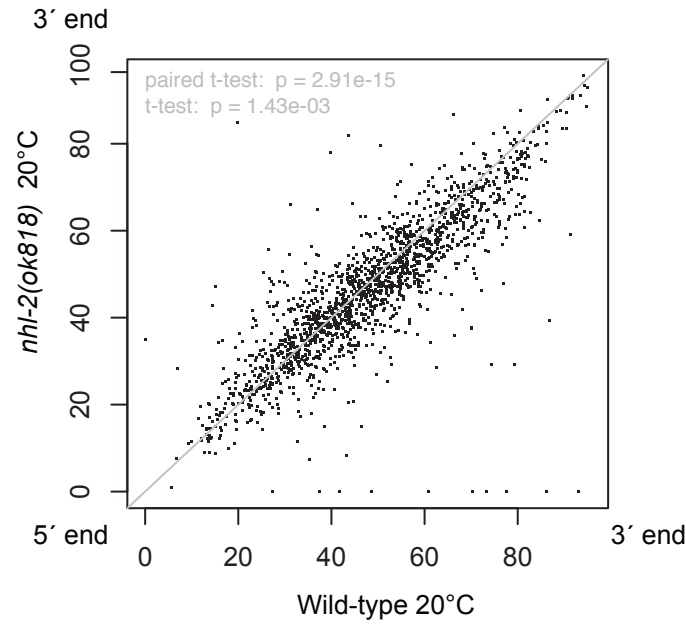

**C**

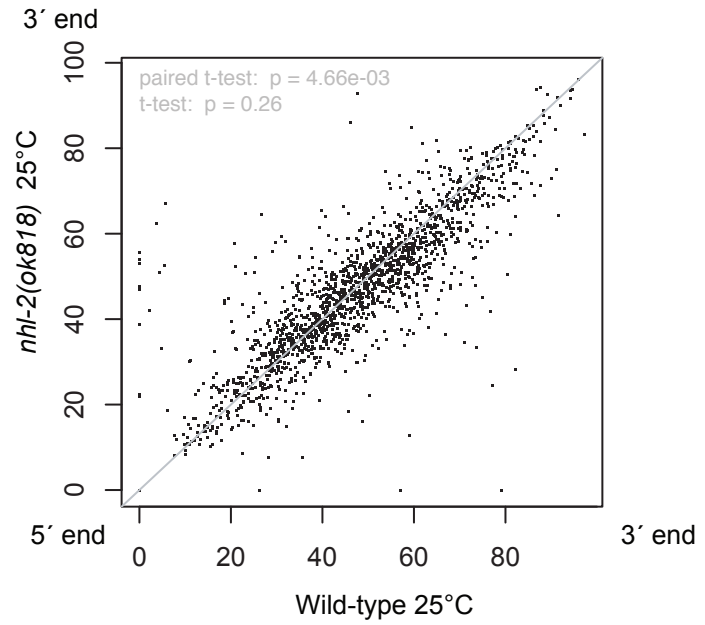

Supplement: supp [file elife-35478-supp-v1.zip]

Davis et al Figure 5 Supplemental Fig. 1

**A**

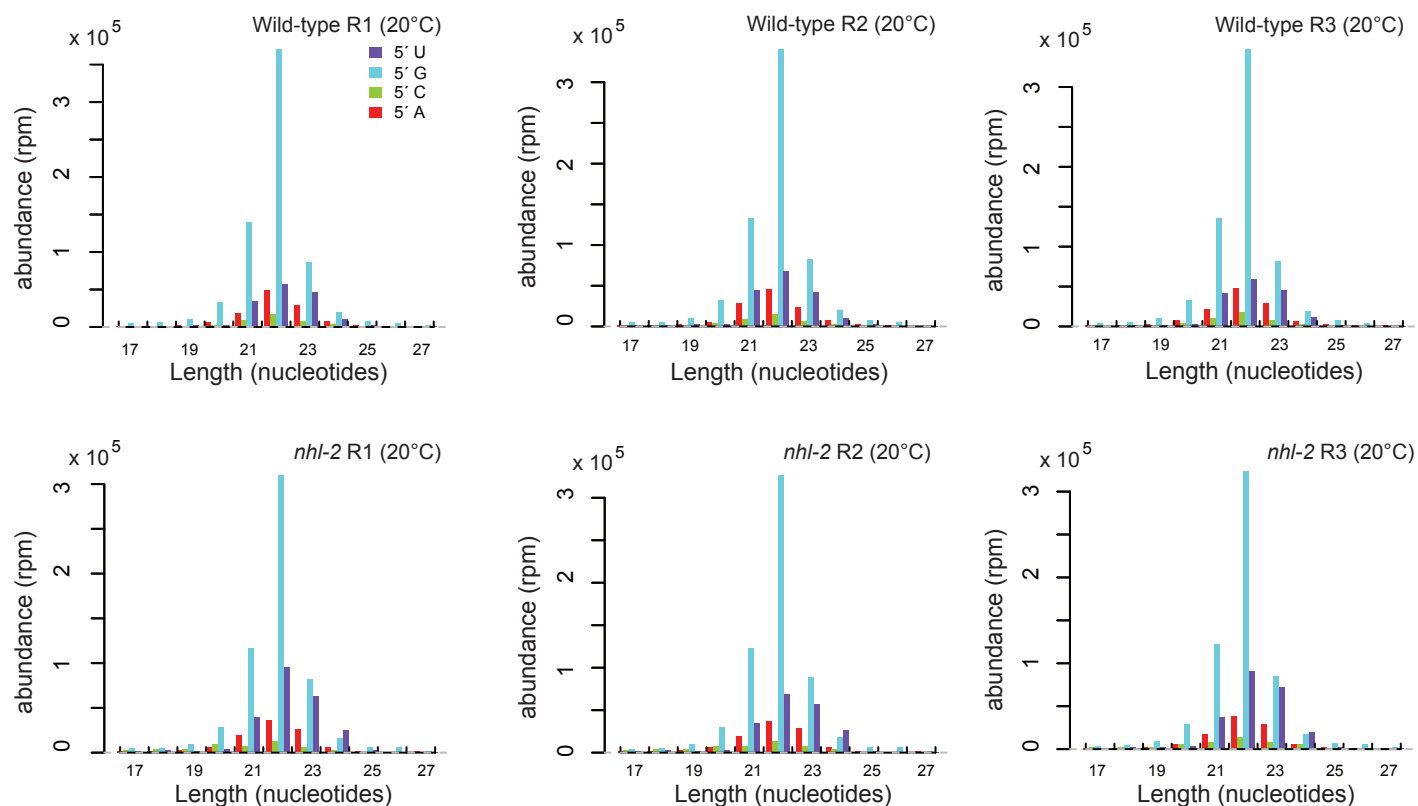

**B**

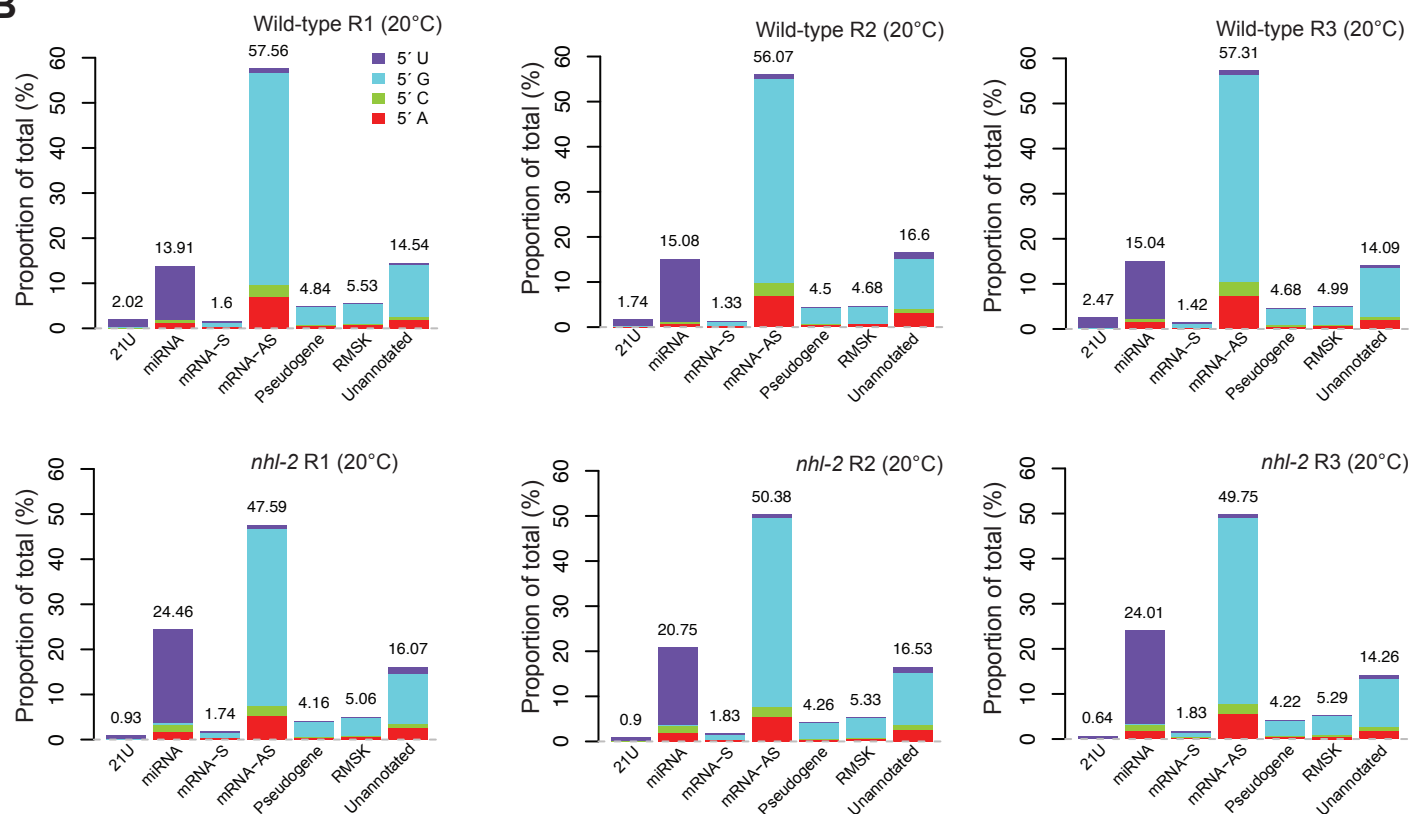

Supplement: supp [file elife-35478-supp-v1.zip]

**A**

**20°C**

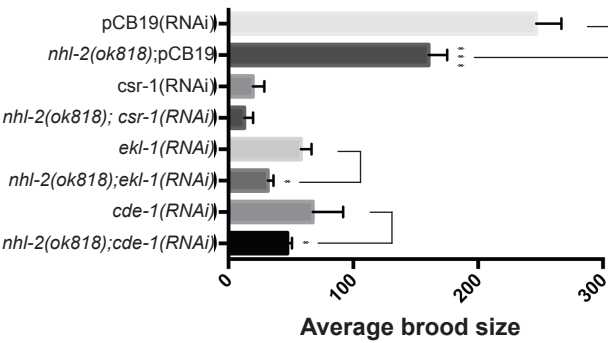

**B**

**25°C**

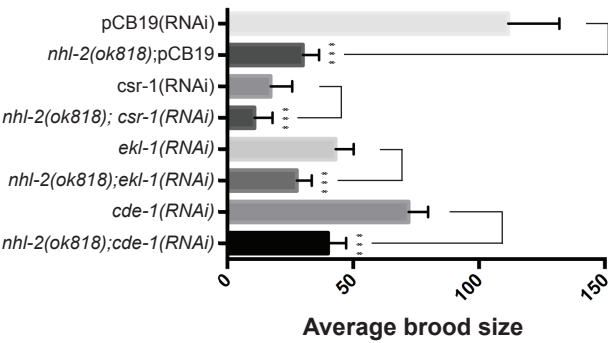

**C**

**20°C**

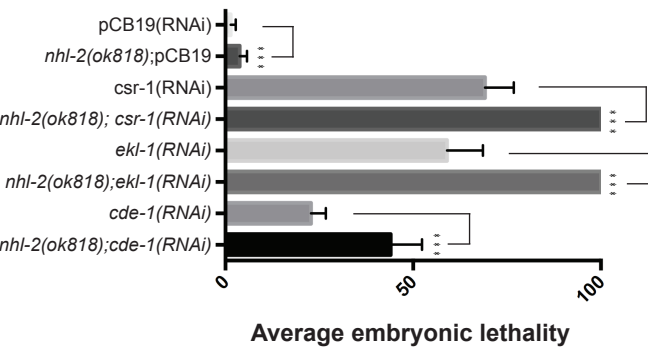

**D**

**25°C**

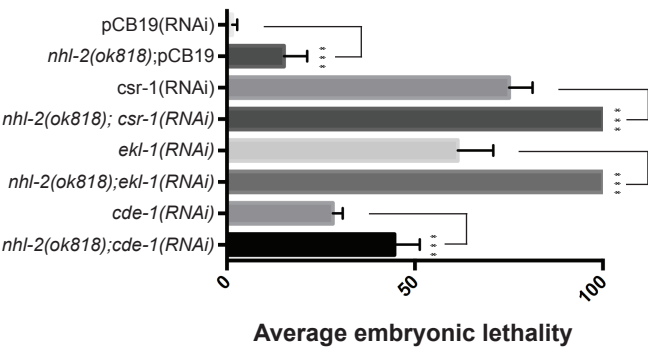

Supplement: supp [file elife-35478-supp-v1.zip]

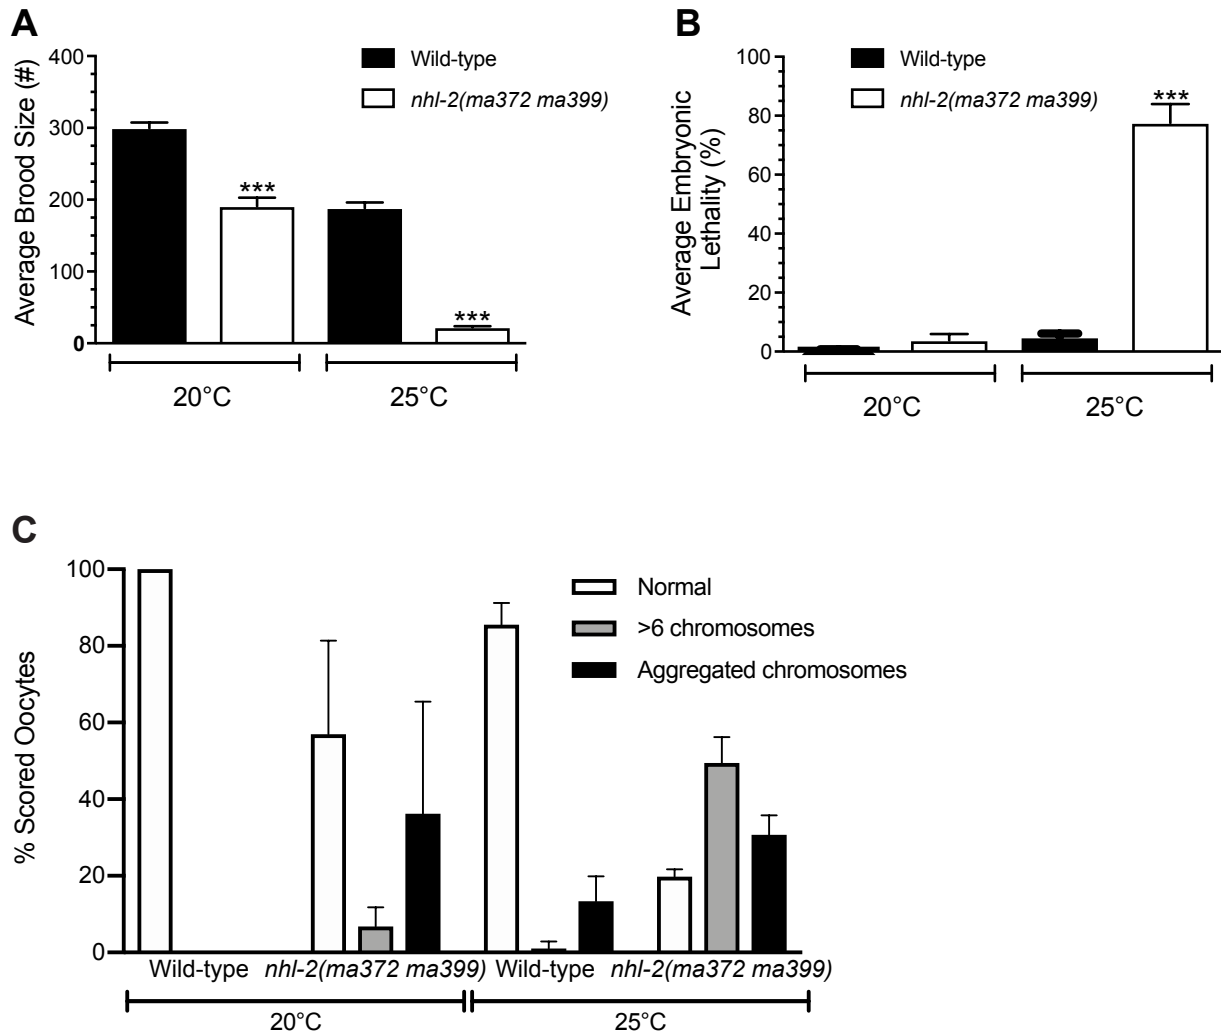

Supplement: supp [file elife-35478-supp-v1.zip]

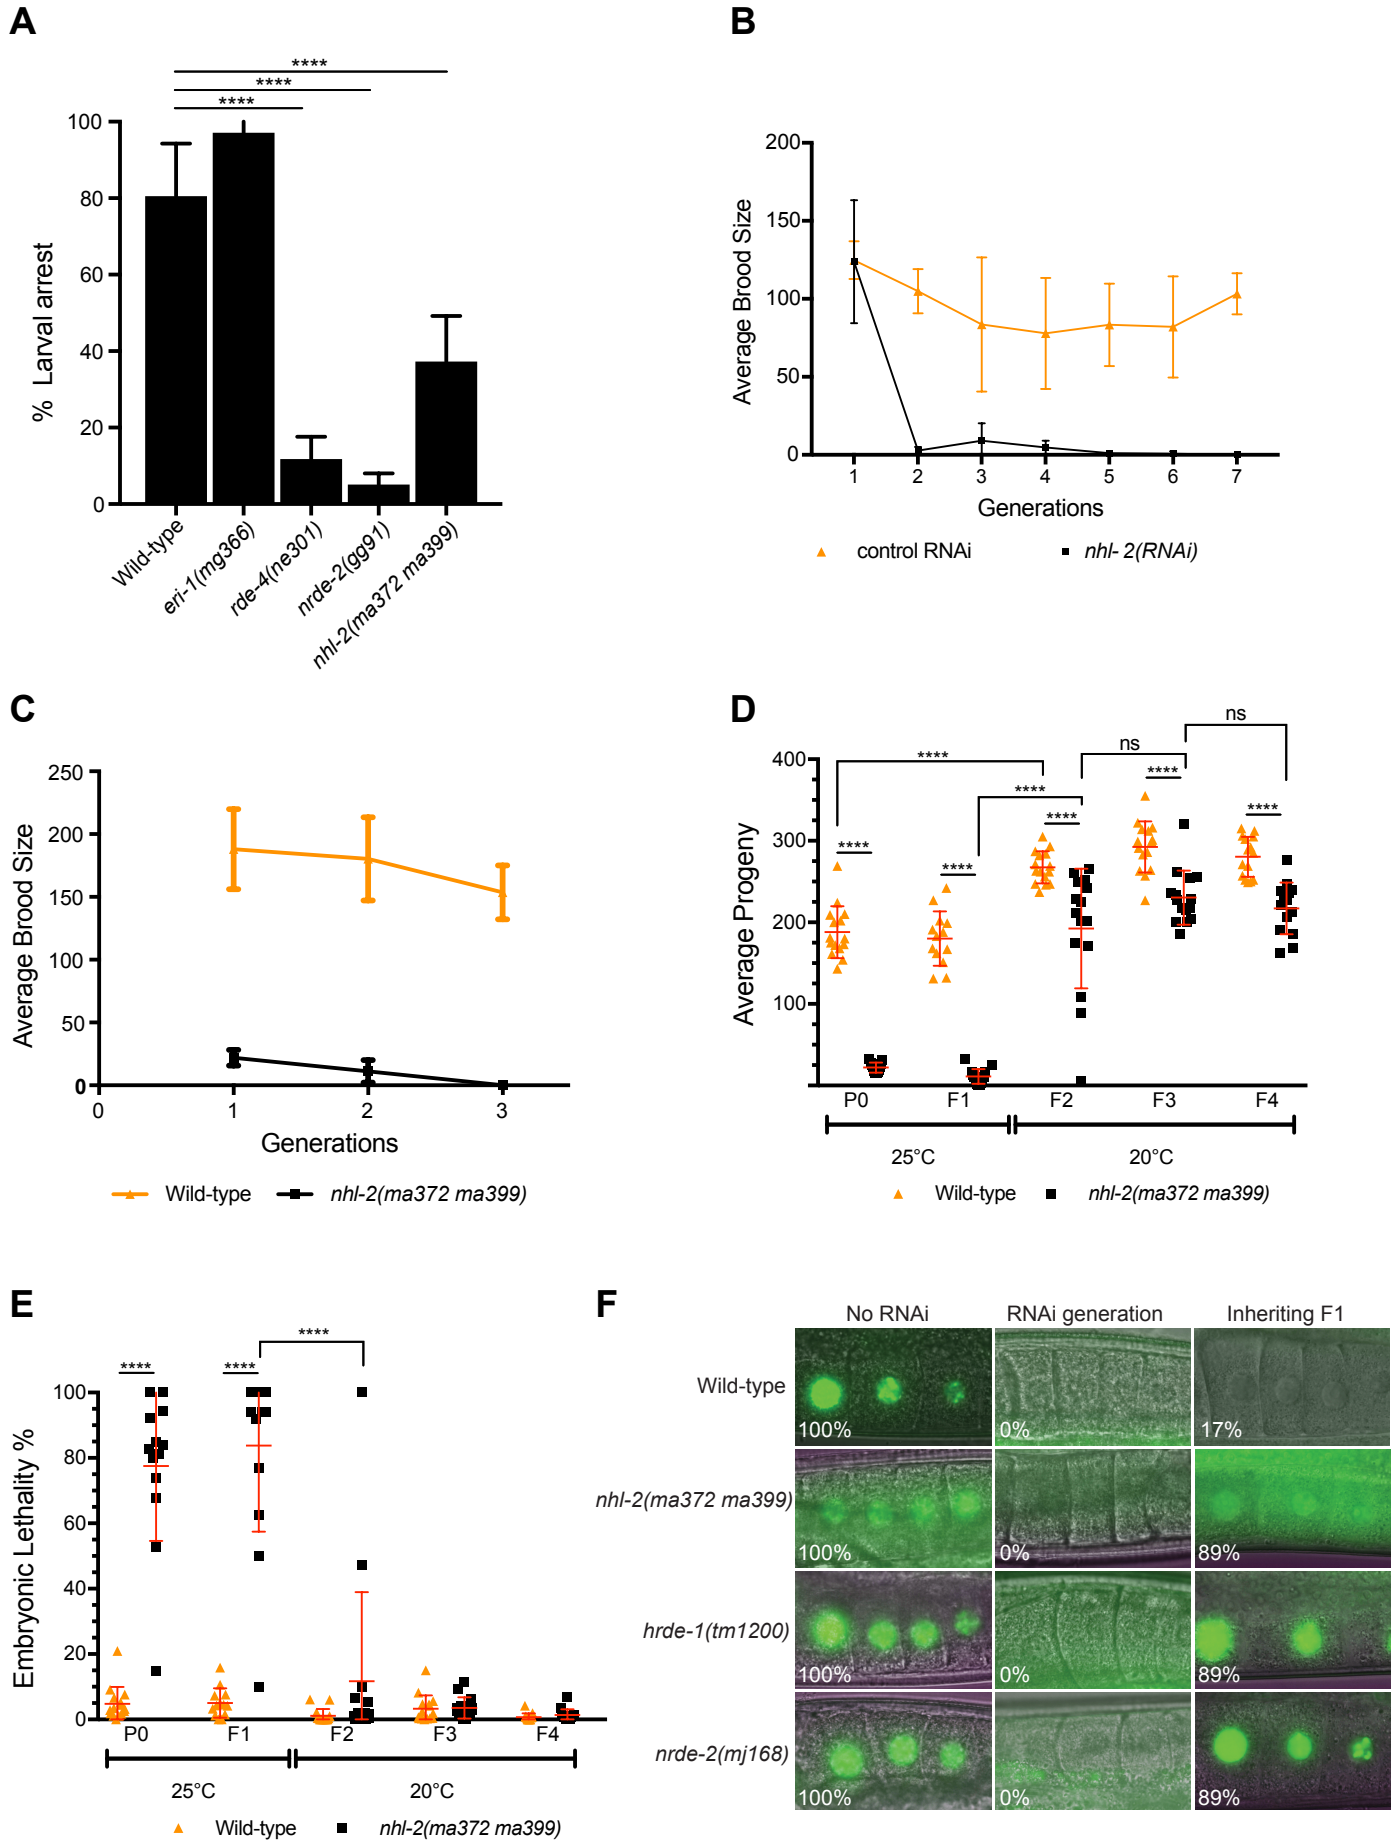

Supplement: supp [file elife-35478-supp-v1.zip]

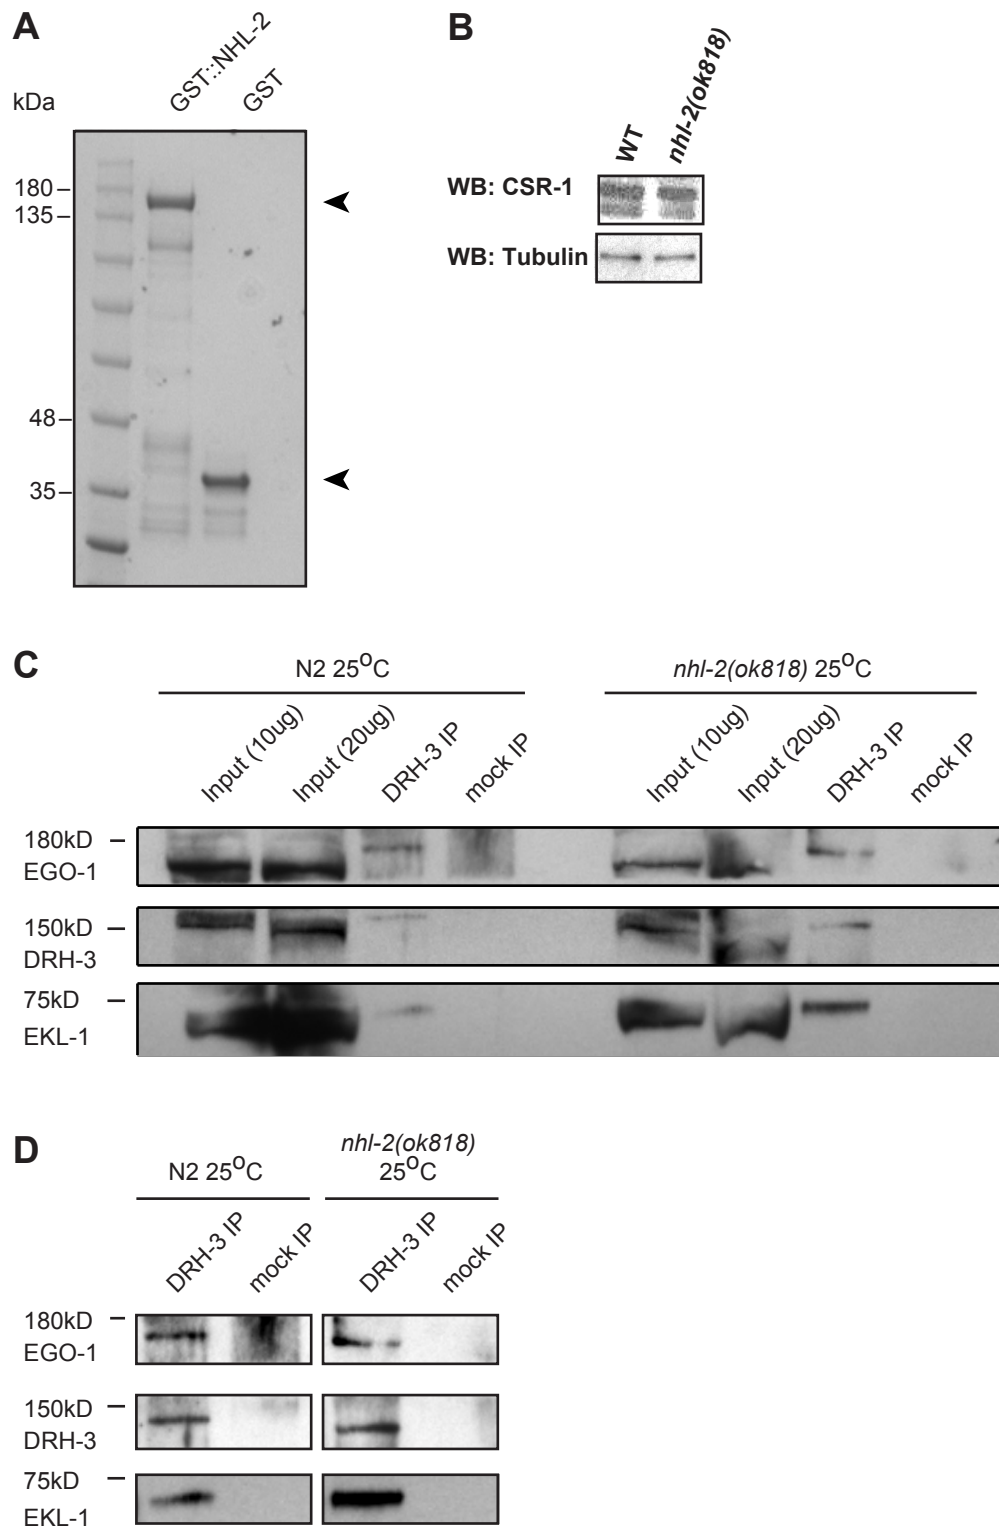

Supplement: supp [file elife-35478-supp-v1.zip]

**A**

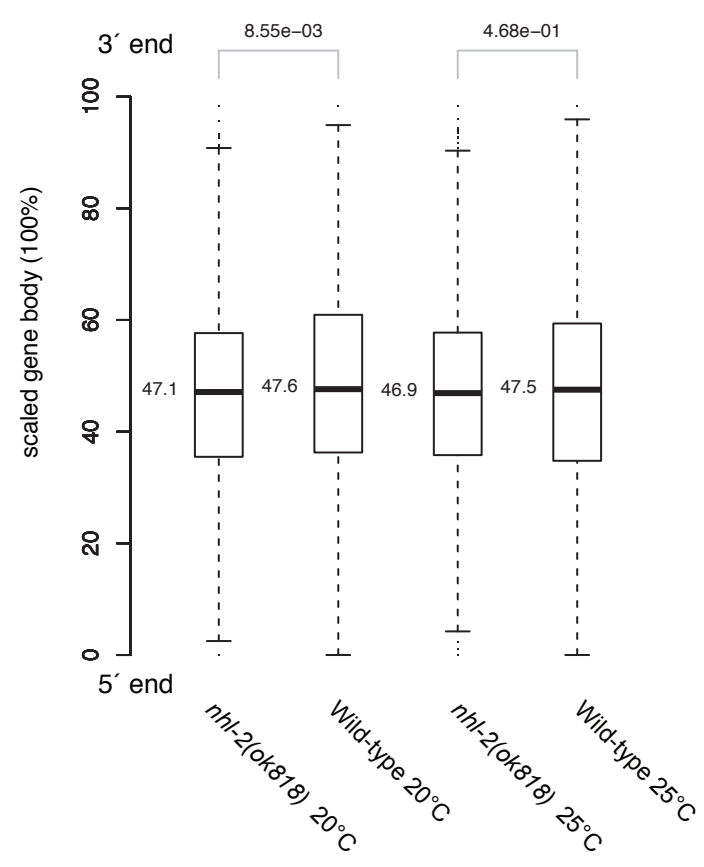

**B**

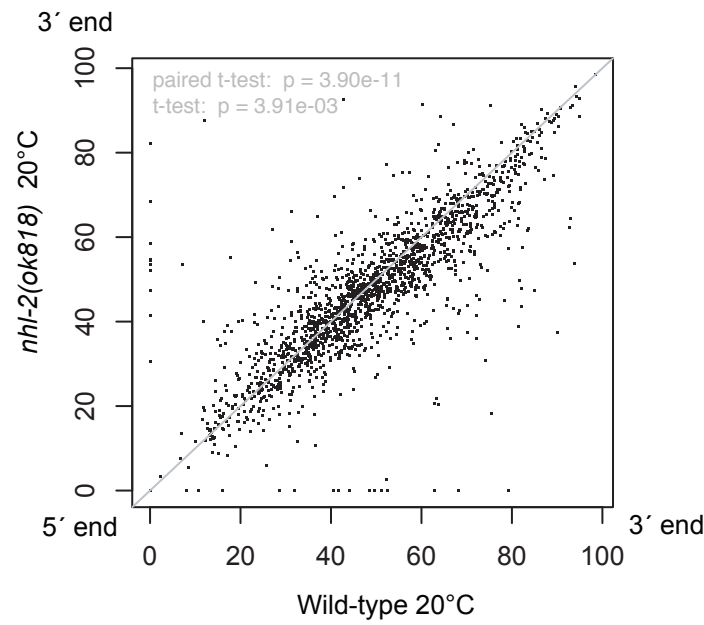

**C**

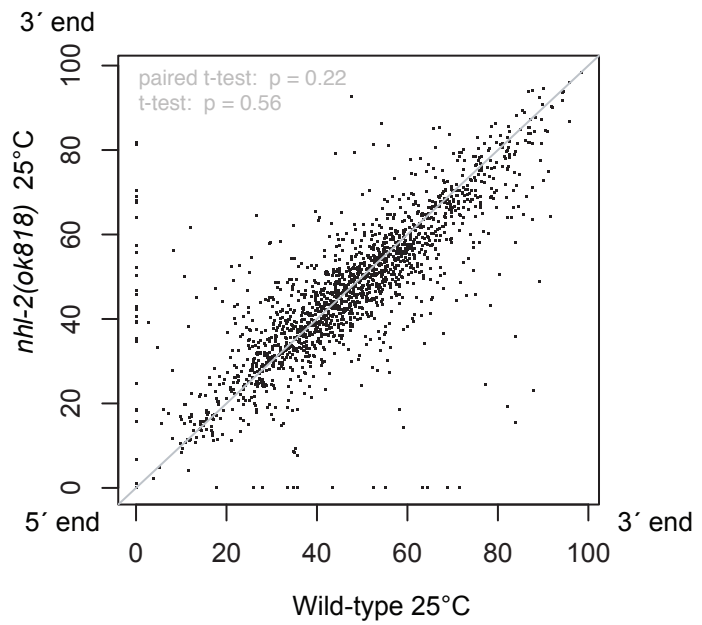

Supplement: supp [file elife-35478-supp-v1.zip]

**A**

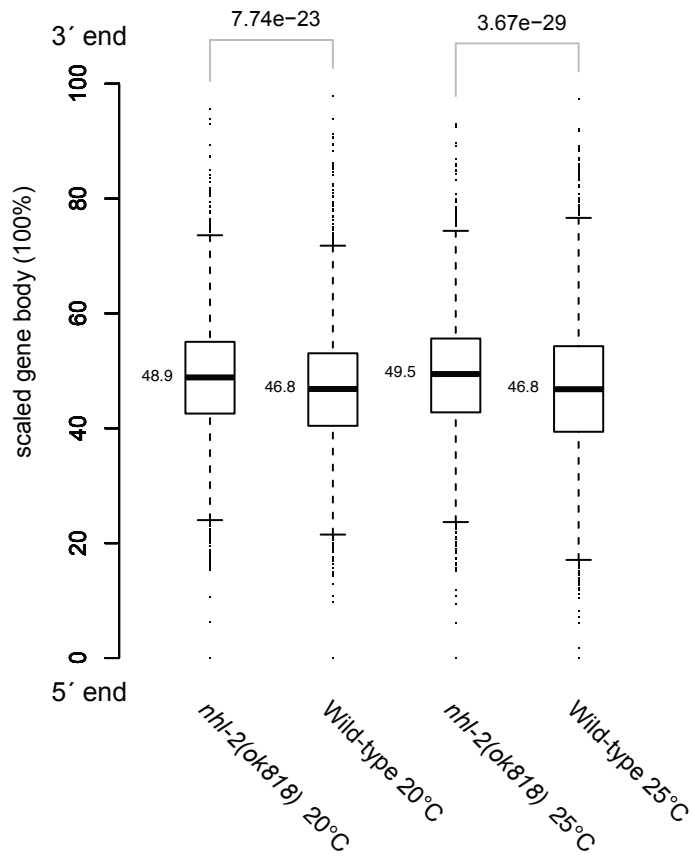

**B**

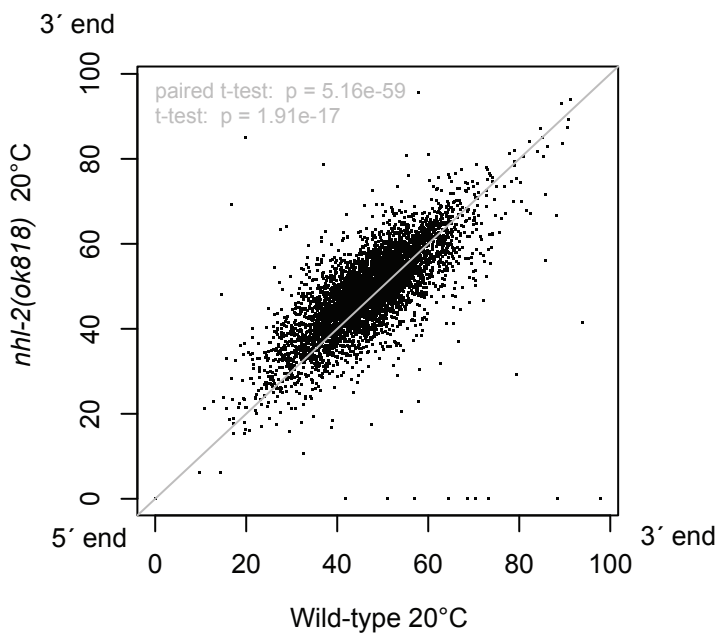

**C**

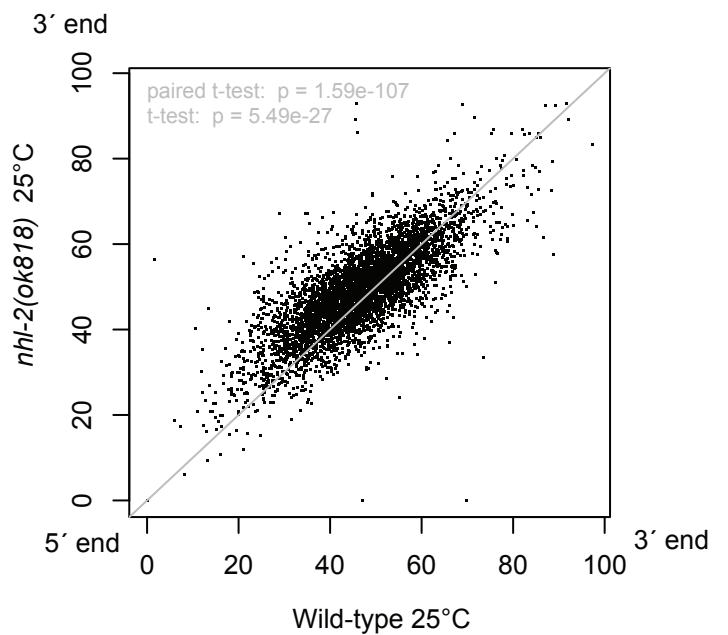

Supplement: supp [file elife-35478-supp-v1.zip]

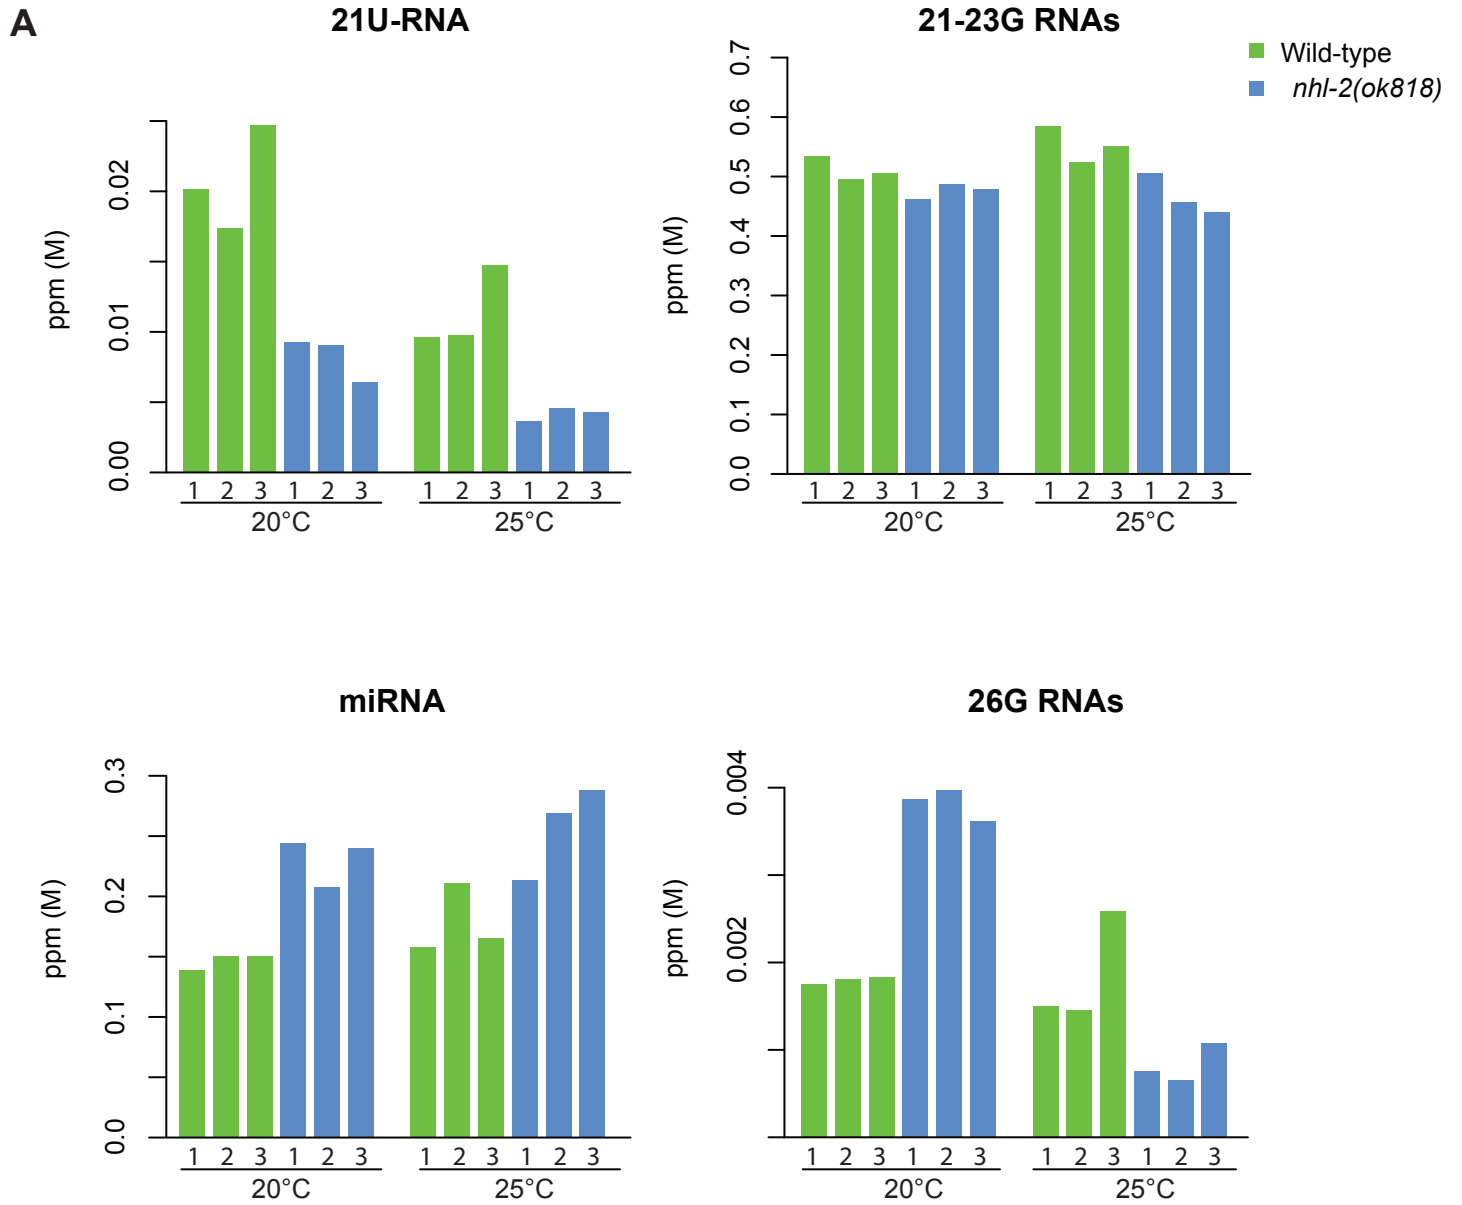

Supplement: supp [file elife-35478-supp-v1.zip]

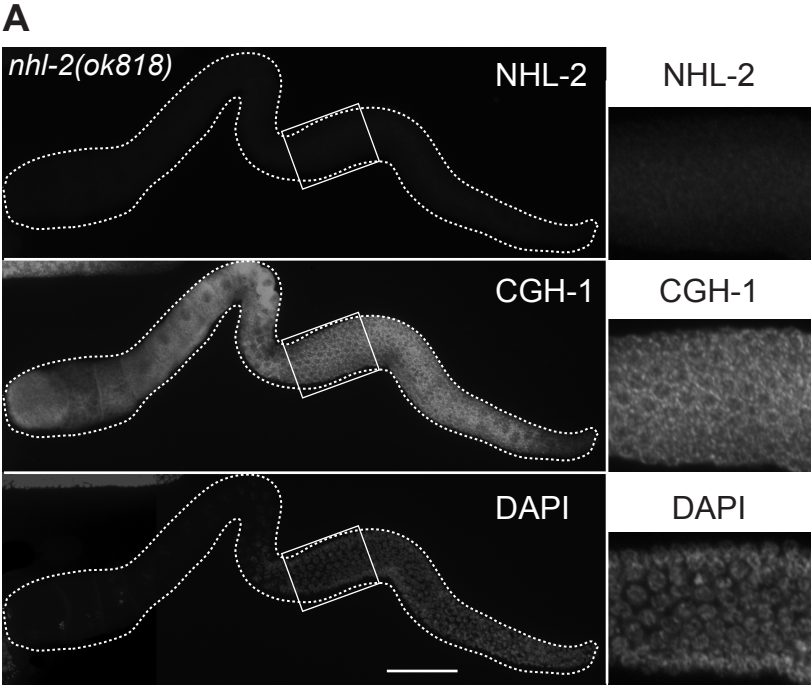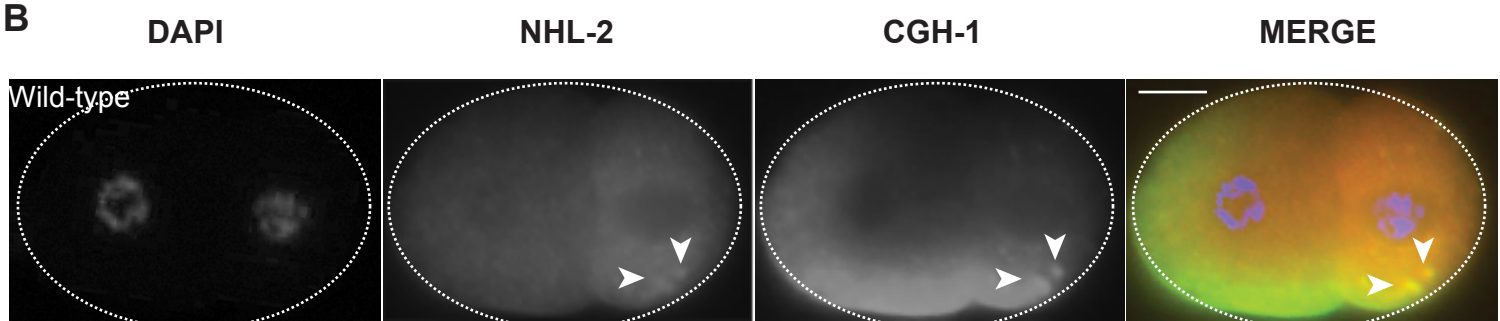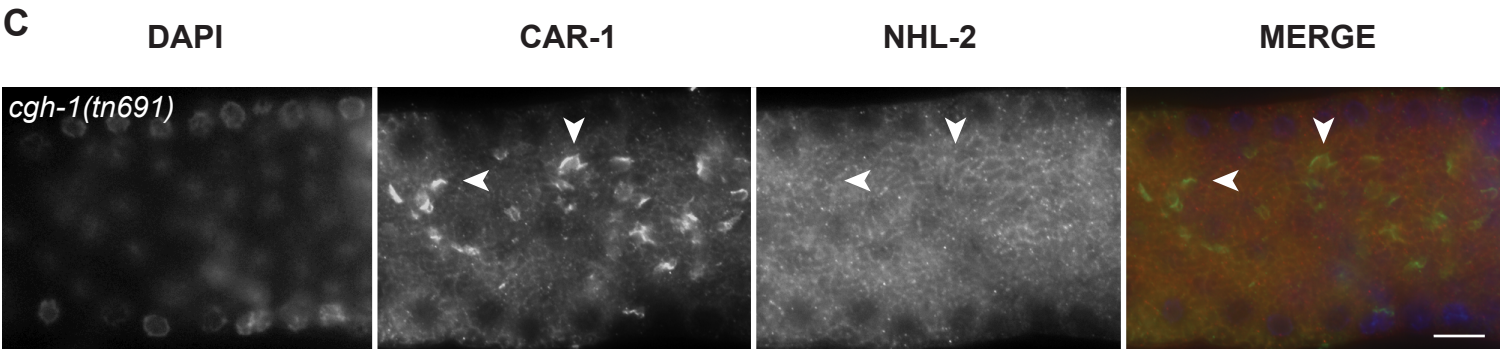

Supplement: supp [file elife-35478-supp-v1.zip]

Davis et al Figure 5 Supplementary Figure 2

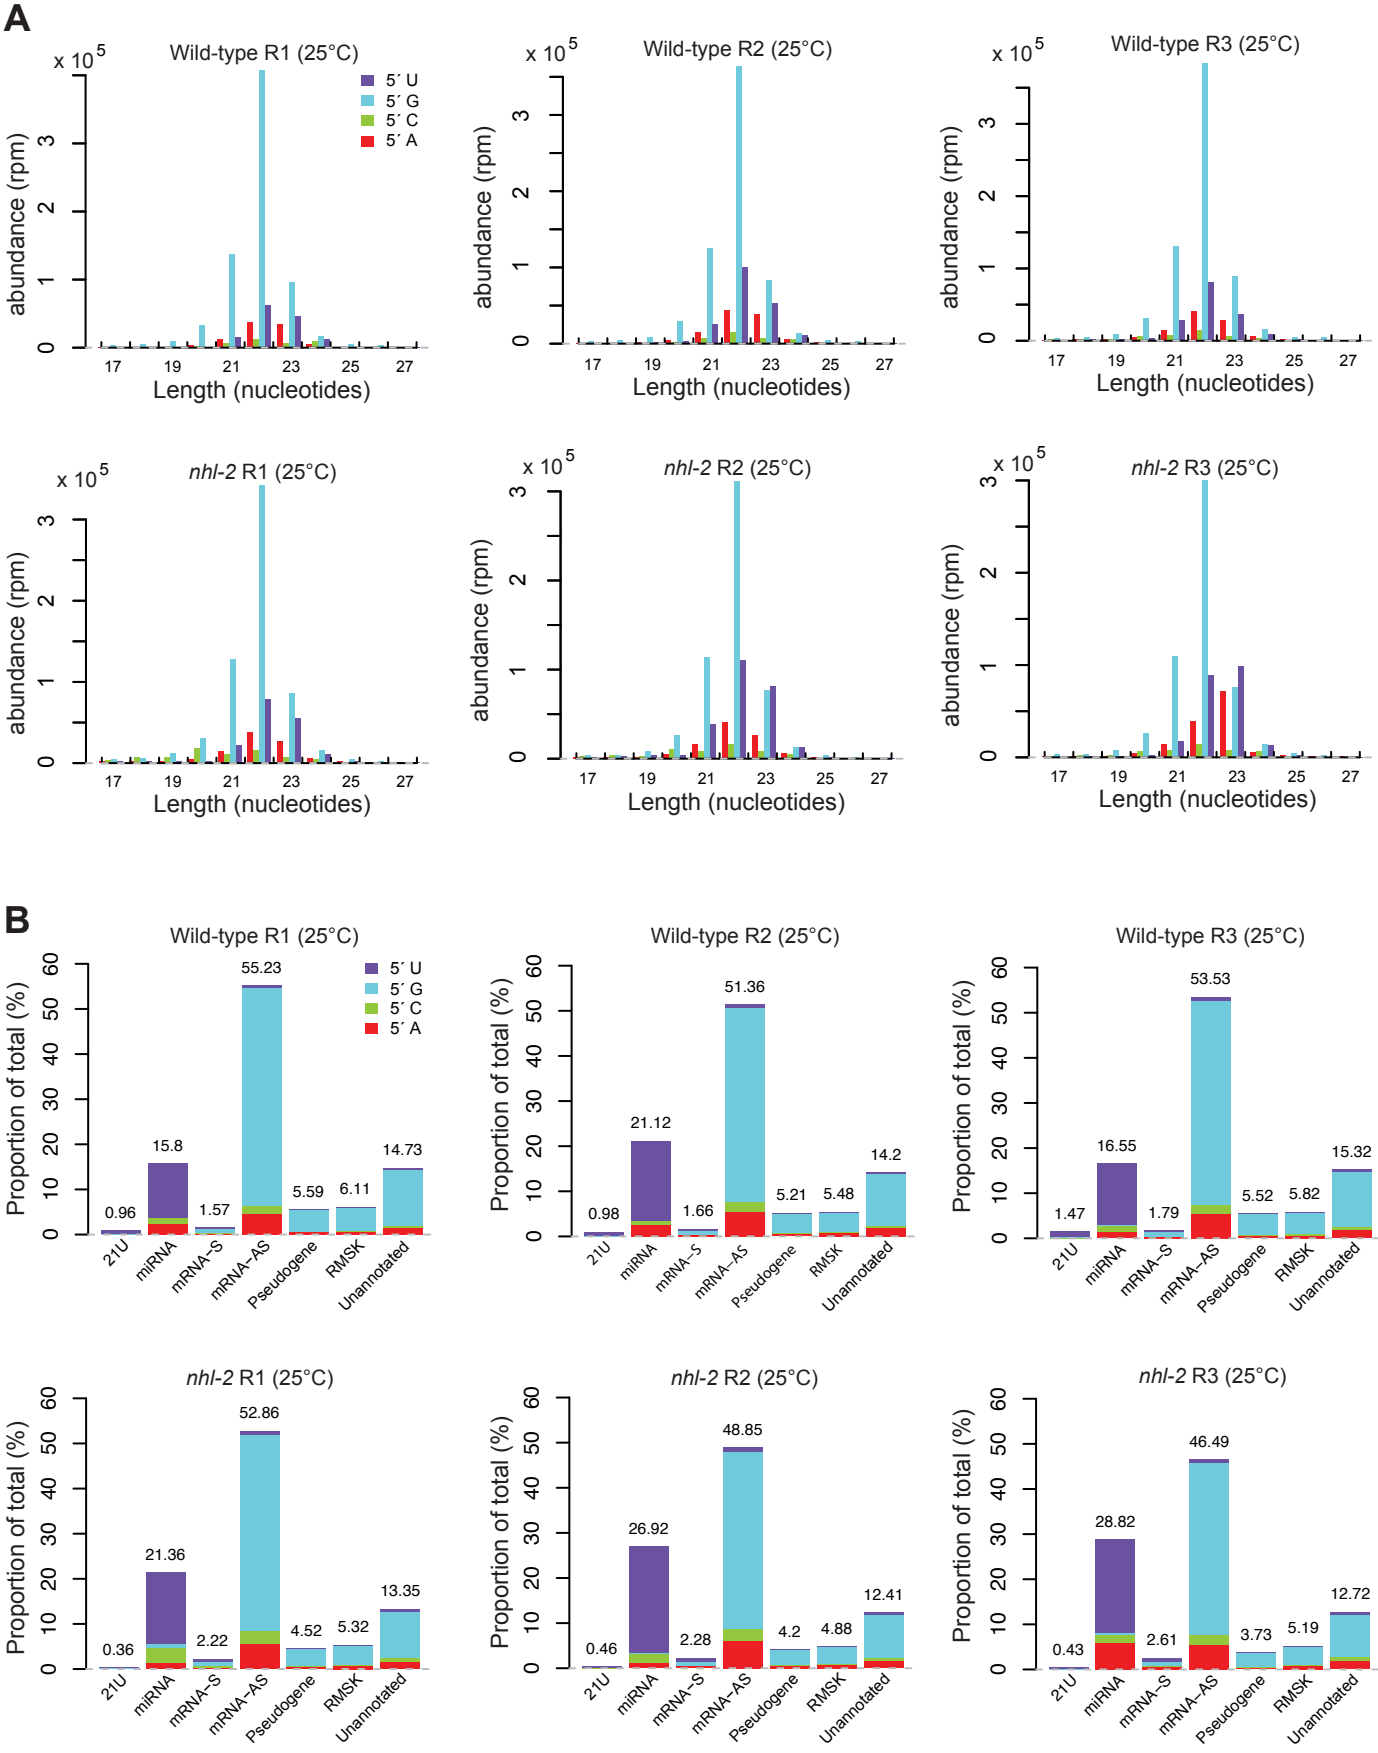

Supplement: supp [file elife-35478-supp-v1.zip]

**A**

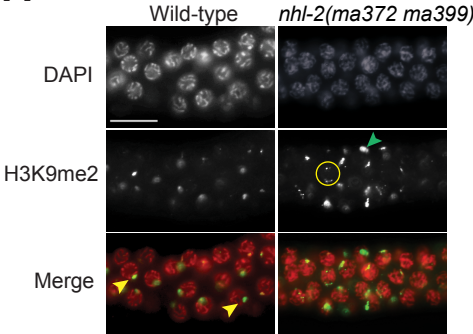

**B**

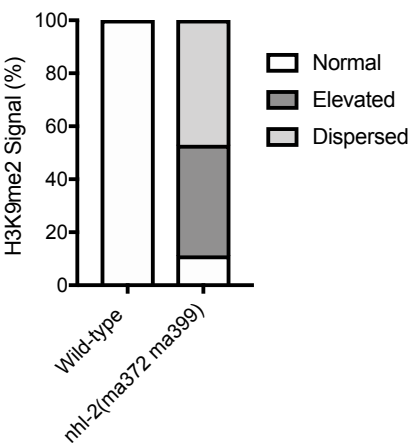

Supplement: supp [file elife-35478-supp-v1.zip]
